# Supplementary material for: Selective conformational control by excitation of NH imino vibrational antennas
Source: Royal Society of Chemistry journal article supplement (doi:10.1039/c9cp05370k), 2019-01-01
Supplement: c9cp05370k1.pdf [file c9cp05370k1.pdf]

Electronic Supplementary Information for

**Selective conformational control by excitation of NH imino vibrational  
antennas**

Sándor Góbi,<sup>a,\*</sup> Igor Reva,<sup>a</sup> István Pál Csonka,<sup>b</sup> Cláudio M. Nunes,<sup>a</sup>

György Tarczay<sup>b,c</sup> and Rui Fausto<sup>a,d</sup>

<sup>a</sup> *CQC, Department of Chemistry, University of Coimbra, Rua Larga, 3004–535, Coimbra, Portugal*

<sup>b</sup> *MTA-ELTE Lendület Laboratory Astrochemistry Research Group, Institute of Chemistry, ELTE Eötvös Loránd University, P.O. Box 32, H–1518 Budapest, Hungary*

<sup>c</sup> *Laboratory of Molecular Spectroscopy, Institute of Chemistry, ELTE Eötvös Loránd University, P.O. Box 32, H–1518 Budapest, Hungary*

<sup>d</sup> *Chemistry Department, King Fahd University of Petroleum and Minerals, Dhahran, KSA–31261, Saudi Arabia*

\*Corresponding author: [sgobi@qui.uc.pt](mailto:sgobi@qui.uc.pt)

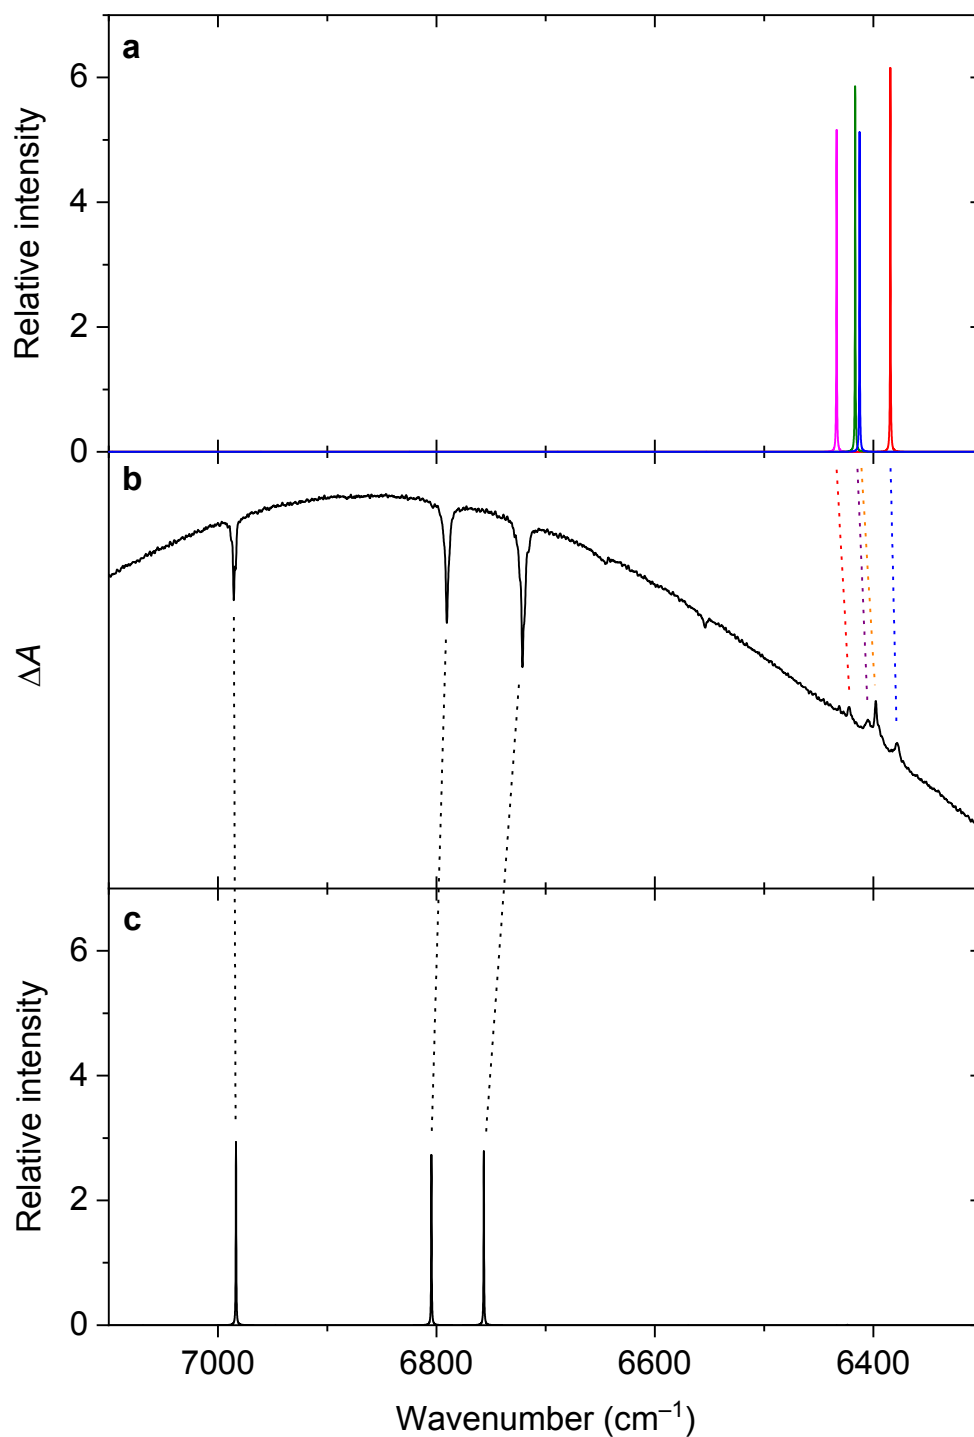

**Figure S1.** (a) Simulated spectra of the **aC** (red), **aT** (green), **sC** (pink), and **sT** (blue) imino-thiol isomers of thioacetamide. (b) Experimental near-IR spectrum showing changes induced by UV irradiation of thioacetamide monomers isolated in an argon matrix at 11 K ( $\lambda = 265$  nm). Growing bands show upwards. (c) Simulated spectrum of the **Tn** tautomer. The simulated spectra are based on the unscaled anharmonic vibrational frequencies and anharmonic IR intensities computed at the B3LYP/6-311++G(3df,3pd) level of theory.

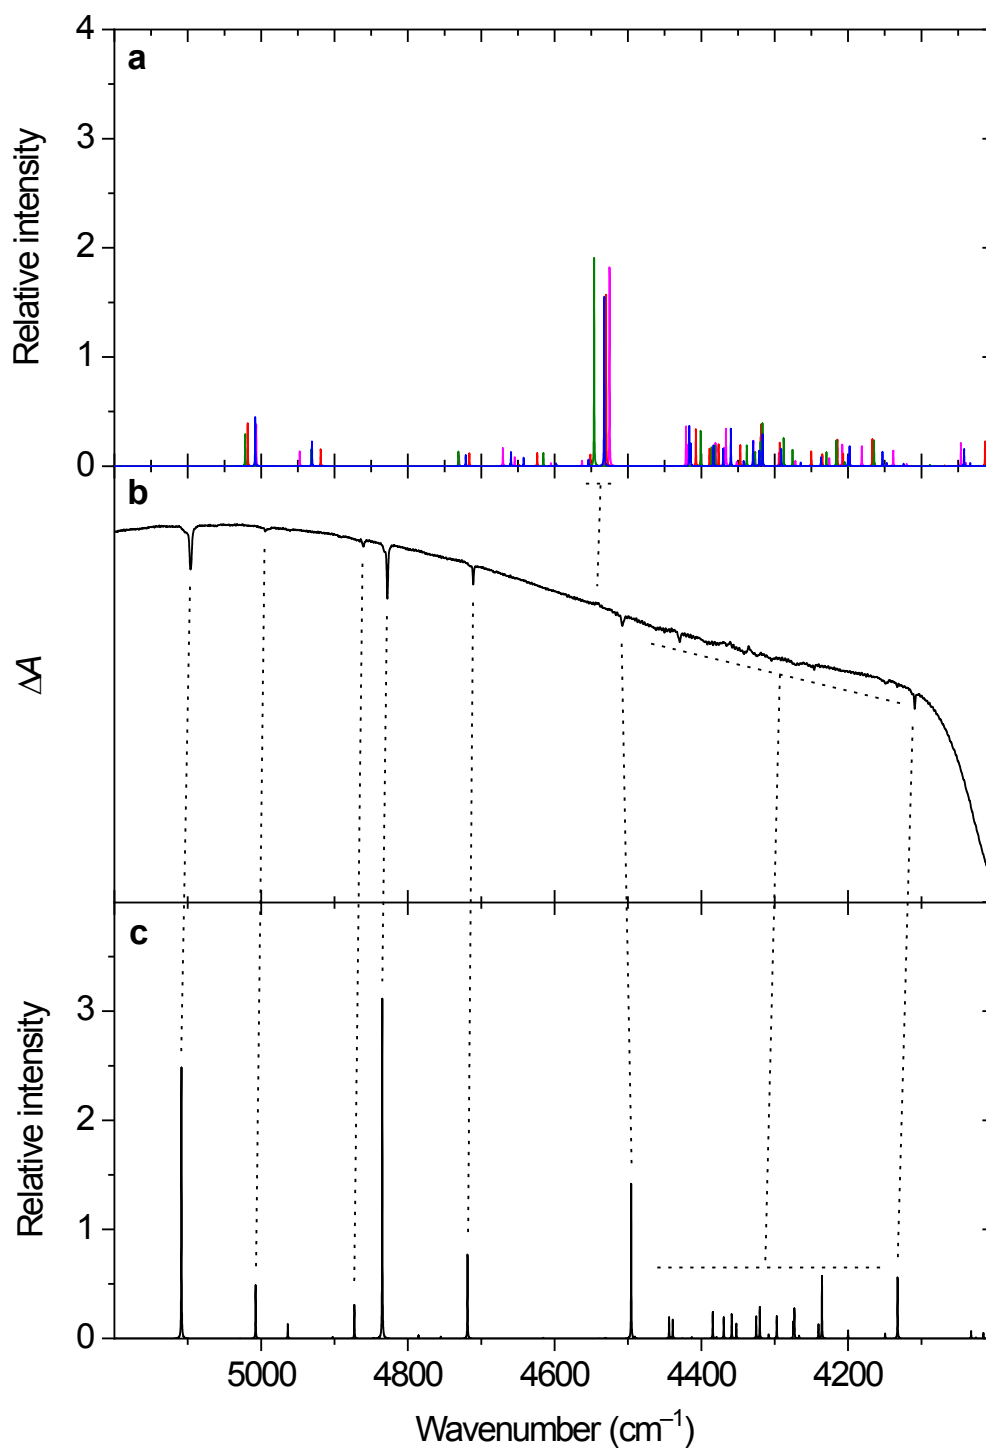

**Figure S2.** (a) Simulated spectra of the **aC** (red), **aT** (green), **sC** (pink), and **sT** (blue) imino-thiol isomers of thioacetamide. (b) Experimental near-IR spectrum showing changes induced by UV irradiation of thioacetamide monomers isolated in an argon matrix at 11 K ( $\lambda = 265$  nm). Growing bands show upwards. (c) Simulated spectrum of the **T<sub>n</sub>** conformer. The simulated spectra are based on the unscaled anharmonic vibrational frequencies and anharmonic IR intensities computed at the B3LYP/6-311++G(3df,3pd) level of theory.

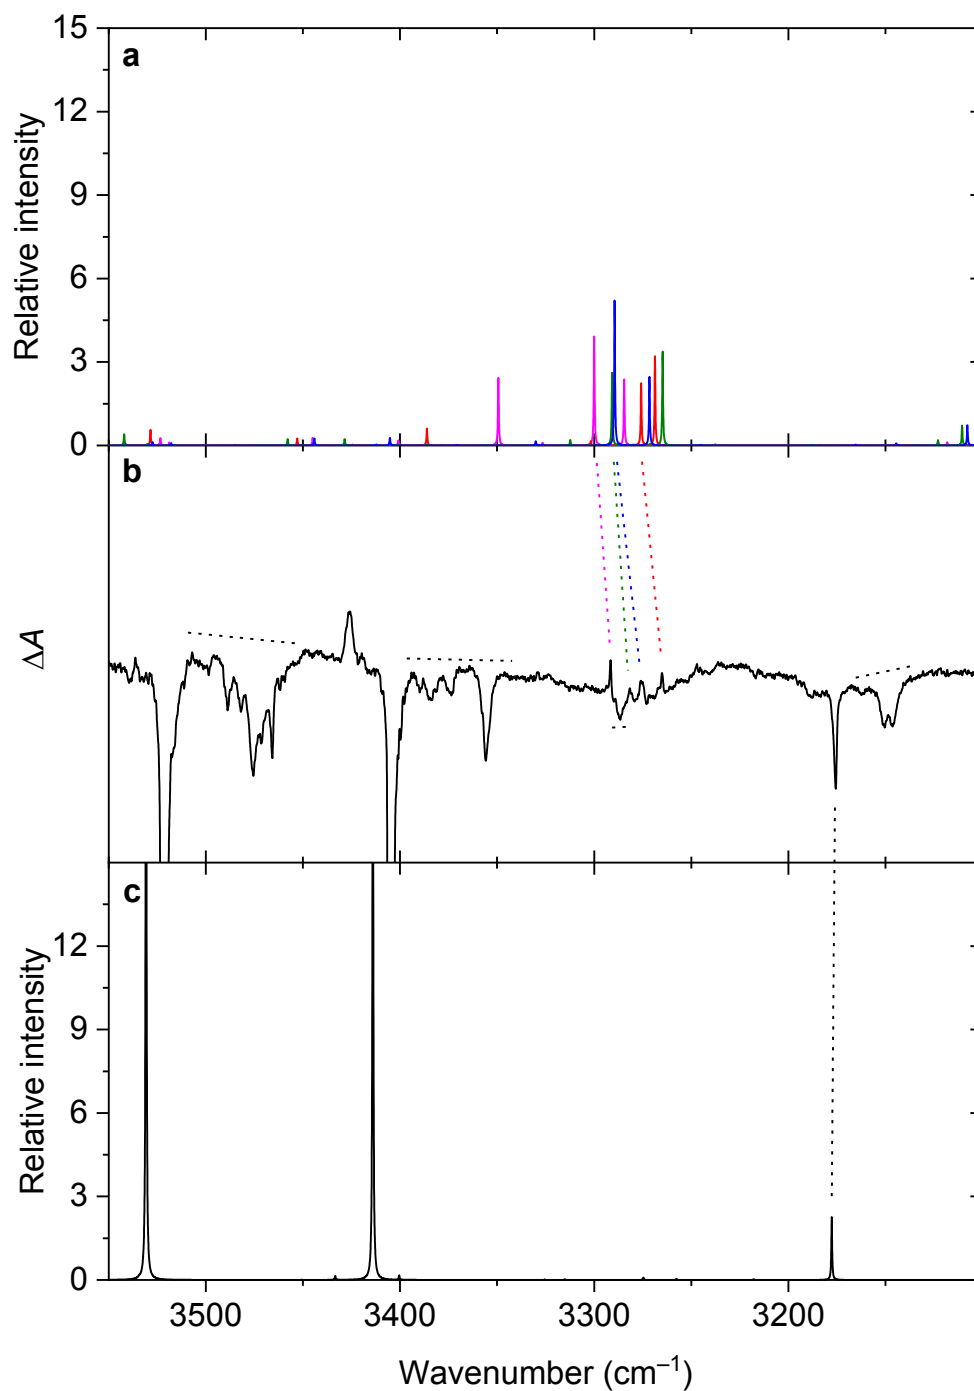

**Figure S3.** (a) Simulated spectra of the **aC** (red), **aT** (green), **sC** (pink), and **sT** (blue) imino-thiol isomers of thioacetamide. (b) Experimental mid-IR spectrum showing changes induced by UV irradiation of thioacetamide monomers isolated in an argon matrix at 11 K ( $\lambda = 265$  nm). Growing bands show upwards. (c) Simulated spectrum of the **Tn** conformer. The simulated spectra are based on the unscaled anharmonic vibrational frequencies and anharmonic IR intensities computed at the B3LYP/6-311++G(3df,3pd) level of theory.

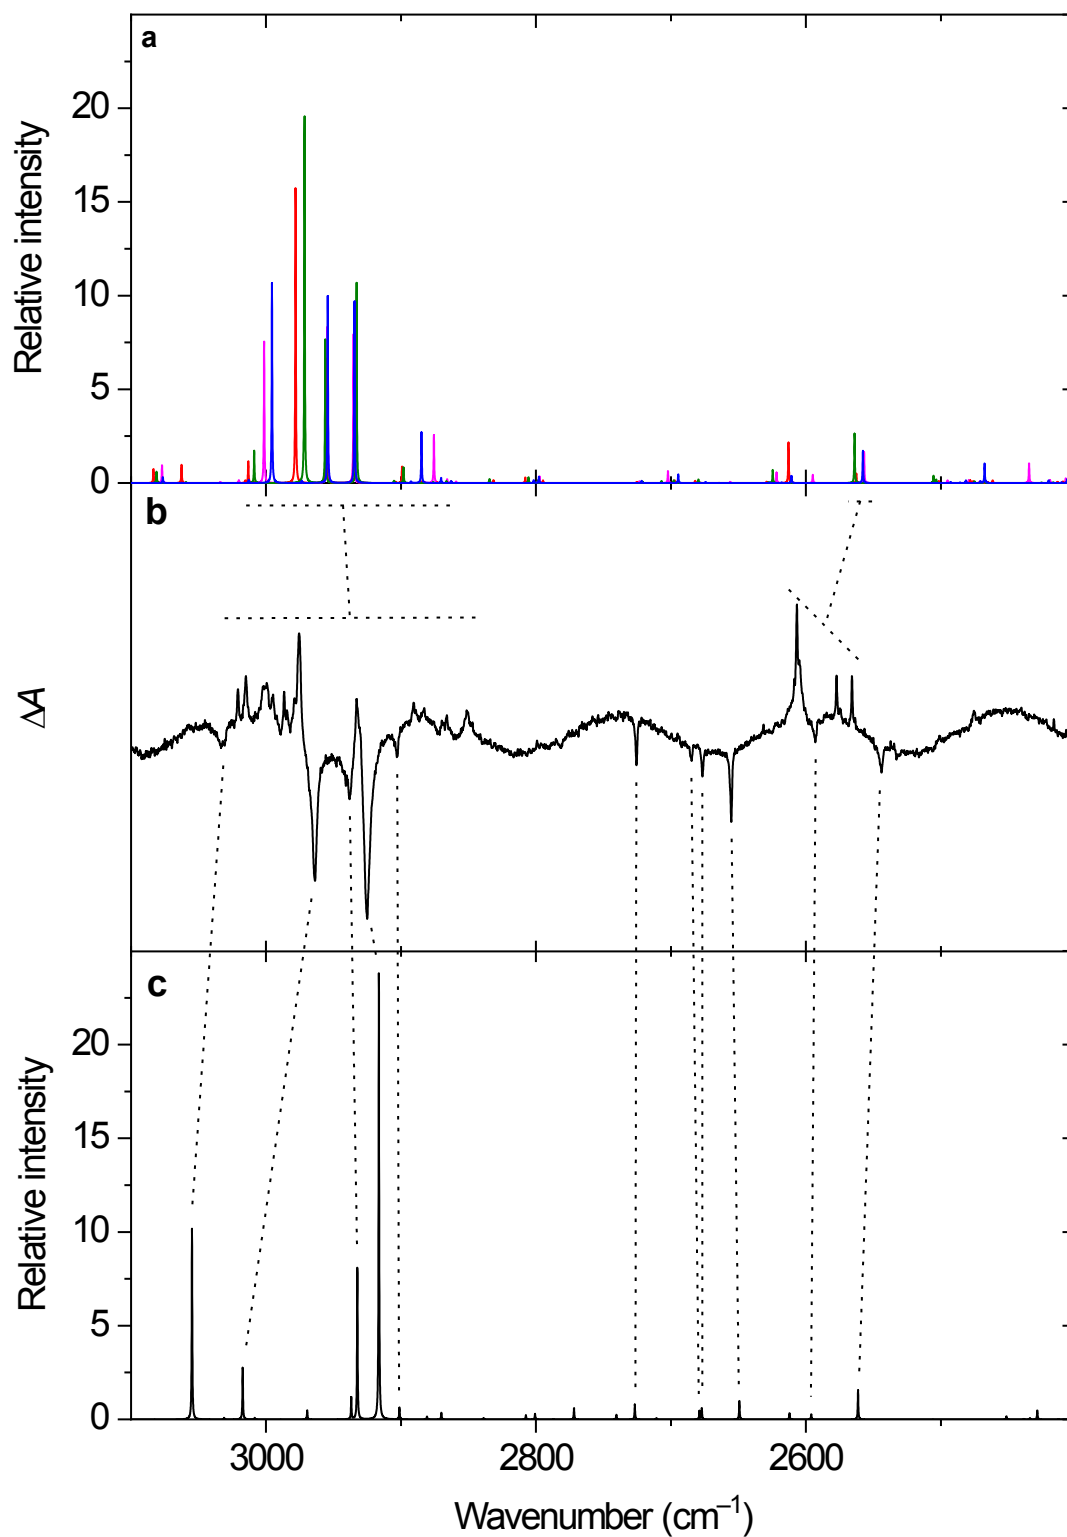

**Figure S4.** (a) Simulated spectra of the **aC** (red), **aT** (green), **sC** (pink), and **sT** (blue) imino-thiol isomers of thioacetamide. (b) Experimental mid-IR spectrum showing changes induced by UV irradiation of thioacetamide monomers isolated in an argon matrix at 11 K ( $\lambda = 265$  nm). Growing bands show upwards. (c) Simulated spectrum of the **T<sub>n</sub>** conformer. The simulated spectra are based on the unscaled anharmonic vibrational frequencies and anharmonic IR intensities computed at the B3LYP/6-311++G(3df,3pd) level of theory.

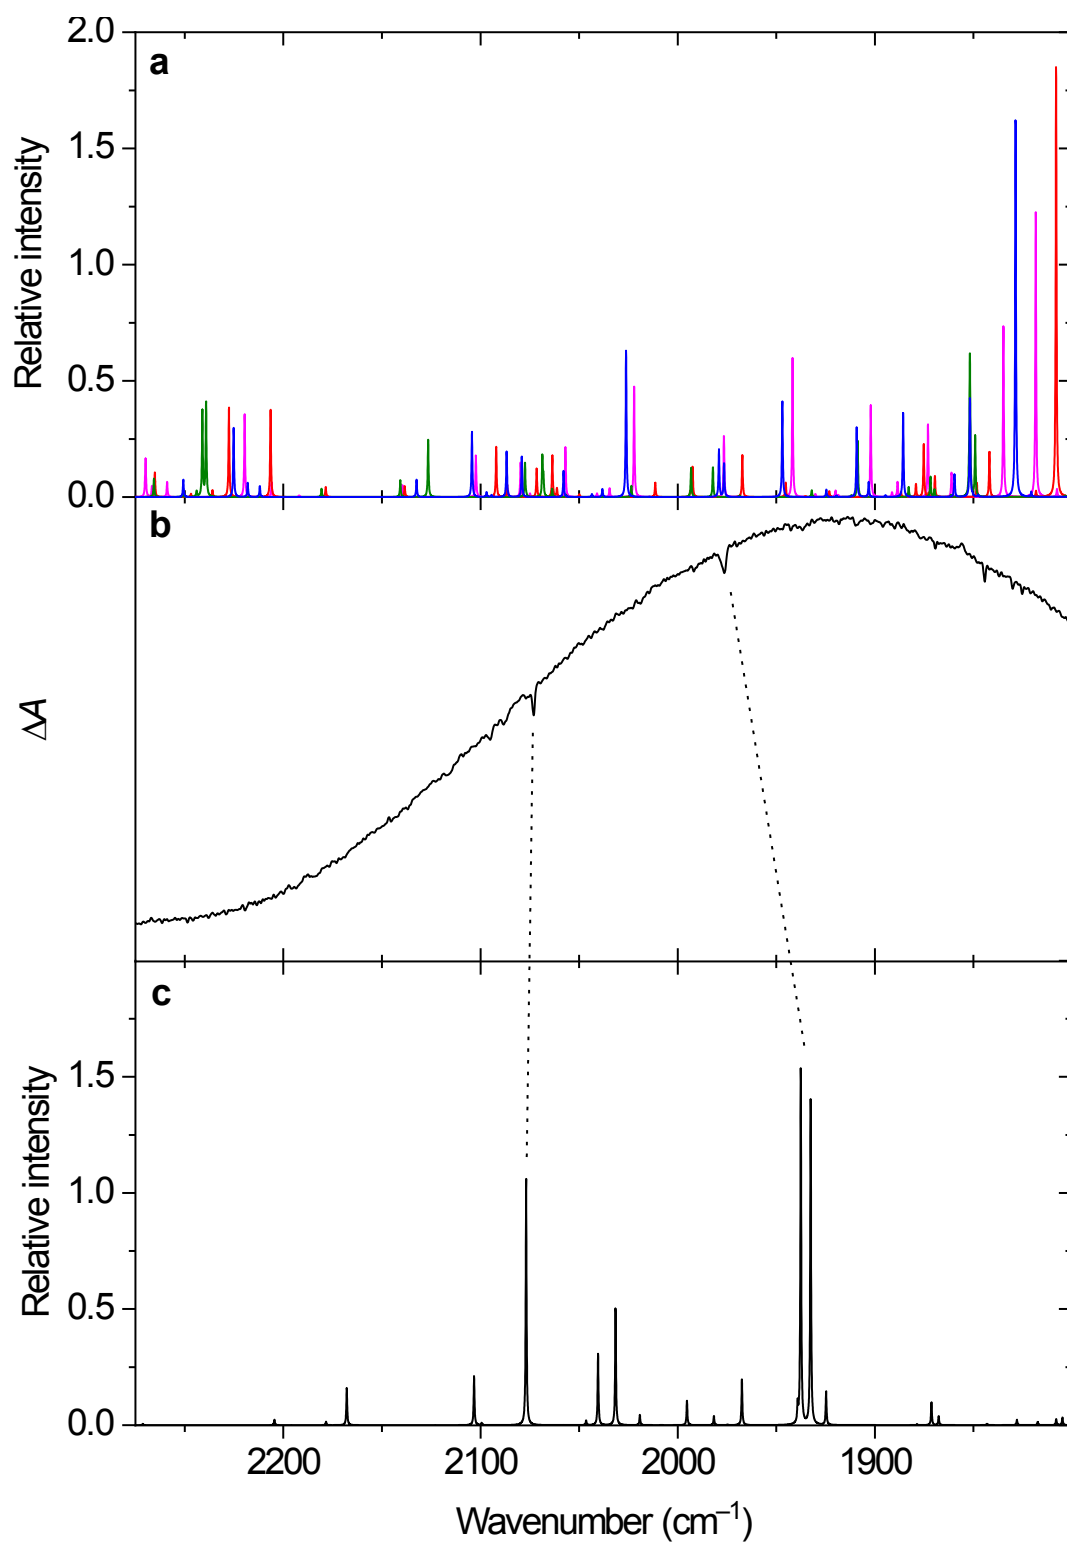

**Figure S5.** (a) Simulated spectra of the **aC** (red), **aT** (green), **sC** (pink), and **sT** (blue) imino-thiol isomers of thioacetamide. (b) Experimental mid-IR spectrum showing changes induced by UV irradiation of thioacetamide monomers isolated in an argon matrix at 11 K ( $\lambda = 265$  nm). Growing bands show upwards. (c) Simulated spectrum of the **T<sub>n</sub>** conformer. The simulated spectra are based on the unscaled anharmonic vibrational frequencies and anharmonic IR intensities computed at the B3LYP/6-311++G(3df,3pd) level of theory.

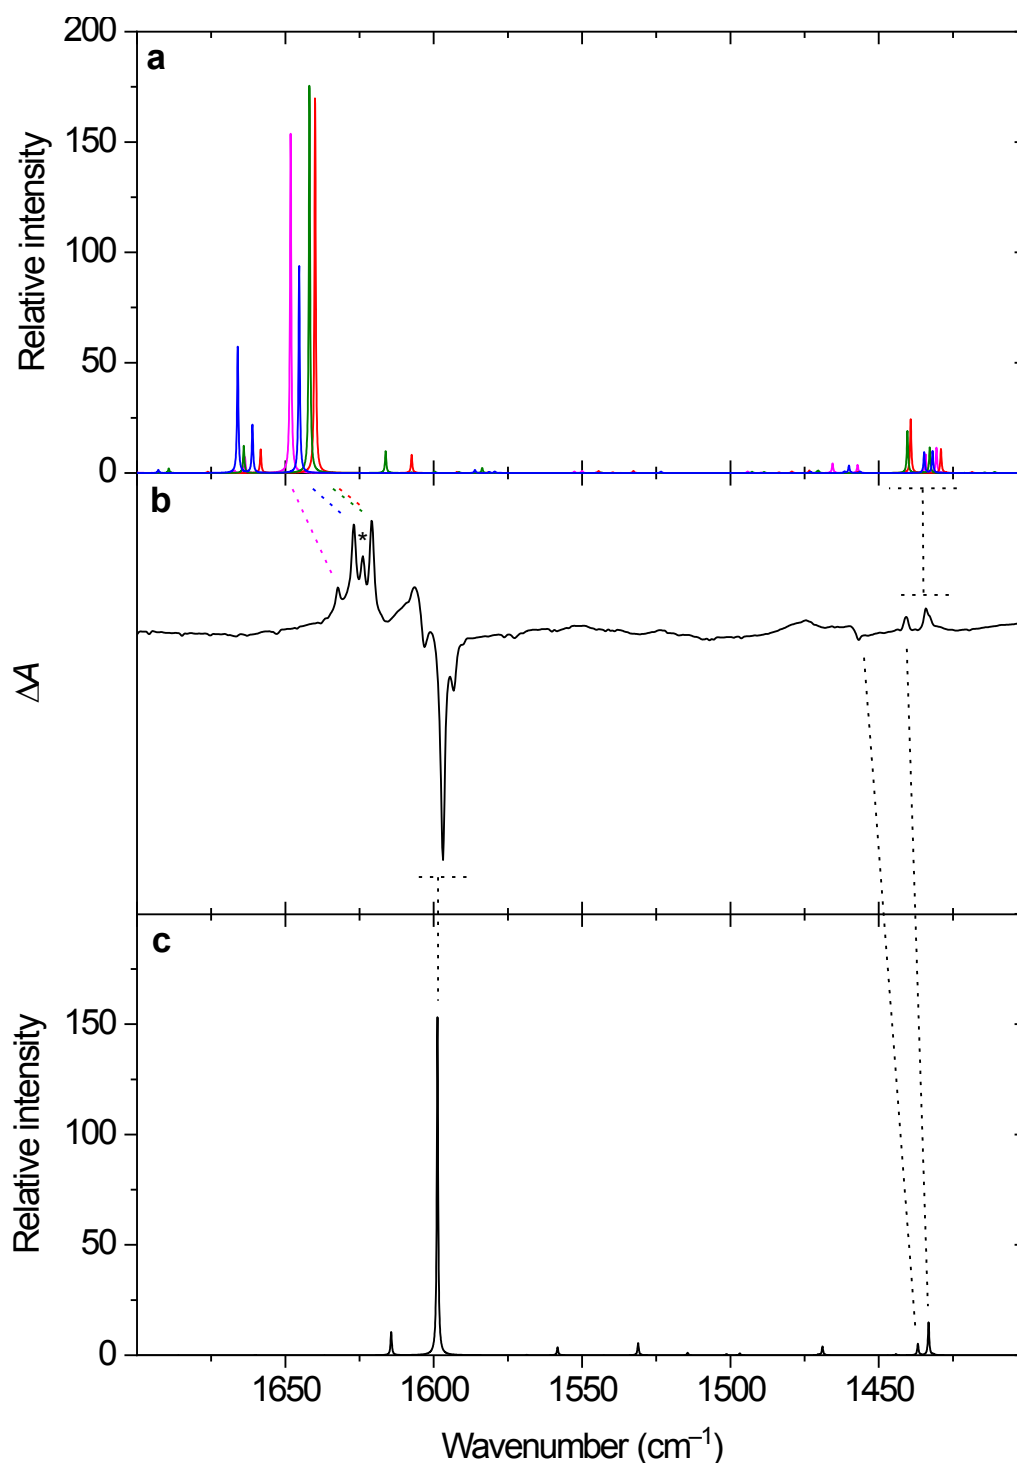

**Figure S6.** (a) Simulated spectra of the **aC** (red), **aT** (green), **sC** (pink), and **sT** (blue) imino-thiol isomers of thioacetamide. (b) Experimental mid-IR spectrum showing changes induced by UV irradiation of thioacetamide monomers isolated in an argon matrix at 11 K ( $\lambda = 265$  nm). Growing bands show upwards. (c) Simulated spectrum of the **Tn** conformer. The simulated spectra are based on the unscaled anharmonic vibrational frequencies and anharmonic IR intensities computed at the B3LYP/6-311++G(3df,3pd) level of theory. The asterisk in panel (b) marks the band of the matrix-isolated monomeric H<sub>2</sub>O impurity.

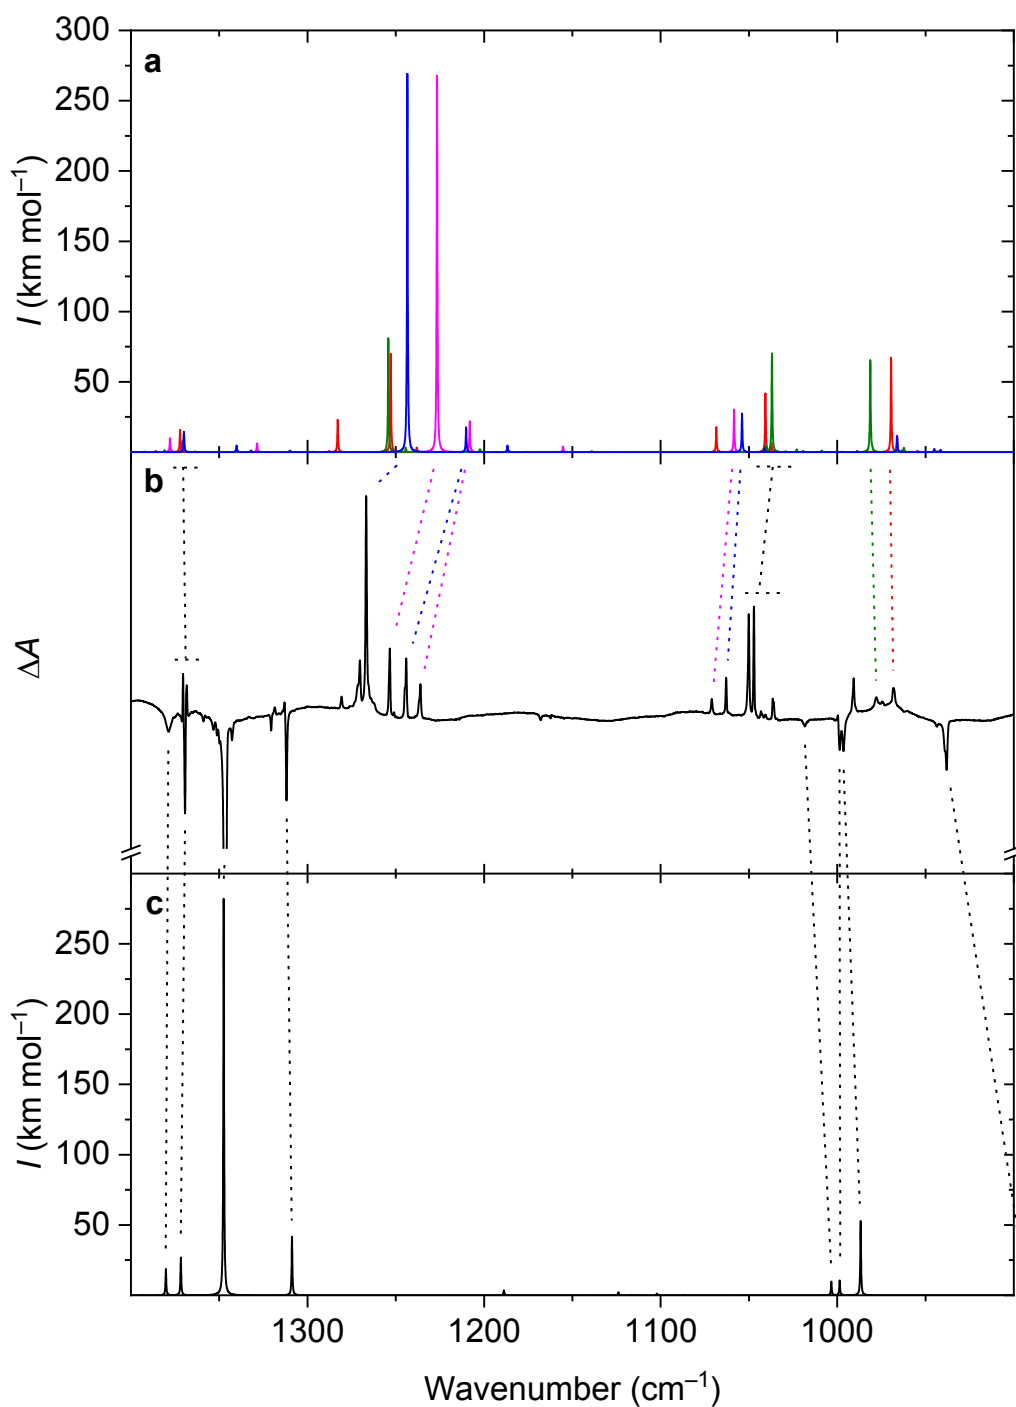

**Figure S7.** (a) Simulated spectra of the **aC** (red), **aT** (green), **sC** (pink), and **sT** (blue) imino-thiol isomers of thioacetamide. (b) Experimental mid-IR spectrum showing changes induced by UV irradiation of thioacetamide monomers isolated in an argon matrix at 11 K ( $\lambda = 265$  nm). Growing bands show upwards. (c) Simulated spectrum of the **T<sub>n</sub>** conformer. The simulated spectra are based on the unscaled anharmonic vibrational frequencies and anharmonic IR intensities computed at the B3LYP/6-311++G(3df,3pd) level of theory.



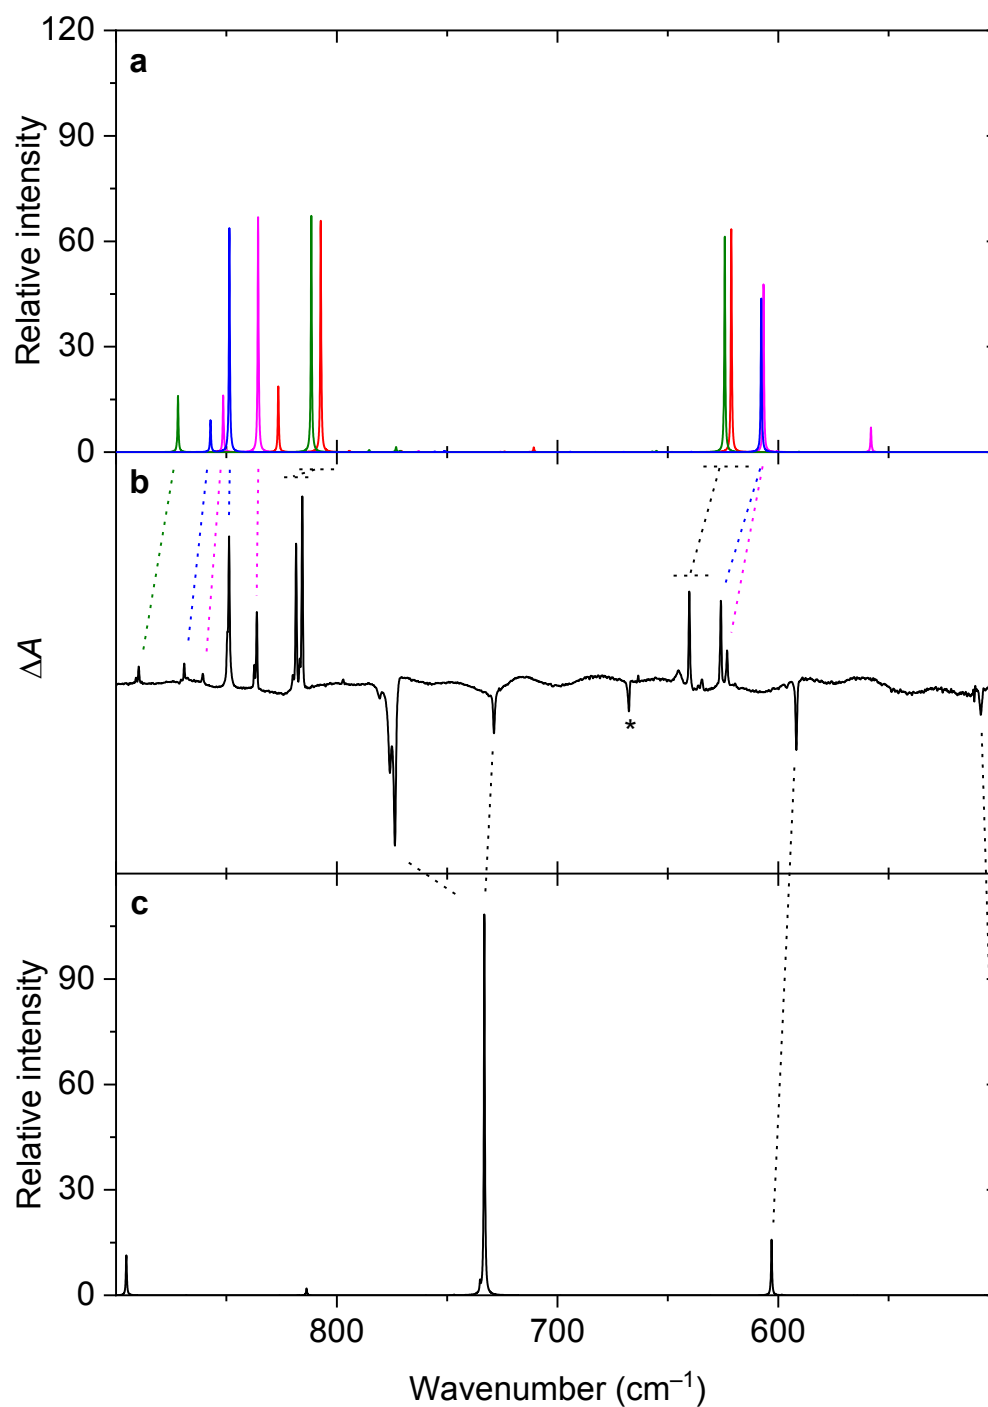

**Figure S8.** (a) Simulated spectra of the **aC** (red), **aT** (green), **sC** (pink), and **sT** (blue) imino-thiol isomers of thioacetamide. (b) Experimental mid-IR spectrum showing changes induced by UV irradiation of thioacetamide monomers isolated in an argon matrix at 11 K ( $\lambda = 265$  nm). Growing bands show upwards. (c) Simulated spectrum of the **Tn** conformer. The simulated spectra are based on the unscaled anharmonic vibrational frequencies and anharmonic IR intensities computed at the B3LYP/6-311++G(3df,3pd) level of theory. The asterisk marks the signal of the not perfectly compensated atmospheric CO<sub>2</sub> molecule.

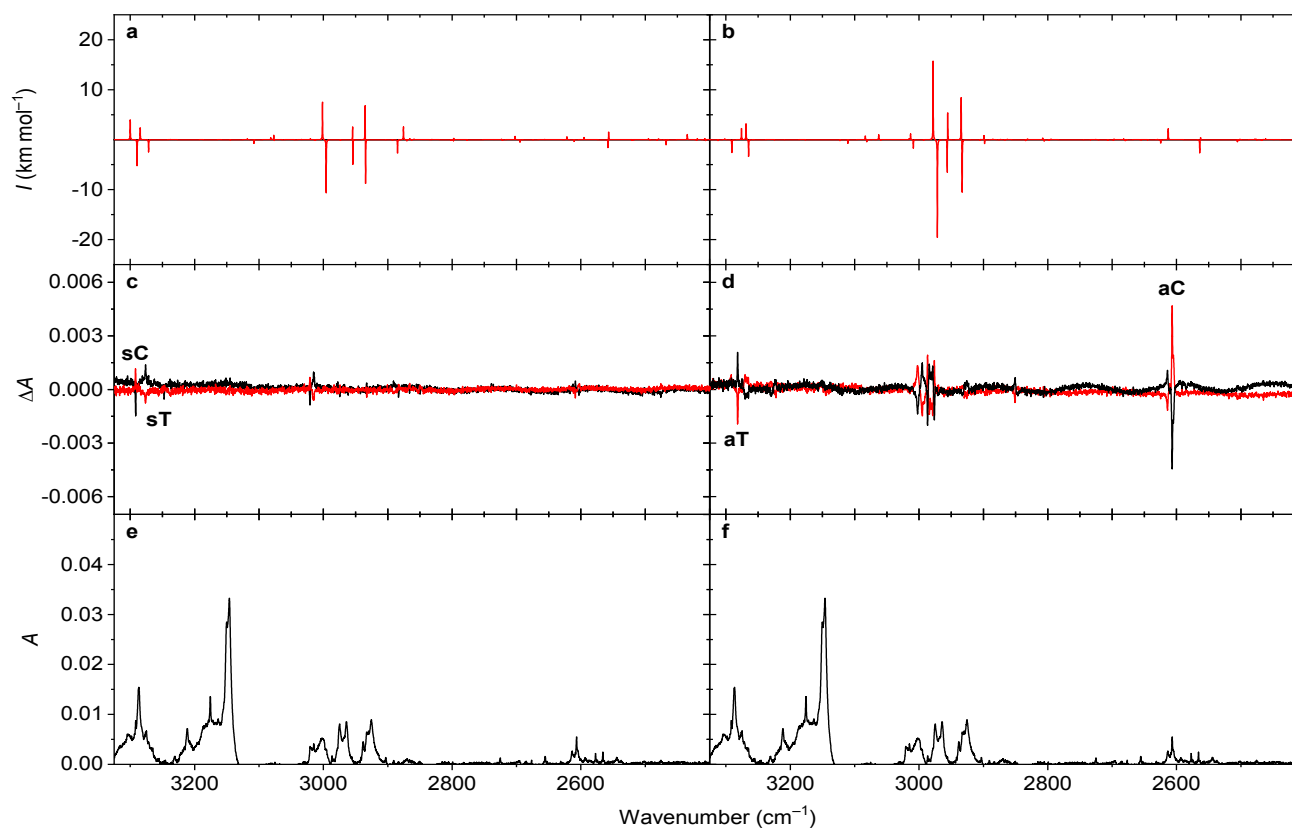

**Figure S9.** Simulated difference spectra of the *syn* (**a**) and *anti* (**b**) isomers; the growing bands are those of the **sC** and **aC**, respectively. (**c**) Experimental difference spectra of the *syn* isomers upon near-IR irradiation of  $6422\text{ cm}^{-1}$  (black) and  $6398\text{ cm}^{-1}$  (red). (**d**) Experimental difference spectra of the *anti* isomers upon near-IR irradiation of  $6378\text{ cm}^{-1}$  (black) and  $6405\text{ cm}^{-1}$  (red) (**e**, **f**) Mid-IR spectrum of the UV-irradiated sample. All panels visualize the spectral region of  $3325\text{--}2575\text{ cm}^{-1}$ ; the labels in panels (**c**) and (**d**) show the most intense bands of the respective isomers in the region.

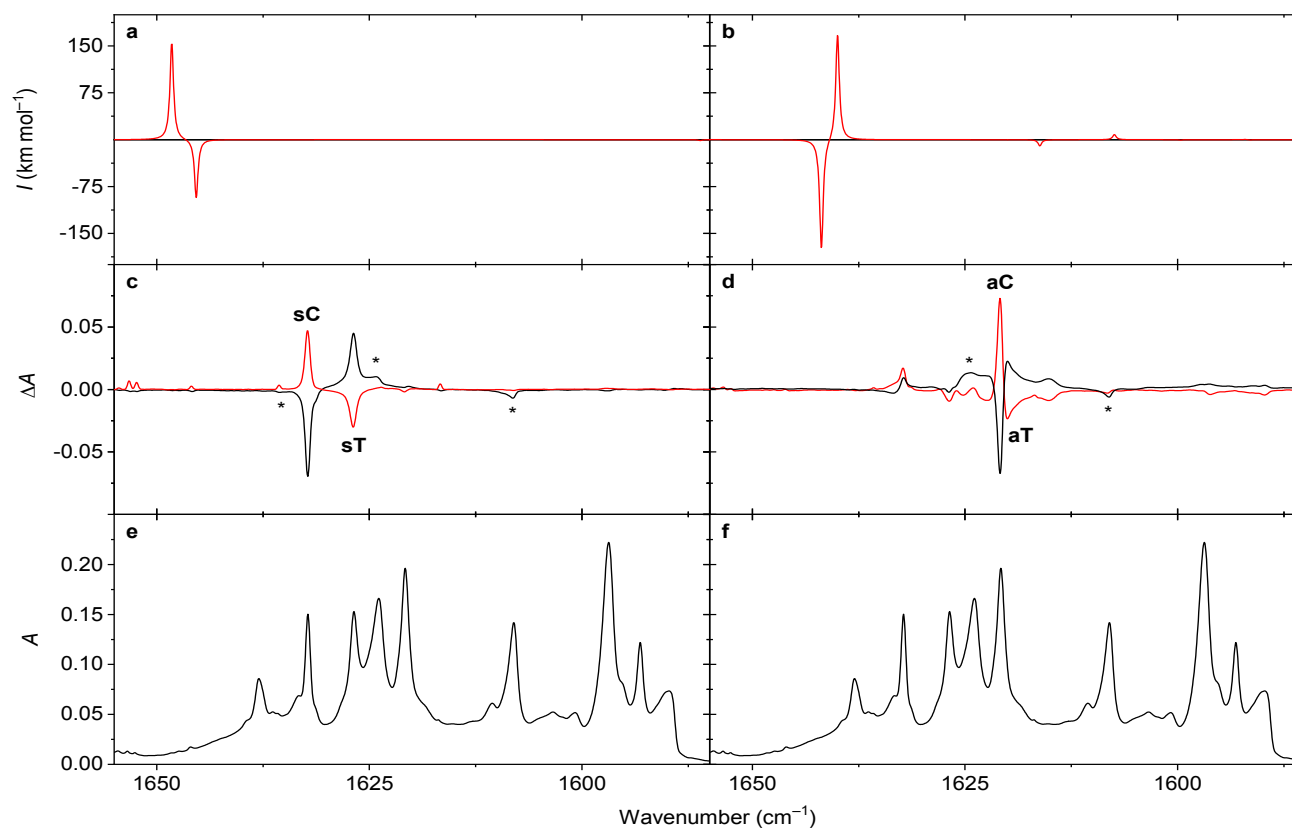

**Figure S10.** Simulated difference spectra of the *syn* (a) and *anti* (b) isomers; the growing bands are those of the **sC** and **aC**, respectively. (c) Experimental difference spectra of the *syn* isomers upon near-IR irradiation of 6422  $\text{cm}^{-1}$  (black) and 6398  $\text{cm}^{-1}$  (red). (d) Experimental difference spectra of the *anti* isomers upon near-IR irradiation of 6378  $\text{cm}^{-1}$  (black) and 6405  $\text{cm}^{-1}$  (red) (e, f) Mid-IR spectrum of the UV-irradiated sample. All panels visualize the spectral region of 1655–1585  $\text{cm}^{-1}$ ; the labels in panels (c) and (d) show the most intense bands of the respective isomers in the region. The asterisks in panels (c) and (d) mark the bands belonging to the matrix-isolated monomeric  $\text{H}_2\text{O}$  impurity.

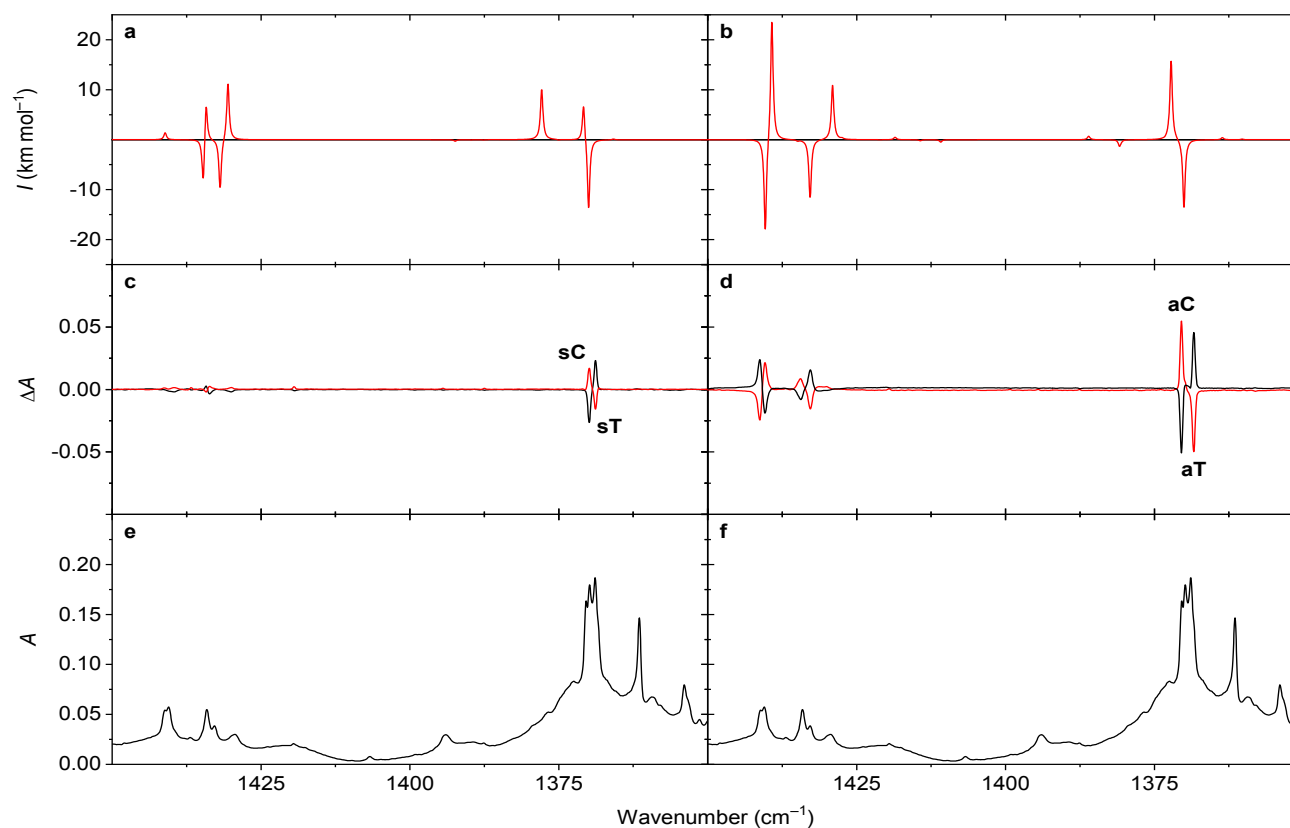

**Figure S11.** Simulated difference spectra of the *syn* (a) and *anti* (b) isomers; the growing bands are those of the sC and aC, respectively. (c) Experimental difference spectra of the *syn* isomers upon near-IR irradiation of 6422 cm<sup>-1</sup> (black) and 6398 cm<sup>-1</sup> (red). (d) Experimental difference spectra of the *anti* isomers upon near-IR irradiation of 6378 cm<sup>-1</sup> (black) and 6405 cm<sup>-1</sup> (red) (e, f) Mid-IR spectrum of the UV-irradiated sample. All panels visualize the spectral region of 1450–1300 cm<sup>-1</sup>; the labels in panels (c) and (d) show the most intense bands of the respective isomers in the region.

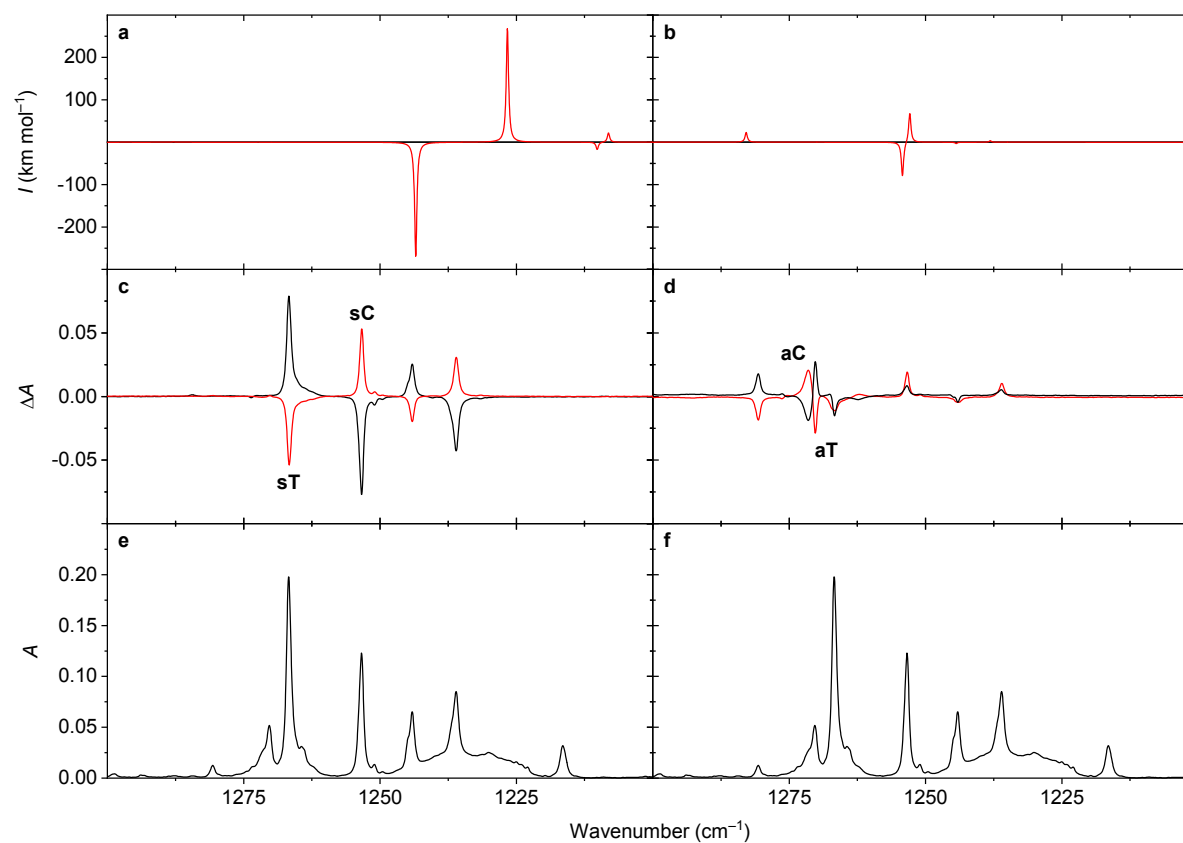

**Figure S12.** Simulated difference spectra of the *syn* (**a**) and *anti* (**b**) isomers; the growing bands are those of the **sC** and **aC**, respectively. (**c**) Experimental difference spectra of the *syn* isomers upon near-IR irradiation of 6422  $\text{cm}^{-1}$  (black) and 6398  $\text{cm}^{-1}$  (red). (**d**) Experimental difference spectra of the *anti* isomers upon near-IR irradiation of 6378  $\text{cm}^{-1}$  (black) and 6405  $\text{cm}^{-1}$  (red) (**e**, **f**) Mid-IR spectrum of the UV-irradiated sample. All panels visualize the spectral region of 1300–1200  $\text{cm}^{-1}$ ; the labels in panels (**c**) and (**d**) show the most intense bands of the respective isomers in the region.

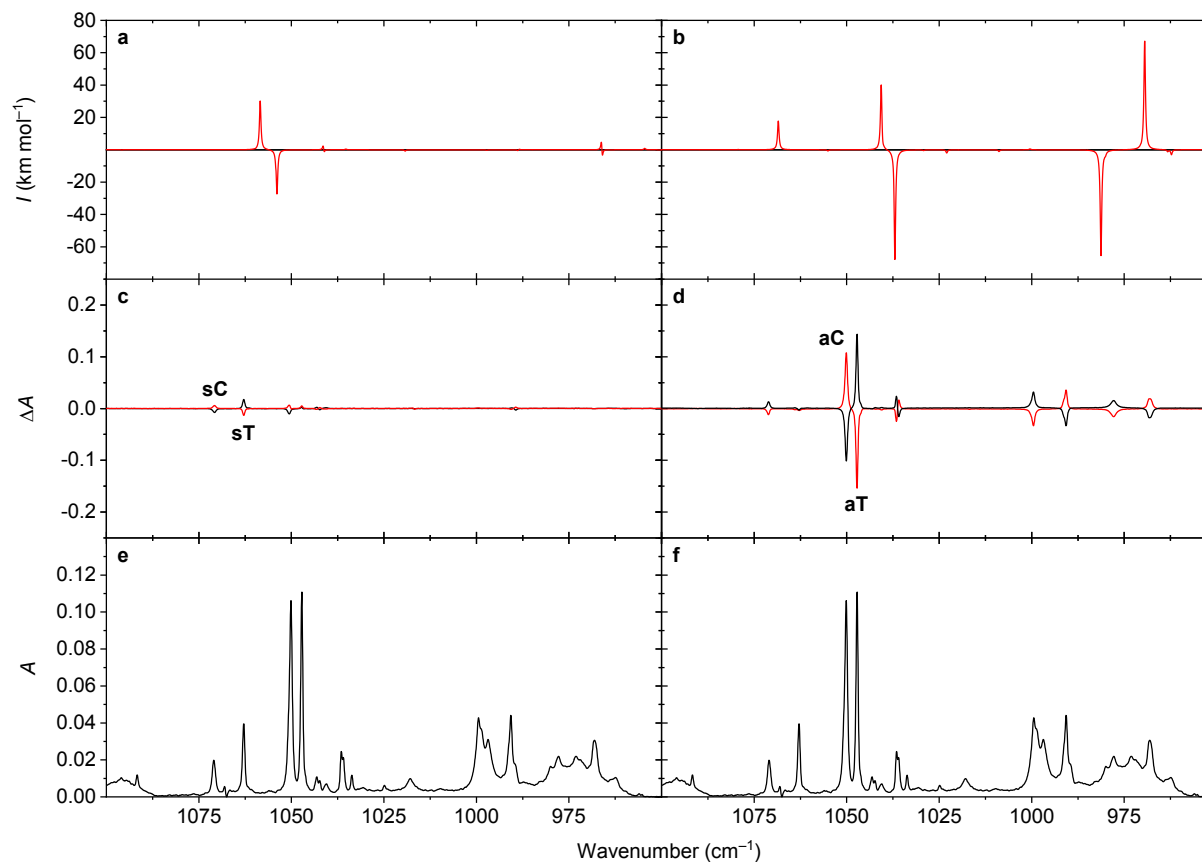

**Figure S13.** Simulated difference spectra of the *syn* (**a**) and *anti* (**b**) isomers; the growing bands are those of the **sC** and **aC**, respectively. (**c**) Experimental difference spectra of the *syn* isomers upon near-IR irradiation of  $6422\text{ cm}^{-1}$  (black) and  $6398\text{ cm}^{-1}$  (red). (**d**) Experimental difference spectra of the *anti* isomers upon near-IR irradiation of  $6378\text{ cm}^{-1}$  (black) and  $6405\text{ cm}^{-1}$  (red). (**e**, **f**) Mid-IR spectrum of the UV-irradiated sample. All panels visualize the spectral region of  $1100\text{--}950\text{ cm}^{-1}$ ; the labels in panels (**c**) and (**d**) show the most intense bands of the respective isomers in the region.

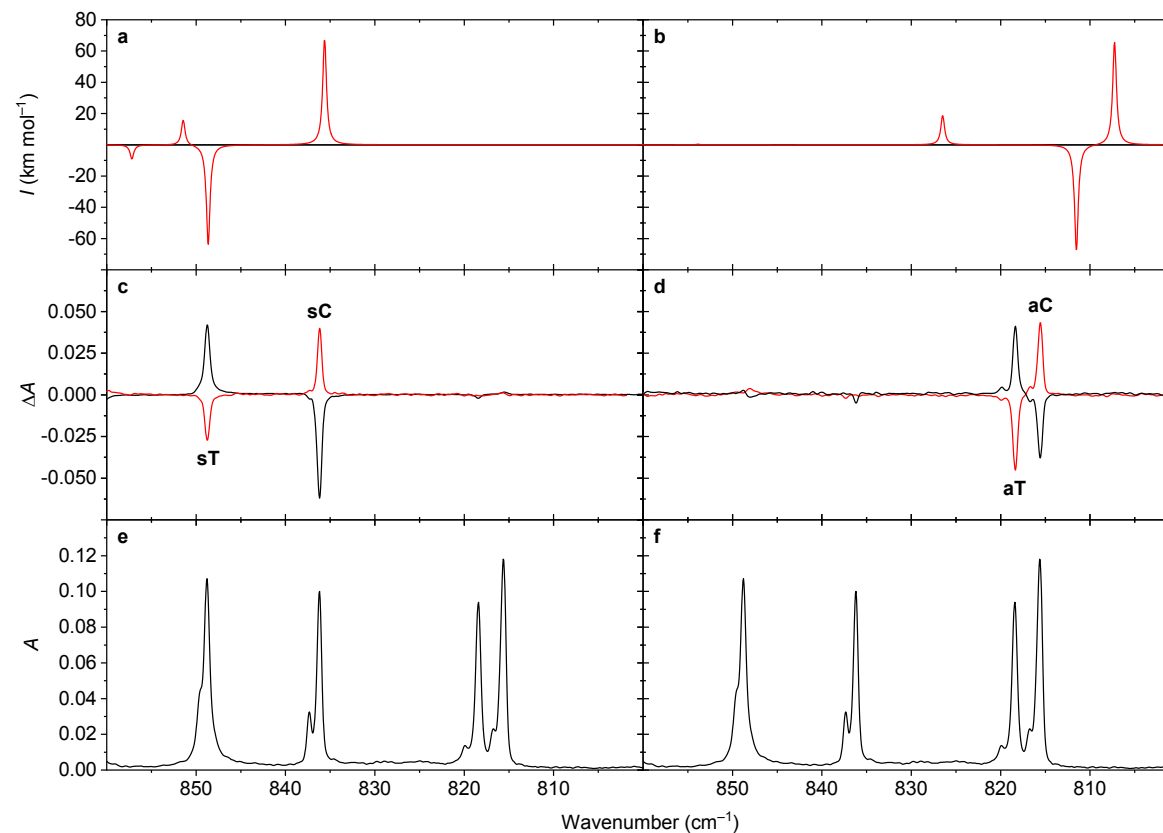

**Figure S14.** Simulated difference spectra of the *syn* (a) and *anti* (b) isomers; the growing bands are those of the **sC** and **aC**, respectively. (c) Experimental difference spectra of the *syn* isomers upon near-IR irradiation of 6422  $\text{cm}^{-1}$  (black) and 6398  $\text{cm}^{-1}$  (red). (d) Experimental difference spectra of the *anti* isomers upon near-IR irradiation of 6378  $\text{cm}^{-1}$  (black) and 6405  $\text{cm}^{-1}$  (red) (e, f) Mid-IR spectrum of the UV-irradiated sample. All panels visualize the spectral region of 860–800  $\text{cm}^{-1}$ ; the labels in panels (c) and (d) show the most intense bands of the respective isomers in the region.

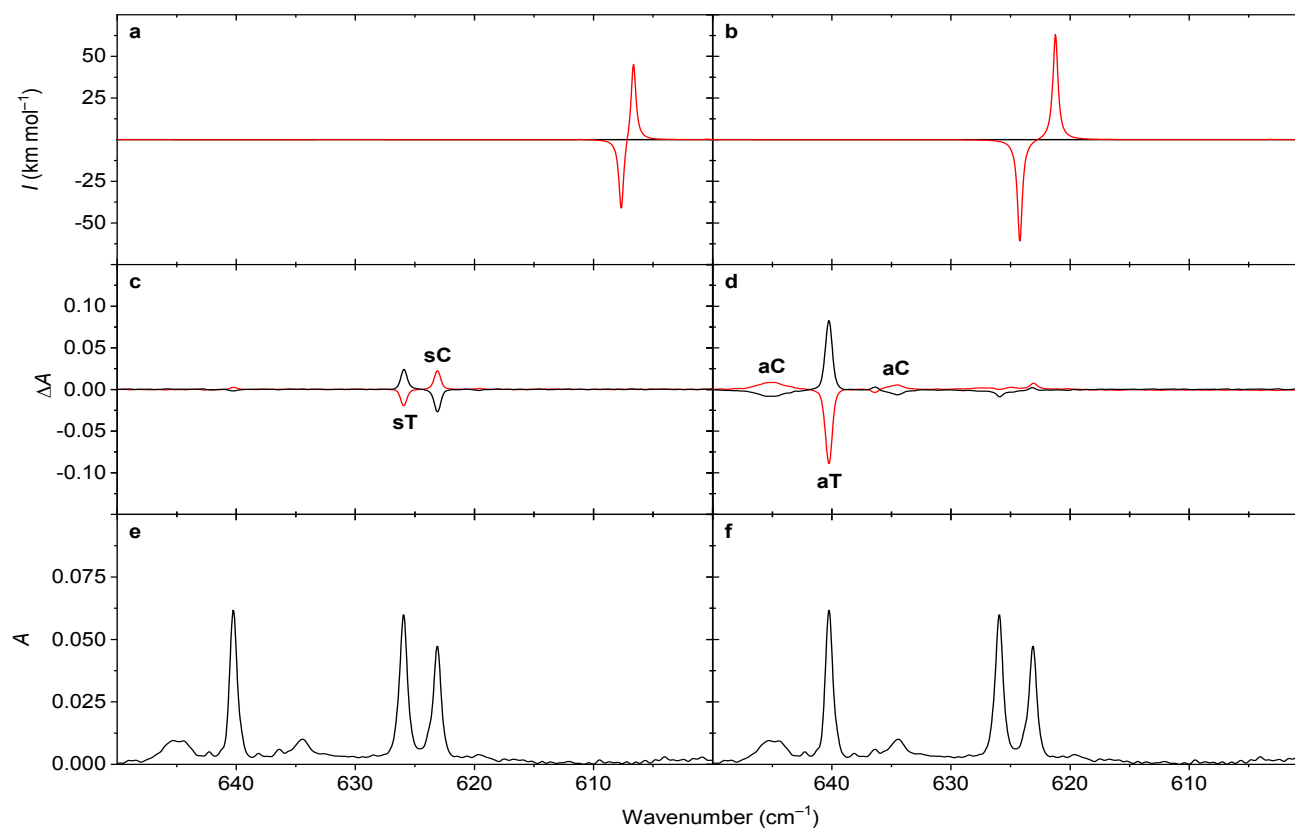

**Figure S15.** Simulated difference spectra of the *syn* (a) and *anti* (b) isomers; the growing bands are those of the **sC** and **aC**, respectively. (c) Experimental difference spectra of the *syn* isomers upon near-IR irradiation of 6422  $\text{cm}^{-1}$  (black) and 6398  $\text{cm}^{-1}$  (red). (d) Experimental difference spectra of the *anti* isomers upon near-IR irradiation of 6378  $\text{cm}^{-1}$  (black) and 6405  $\text{cm}^{-1}$  (red) (e, f) Mid-IR spectrum of the UV-irradiated sample. All panels visualize the spectral region of 650–600  $\text{cm}^{-1}$ ; the labels in panels (c) and (d) show the most intense bands of the respective isomers in the region



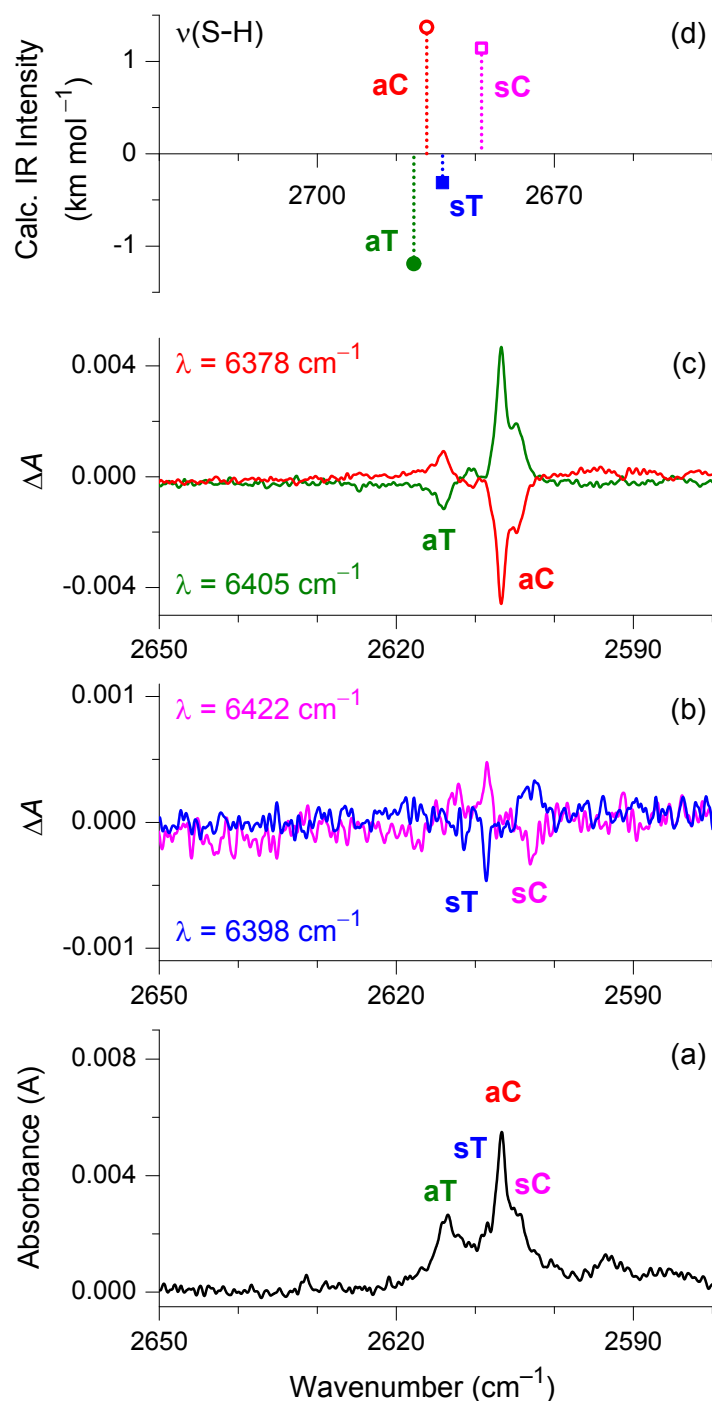

**Figure S16.** (a) Experimental mid-IR spectrum  $\nu(\text{SH})$  region, showing new bands of imino-thiol photoproducts growing upon UV irradiations of thioacetamide isolated in an argon matrix at 11 K; Experimental difference spectra showing changes in absorption ( $\Delta A$ ) upon subsequent irradiations of the sample with monochromatic near-IR laser light (b) at  $6398\text{ cm}^{-1}$  (blue) or at  $6422\text{ cm}^{-1}$  (pink); (c) at  $6405\text{ cm}^{-1}$  (green) or at  $6378\text{ cm}^{-1}$  (red); (d) harmonic wavenumbers (unscaled) and IR intensities of **sC** (pink, open squares) and **sT** (blue, closed squares), **aT** (green, closed circles), and **aC** (red, open circles) imino-thiol forms computed at the B3LYP/6-311++G(3df,3pd) level of theory. Intensities of **sT** and **aT** forms are multiplied by  $(-1)$ .

**Table S1.** Assignment of the FT-IR data of the thiol tautomers upon irradiation on the sample isolated in Ar matrix.

| Wavenumber (cm <sup>-1</sup> )  |               | $I_{\text{exp.}}^{\text{b}}$ | $I_{\text{theor.}}$<br>(km mol <sup>-1</sup> ) | UV | Change upon irradiation of <sup>c</sup> |                       |                       |                       | Symm. | Assignment <sup>d</sup>                         |                        |
|---------------------------------|---------------|------------------------------|------------------------------------------------|----|-----------------------------------------|-----------------------|-----------------------|-----------------------|-------|-------------------------------------------------|------------------------|
| Exp. <sup>a</sup>               | Theor.        |                              |                                                |    | 6405 cm <sup>-1</sup>                   | 6378 cm <sup>-1</sup> | 6422 cm <sup>-1</sup> | 6398 cm <sup>-1</sup> |       |                                                 |                        |
| 6422                            | 6434          | 0.3                          | 4.0                                            | +  | N/A <sup>c</sup>                        | N/A <sup>c</sup>      | N/A <sup>c</sup>      | N/A <sup>c</sup>      | A'    | 2v(NH)                                          | <b>sC</b> <sup>e</sup> |
| 6405                            | 6417          | 0.5                          | 4.6                                            | +  | N/A <sup>c</sup>                        | N/A <sup>c</sup>      | N/A <sup>c</sup>      | N/A <sup>c</sup>      | A'    | 2v(NH)                                          | <b>aT</b> <sup>e</sup> |
| 6398                            | 6413          | 0.3                          | 4.0                                            | +  | N/A <sup>c</sup>                        | N/A <sup>c</sup>      | N/A <sup>c</sup>      | N/A <sup>c</sup>      | A'    | 2v(NH)                                          | <b>sT</b> <sup>e</sup> |
| 6378                            | 6384          | 0.7                          | 5.0                                            | +  | N/A <sup>c</sup>                        | N/A <sup>c</sup>      | N/A <sup>c</sup>      | N/A <sup>c</sup>      | A'    | 2v(NH)                                          | <b>aC</b> <sup>e</sup> |
| 4543                            | 4546–<br>4525 | N/A                          | 1                                              | +  | N/A                                     | N/A                   | N/A                   | N/A                   | N/A   | N/A                                             | 'thiols' <sup>f</sup>  |
| 3292                            | 3300          | 1.7                          | 3.1                                            | +  | 0                                       | 0                     | –                     | +                     | A'    | v(NH)                                           | <b>sC</b>              |
| 3282                            | 3291          | 1.0                          | 2.1                                            | +  | –                                       | +                     | 0                     | 0                     | A'    | v(NH)                                           | <b>aT</b>              |
| 3276                            | 3289          | 2.4                          | 4.1                                            | +  | 0                                       | 0                     | +                     | –                     | A'    | v(NH)                                           | <b>sT</b>              |
| 3268                            | 3276          | 1.9                          | 1.8                                            | +  | +                                       | –                     | 0                     | 0                     | A'    | v(NH)                                           | <b>aC</b>              |
| 3248                            | 3285          | 0.8                          | 1.9                                            | +  | 0                                       | 0                     | –                     | +                     | A'    | 2v(C=N)                                         | <b>sC</b>              |
| 3021                            | 3001          | 1.6                          | 6.0                                            | +  | 0                                       | 0                     | –                     | +                     | A'    | v <sub>as</sub> (CH <sub>3</sub> )              | <b>sC</b>              |
| 3015                            | 2996          | 3.1                          | 8.4                                            | +  | 0                                       | 0                     | –                     | +                     | A'    | v <sub>as</sub> (CH <sub>3</sub> )              | <b>sT</b>              |
| 3002,<br>2987,<br>2976,<br>2851 | 2971          | N/A                          | 15                                             | +  | –                                       | +                     | 0                     | 0                     | A'    | v <sub>as</sub> (CH <sub>3</sub> ) <sup>d</sup> |                        |
|                                 | 2956          | N/A                          | 6.0                                            | +  | –                                       | +                     | 0                     | 0                     | A''   | v <sub>as</sub> (CH <sub>3</sub> ) <sup>d</sup> | <b>aT</b>              |
|                                 | 2933          | N/A                          | 8.4                                            | +  | –                                       | +                     | 0                     | 0                     | A'    | v <sub>s</sub> (CH <sub>3</sub> ) <sup>d</sup>  |                        |

|                                 |                      |                   |                  |   |   |   |   |   |     |                                                   |                       |
|---------------------------------|----------------------|-------------------|------------------|---|---|---|---|---|-----|---------------------------------------------------|-----------------------|
| 2995,<br>2984,<br>2981,<br>2979 | 2978<br>2956<br>2935 | N/A<br>N/A<br>N/A | 12<br>5.2<br>6.8 | + | - | - | 0 | 0 | A'  | $\nu_{\text{as}}(\text{CH}_3)^{\text{d}}$         |                       |
|                                 |                      |                   |                  | + | - | - | 0 | 0 | A'' | $\nu_{\text{as}}(\text{CH}_3)^{\text{d}}$         | <b>aC</b>             |
|                                 |                      |                   |                  | + | - | - | 0 | 0 | A'  | $\nu_{\text{s}}(\text{CH}_3)^{\text{d}}$          |                       |
| 2883,<br>2866                   | 2954<br>2935         | N/A<br>N/A        | 6.6<br>6.3       | + | 0 | 0 | - | + | A'' | $\nu_{\text{as}}(\text{CH}_3)^{\text{d}}$         | <b>sC</b>             |
|                                 |                      |                   |                  | + | 0 | 0 | - | + | A'  | $\nu_{\text{s}}(\text{CH}_3)^{\text{d}}$          |                       |
| 2933,<br>2891                   | 2954<br>2937         | N/A<br>N/A        | 7.9<br>7.7       | + | 0 | 0 | - | + | A'' | $\nu_{\text{as}}(\text{CH}_3)^{\text{d}}$         | <b>sT</b>             |
|                                 |                      |                   |                  | + | 0 | 0 | - | + | A'  | $\nu_{\text{s}}(\text{CH}_3)^{\text{d}}$          |                       |
| 2614                            | 2564                 | 0.7               | 2.1              | + | - | + | 0 | 0 | A'  | $\nu(\text{SH})$                                  | <b>aT</b>             |
| 2609                            | 2558                 | 0.7               | 1.4              | + | 0 | 0 | + | - | A'  | $\nu(\text{SH})$                                  | <b>sT</b>             |
| 2607                            | 2563                 | 5.2               | 0.4              | + | + | - | 0 | 0 | A'  | $\nu(\text{SH})$                                  | <b>aC</b>             |
| 2603                            | 2557                 | 3.1               | 1.3              | + | 0 | 0 | - | + | A'  | $\nu(\text{SH})$                                  | <b>sC</b>             |
| 2476                            | 2435                 | 0.6               | 0.8              | + | 0 | 0 | - | + | A'  | $2\beta(\text{NH})$                               | <b>sC</b>             |
| 2416                            | 2404                 | 0.3               | 0.2              | + | + | - | 0 | 0 | A'' | $\rho(\text{CH}_3)+\beta_{\text{s}}(\text{CH}_3)$ | <b>aC</b>             |
| 1632                            | 1648                 | 130               | 122              | + | 0 | 0 | - | + | A'  | $\nu(\text{C}=\text{N})$                          | <b>sC</b>             |
| 1627                            | 1645                 | 168               | 74               | + | 0 | 0 | + | - | A'  | $\nu(\text{C}=\text{N})$                          | <b>sT</b>             |
| 1621                            | 1642                 | 145               | 139              | + | + | + | 0 | 0 | A'  | $\nu(\text{C}=\text{N})$                          | <b>aT</b>             |
| 1620sh                          | 1640                 | 65                | 134              | + | - | - | 0 | 0 | A'  | $\nu(\text{C}=\text{N})$                          | <b>aC</b>             |
| 1441                            | 1440                 | 20                | 15               | + | - | + | 0 | 0 | A'  | $\beta_{\text{as}}(\text{CH}_3)$                  | <b>aT</b>             |
| 1440                            | 1439                 | 26                | 19               | + | + | - | 0 | 0 | A'  | $\beta_{\text{as}}(\text{CH}_3)$                  | <b>aC</b>             |
| 1434,                           | 1429                 | 36                | 8.6              | + | + | - | 0 | 0 | A'' | $\beta_{\text{as}}(\text{CH}_3)$                  | <b>aC<sup>g</sup></b> |

|        |      |     |     |   |   |   |   |   |     |                           |                       |  |
|--------|------|-----|-----|---|---|---|---|---|-----|---------------------------|-----------------------|--|
| 1430   |      |     |     |   |   |   |   |   |     |                           |                       |  |
| 1433   | 1433 | 29  | 9.0 | + | - | + | 0 | 0 | A'' | $\beta_{as}(\text{CH}_3)$ | <b>aT<sup>g</sup></b> |  |
| 1371   | 1372 | 31  | 12  | + | + | - | 0 | 0 | A'  | $\beta_s(\text{CH}_3)$    | <b>aC</b>             |  |
| 1370sh | 1371 | 56  | 6.0 | + | 0 | 0 | - | + | A'  | $\beta_s(\text{CH}_3)$    | <b>sC</b>             |  |
| 1368   | 1370 | 51  | 11  | + | 0 | 0 | + | - | A'  | $\beta_s(\text{CH}_3)$    | <b>sT</b>             |  |
| 1368sh | 1370 | 32  | 11  | + | - | + | 0 | 0 | A'  | $\beta_s(\text{CH}_3)$    | <b>aT</b>             |  |
| 1318   | N/A  | N/A | N/A | + | - | + | 0 | 0 | N/A | N/A                       | <b>aT</b>             |  |
| 1313   | N/A  | N/A | N/A | + | + | - | 0 | 0 | N/A | N/A                       | <b>aC</b>             |  |
| 1281   | 1254 | 42  | 64  | + | - | + | 0 | 0 | A'  | $\beta(\text{NH})$        | <b>aT</b>             |  |
| 1272sh | 1253 | 41  | 55  | + | + | - | 0 | 0 | A'  | $\beta(\text{NH})$        | <b>aC</b>             |  |
| 1270   | 1244 | 10  | 2.5 | + | - | + | 0 | 0 | A'  | $2\nu(\text{C-S})?$       | <b>aT</b>             |  |
| 1267   | 1243 | 244 | 212 | + | - | + | + | - | A'  | $\beta(\text{NH})$        | <b>sT</b>             |  |
| 1254   | 1227 | 107 | 211 | + | + | - | - | + | A'  | $\beta(\text{NH})$        | <b>sC</b>             |  |
| 1244   | 1210 | 54  | 14  | + | - | + | + | - | A'  | $2\nu(\text{C-S})$        | <b>sT</b>             |  |
| 1236   | 1208 | 74  | 17  | + | + | - | - | + | A'  | $2\nu(\text{C-S})$        | <b>sC</b>             |  |
| 1072sh | N/A  | N/A | N/A | + | - | + | 0 | 0 | N/A | N/A                       | <b>aT</b>             |  |
| 1070   | 1058 | 4.8 | 24  | + | 0 | 0 | - | + | A'  | $\rho(\text{CH}_3)$       | <b>sC</b>             |  |
| 1063   | 1054 | 29  | 22  | + | - | 0 | + | - | A'  | $\rho(\text{CH}_3)$       | <b>sT</b>             |  |
| 1051sh | N/A  | N/A | N/A | + | 0 | 0 | - | + | N/A | N/A                       | <b>sC</b>             |  |
| 1050   | 1041 | 77  | 33  | + | + | - | 0 | 0 | A'  | $\rho(\text{CH}_3)$       | <b>aC</b>             |  |

|               |      |     |     |   |   |   |   |   |     |                     |           |
|---------------|------|-----|-----|---|---|---|---|---|-----|---------------------|-----------|
| 1047          | 1037 | 68  | 55  | + | - | + | 0 | 0 | A'  | $\rho(\text{CH}_3)$ | <b>aT</b> |
| 1043,<br>1041 | 1042 | 8.3 | 2.3 | + | 0 | 0 | + | - | A'' | $\rho(\text{CH}_3)$ | <b>sT</b> |
| 1042sh        | 1042 | 2.8 | 3.0 | + | 0 | 0 | - | + | A'' | $\rho(\text{CH}_3)$ | <b>sC</b> |
| 1037          | 1040 | 12  | 3.8 | + | - | + | 0 | 0 | A'' | $\rho(\text{CH}_3)$ | <b>aT</b> |
| 1036          | 1037 | 15  | 5.0 | + | + | - | 0 | 0 | A'' | $\rho(\text{CH}_3)$ | <b>aC</b> |
| 1000sh        | 981  | 19  | 51  | + | - | + | 0 | 0 | A'  | $\nu(\text{C-C})?$  | <b>aT</b> |
| 991           | 969  | 38  | 53  | + | + | - | 0 | 0 | A'  | $\nu(\text{C-C})?$  | <b>aC</b> |
| 978           | 981  | 16  | 51  | + | - | + | 0 | 0 | A'  | $\nu(\text{C-C})$   | <b>aT</b> |
| 968           | 969  | 20  | 53  | + | + | - | 0 | 0 | A'  | $\nu(\text{C-C})$   | <b>aC</b> |
| 891, 890      | 872  | 9.0 | 13  | + | - | + | 0 | 0 | A'  | $\beta(\text{SH})$  | <b>aT</b> |
| 869           | 857  | 8.0 | 7.1 | + | 0 | 0 | + | - | A'  | $\beta(\text{SH})$  | <b>sT</b> |
| 860           | 851  | 10  | 13  | + | 0 | 0 | - | + | A'  | $\beta(\text{SH})$  | <b>sC</b> |
| 850sh,<br>849 | 849  | 108 | 50  | + | 0 | 0 | + | - | A'' | $\tau(\text{NH})$   | <b>sT</b> |
| 849           | 827  | N/A | 15  | + | + | - | 0 | 0 | A'  | $\beta(\text{SH})$  | <b>aC</b> |
| 837, 836      | 836  | 64  | 53  | + | 0 | 0 | - | + | A'' | $\tau(\text{NH})$   | <b>sC</b> |
| 820, 818      | 812  | 65  | 53  | + | - | + | 0 | 0 | A'' | $\tau(\text{NH})$   | <b>aT</b> |
| 817, 816      | 807  | 83  | 52  | + | + | - | 0 | 0 | A'' | $\tau(\text{NH})$   | <b>aC</b> |
| 645, 635      | 621  | 30  | 50  | + | + | - | 0 | 0 | A'  | $\nu(\text{C-S})$   | <b>aC</b> |
| 640           | 624  | 36  | 49  | + | - | + | 0 | 0 | A'  | $\nu(\text{C-S})$   | <b>aT</b> |

|     |     |     |     |   |   |   |   |   |    |               |           |
|-----|-----|-----|-----|---|---|---|---|---|----|---------------|-----------|
| 626 | 608 | 43  | 35  | + | 0 | 0 | + | - | A' | v(C-S)        | <b>sT</b> |
| 623 | 607 | 32  | 37  | + | 0 | 0 | - | + | A' | v(C-S)        | <b>sC</b> |
| 446 | 446 | 11  | 5.1 | + | + | - | 0 | 0 | A' | $\beta$ (NCS) | <b>aC</b> |
| 443 | 437 | 11  | 12  | + | 0 | 0 | - | + | A' | $\beta$ (NCS) | <b>sC</b> |
| 431 | 430 | 2.2 | 1.7 | + | - | + | 0 | 0 | A' | $\beta$ (NCS) | <b>aT</b> |
| 421 | 5.4 | 416 | 13  | + | 0 | 0 | + | - | A' | $\beta$ (NCS) | <b>sT</b> |

<sup>a</sup> sh: shoulder

<sup>b</sup> Normalized experimental band areas. The values were obtained by multiplying the integrated band areas with the sum of the theoretical IR intensities then divided by the sum of the experimental band areas.

<sup>b</sup> -/+ : decrease/increase of signal, 0: no change upon irradiation

<sup>c</sup> v: stretching,  $\beta$ : bending,  $\rho$ : rocking,  $\omega$ : wagging,  $\tau$ : torsional, s: symmetric, as: antisymmetric vibrations, ?: tentative assignment.

<sup>d</sup> Spectral assignment made based on the results of near-IR irradiation experiments.

<sup>e</sup> Unequivocal assignment could not be done due to extensive overlap.

<sup>f</sup> Contribution from *syn*-thiols cannot be excluded.

For the Cartesian coordinates of the isomers at the B3LYP/6-311++G(3df,3pd) level of theory, please refer to the Electronic Supplementary Information of S. Góbi, C. M. Nunes, I. Reva, G. Tarczay and R. Fausto, *Phys. Chem. Chem. Phys.*, 2019, **21**, 17063–17071.

**Table S2.** Unscaled harmonic ( $E_{\text{harm}}$ , in  $\text{cm}^{-1}$ ) and anharmonic ( $E_{\text{anharm}}$ , in  $\text{cm}^{-1}$ ) frequencies and absolute harmonic ( $I_{\text{harm}}$ , in  $\text{km mol}^{-1}$ ) and anharmonic ( $I_{\text{anharm}}$ , in  $\text{km mol}^{-1}$ ) IR intensities of the **Tn** tautomer of thioacetamide as computed at the B3LYP/6-311++G(3df,3pd) level of theory.

| Fundamental Bands |                   |                     |                   |                     |
|-------------------|-------------------|---------------------|-------------------|---------------------|
| Mode (Quanta)     | $E_{\text{harm}}$ | $E_{\text{anharm}}$ | $I_{\text{harm}}$ | $I_{\text{anharm}}$ |
| 1(1)              | 3694.415          | 3530.798            | 37.285            | 24.599              |
| 2(1)              | 3564.732          | 3413.988            | 42.076            | 20.607              |
| 3(1)              | 3166.228          | 3017.297            | 1.524             | 2.173               |
| 4(1)              | 3021.311          | 2916.398            | 18.852            | 18.706              |
| 5(1)              | 1637.565          | 1598.735            | 154.992           | 121.347             |
| 6(1)              | 1481.547          | 1433.216            | 10.382            | 11.749              |
| 7(1)              | 1403.887          | 1371.743            | 38.282            | 21.159              |
| 8(1)              | 1376.526          | 1347.476            | 244.911           | 222.187             |
| 9(1)              | 1322.229          | 1308.790            | 40.785            | 32.914              |
| 10(1)             | 1021.885          | 998.631             | 24.153            | 8.344               |
| 11(1)             | 987.730           | 986.736             | 16.004            | 41.814              |
| 12(1)             | 732.480           | 735.087             | 7.616             | 2.219               |
| 13(1)             | 427.289           | 433.558             | 1.183             | 1.795               |
| 14(1)             | 378.204           | 382.911             | 1.983             | 2.081               |
| 15(1)             | 3071.695          | 2932.357            | 8.246             | 6.348               |
| 16(1)             | 1488.043          | 1436.821            | 8.218             | 4.100               |
| 17(1)             | 1037.639          | 1008.463            | 0.220             | 0.049               |
| 18(1)             | 612.911           | 603.021             | 5.330             | 12.508              |
| 19(1)             | 518.057           | 500.505             | 3.758             | 12.614              |
| 20(1)             | 337.277           | 327.222             | 157.389           | 141.700             |
| 21(1)             | 31.807            | 113.138             | 0.008             | 2.610               |
| Overtones         |                   |                     |                   |                     |
| Mode (Quanta)     | $E_{\text{harm}}$ | $E_{\text{anharm}}$ | $I_{\text{harm}}$ | $I_{\text{anharm}}$ |
| 1(2)              | 7388.831          | 6983.524            |                   | 2.304               |
| 2(2)              | 7129.464          | 6756.629            |                   | 2.200               |
| 3(2)              | 6332.455          | 5930.712            |                   | 0.498               |
| 4(2)              | 6042.623          | 5735.997            |                   | 0.166               |
| 5(2)              | 3275.129          | 3177.657            |                   | 1.779               |
| 6(2)              | 2963.094          | 2838.727            |                   | 0.057               |
| 7(2)              | 2807.773          | 2726.752            |                   | 0.624               |
| 8(2)              | 2753.052          | 2678.871            |                   | 0.354               |
| 9(2)              | 2644.459          | 2612.156            |                   | 0.263               |

|                   |                   |                     |                   |                     |
|-------------------|-------------------|---------------------|-------------------|---------------------|
| 10(2)             | 2043.770          | 1995.308            |                   | 0.083               |
| 11(2)             | 1975.459          | 1937.588            |                   | 1.203               |
| 12(2)             | 1464.960          | 1468.979            |                   | 3.147               |
| 13(2)             | 854.579           | 868.195             |                   | 0.045               |
| 14(2)             | 756.408           | 766.603             |                   | 0.003               |
| 15(2)             | 6143.391          | 5799.723            |                   | 0.611               |
| 16(2)             | 2976.086          | 2880.742            |                   | 0.119               |
| 17(2)             | 2075.277          | 2019.200            |                   | 0.035               |
| 18(2)             | 1225.822          | 1188.788            |                   | 2.810               |
| 19(2)             | 1036.114          | 1003.334            |                   | 7.717               |
| 20(2)             | 674.555           | 733.109             |                   | 85.209              |
| 21(2)             | 63.614            | 277.368             |                   | 0.390               |
| Combination Bands |                   |                     |                   |                     |
| Mode (Quanta)     | $E_{\text{harm}}$ | $E_{\text{anharm}}$ | $I_{\text{harm}}$ | $I_{\text{anharm}}$ |
| 2(1) 1(1)         | 7259.147          | 6804.575            |                   | 2.144               |
| 3(1) 1(1)         | 6860.643          | 6548.364            |                   | 0.000               |
| 3(1) 2(1)         | 6730.960          | 6431.414            |                   | 0.000               |
| 4(1) 1(1)         | 6715.727          | 6423.664            |                   | 0.005               |
| 4(1) 2(1)         | 6586.043          | 6306.707            |                   | 0.014               |
| 4(1) 3(1)         | 6187.539          | 5892.698            |                   | 0.065               |
| 5(1) 1(1)         | 5331.980          | 5108.627            |                   | 1.951               |
| 5(1) 2(1)         | 5202.297          | 5007.559            |                   | 0.385               |
| 5(1) 3(1)         | 4803.792          | 4615.771            |                   | 0.006               |
| 5(1) 4(1)         | 4658.876          | 4490.475            |                   | 0.012               |
| 6(1) 1(1)         | 5175.963          | 4963.644            |                   | 0.105               |
| 6(1) 2(1)         | 5046.279          | 4846.745            |                   | 0.004               |
| 6(1) 3(1)         | 4647.775          | 4438.984            |                   | 0.136               |
| 6(1) 4(1)         | 4502.858          | 4308.273            |                   | 0.031               |
| 6(1) 5(1)         | 3119.112          | 3031.051            |                   | 0.064               |
| 7(1) 1(1)         | 5098.302          | 4902.505            |                   | 0.011               |
| 7(1) 2(1)         | 4968.619          | 4785.467            |                   | 0.023               |
| 7(1) 3(1)         | 4570.114          | 4384.466            |                   | 0.192               |
| 7(1) 4(1)         | 4425.198          | 4274.601            |                   | 0.117               |
| 7(1) 5(1)         | 3041.451          | 2969.493            |                   | 0.379               |
| 7(1) 6(1)         | 2885.434          | 2800.700            |                   | 0.231               |
| 8(1) 1(1)         | 5070.941          | 4872.883            |                   | 0.243               |
| 8(1) 2(1)         | 4941.258          | 4755.138            |                   | 0.014               |
| 8(1) 3(1)         | 4542.754          | 4358.598            |                   | 0.176               |
| 8(1) 4(1)         | 4397.837          | 4235.615            |                   | 0.453               |
| 8(1) 5(1)         | 3014.091          | 2936.856            |                   | 0.921               |
| 8(1) 6(1)         | 2858.073          | 2771.802            |                   | 0.474               |
| 8(1) 7(1)         | 2780.413          | 2710.710            |                   | 0.052               |
| 9(1) 1(1)         | 5016.645          | 4834.883            |                   | 2.454               |
| 9(1) 2(1)         | 4886.962          | 4718.703            |                   | 0.605               |
| 9(1) 3(1)         | 4488.457          | 4325.188            |                   | 0.158               |



|       |       |          |          |  |       |
|-------|-------|----------|----------|--|-------|
| 9(1)  | 4(1)  | 4343.541 | 4199.951 |  | 0.059 |
| 9(1)  | 5(1)  | 2959.794 | 2901.160 |  | 0.503 |
| 9(1)  | 6(1)  | 2803.777 | 2740.419 |  | 0.197 |
| 9(1)  | 7(1)  | 2726.116 | 2677.130 |  | 0.473 |
| 9(1)  | 8(1)  | 2698.756 | 2649.296 |  | 0.779 |
| 10(1) | 1(1)  | 4716.300 | 4530.232 |  | 0.004 |
| 10(1) | 2(1)  | 4586.617 | 4412.925 |  | 0.012 |
| 10(1) | 3(1)  | 4188.113 | 4006.874 |  | 0.046 |
| 10(1) | 4(1)  | 4043.196 | 3889.925 |  | 0.091 |
| 10(1) | 5(1)  | 2659.450 | 2596.027 |  | 0.213 |
| 10(1) | 6(1)  | 2503.432 | 2428.543 |  | 0.377 |
| 10(1) | 7(1)  | 2425.772 | 2367.405 |  | 0.479 |
| 10(1) | 8(1)  | 2398.411 | 2338.437 |  | 0.307 |
| 10(1) | 9(1)  | 2344.115 | 2304.875 |  | 0.353 |
| 11(1) | 1(1)  | 4682.145 | 4495.577 |  | 1.114 |
| 11(1) | 2(1)  | 4552.462 | 4379.292 |  | 0.010 |
| 11(1) | 3(1)  | 4153.957 | 3988.096 |  | 0.008 |
| 11(1) | 4(1)  | 4009.041 | 3861.758 |  | 0.015 |
| 11(1) | 5(1)  | 2625.294 | 2561.363 |  | 1.222 |
| 11(1) | 6(1)  | 2469.277 | 2401.760 |  | 0.021 |
| 11(1) | 7(1)  | 2391.616 | 2339.257 |  | 0.338 |
| 11(1) | 8(1)  | 2364.256 | 2311.707 |  | 0.134 |
| 11(1) | 9(1)  | 2309.959 | 2271.254 |  | 0.004 |
| 11(1) | 10(1) | 2009.615 | 1967.450 |  | 0.156 |
| 12(1) | 1(1)  | 4426.896 | 4266.721 |  | 0.019 |
| 12(1) | 2(1)  | 4297.212 | 4149.483 |  | 0.036 |
| 12(1) | 3(1)  | 3898.708 | 3752.915 |  | 0.003 |
| 12(1) | 4(1)  | 3753.791 | 3627.101 |  | 0.016 |
| 12(1) | 5(1)  | 2370.045 | 2333.095 |  | 0.177 |
| 12(1) | 6(1)  | 2214.027 | 2167.833 |  | 0.127 |
| 12(1) | 7(1)  | 2136.367 | 2103.267 |  | 0.167 |
| 12(1) | 8(1)  | 2109.006 | 2076.871 |  | 0.833 |
| 12(1) | 9(1)  | 2054.710 | 2040.394 |  | 0.241 |
| 12(1) | 10(1) | 1754.365 | 1732.972 |  | 1.273 |
| 12(1) | 11(1) | 1720.210 | 1703.600 |  | 2.367 |
| 13(1) | 1(1)  | 4121.705 | 3965.015 |  | 0.005 |
| 13(1) | 2(1)  | 3992.021 | 3847.561 |  | 0.278 |
| 13(1) | 3(1)  | 3593.517 | 3450.764 |  | 0.008 |
| 13(1) | 4(1)  | 3448.601 | 3325.497 |  | 0.010 |
| 13(1) | 5(1)  | 2064.854 | 2031.528 |  | 0.395 |
| 13(1) | 6(1)  | 1908.837 | 1867.658 |  | 0.030 |
| 13(1) | 7(1)  | 1831.176 | 1804.905 |  | 0.025 |
| 13(1) | 8(1)  | 1803.815 | 1775.016 |  | 0.046 |
| 13(1) | 9(1)  | 1749.519 | 1742.112 |  | 0.020 |
| 13(1) | 10(1) | 1449.174 | 1431.385 |  | 0.113 |

|       |       |          |          |  |        |
|-------|-------|----------|----------|--|--------|
| 13(1) | 11(1) | 1415.019 | 1402.929 |  | 0.045  |
| 13(1) | 12(1) | 1159.770 | 1168.185 |  | 0.022  |
| 14(1) | 1(1)  | 4072.619 | 3915.660 |  | 0.045  |
| 14(1) | 2(1)  | 3942.936 | 3797.990 |  | 0.053  |
| 14(1) | 3(1)  | 3544.432 | 3400.425 |  | 0.123  |
| 14(1) | 4(1)  | 3399.515 | 3274.657 |  | 0.068  |
| 14(1) | 5(1)  | 2015.769 | 1981.648 |  | 0.031  |
| 14(1) | 6(1)  | 1859.751 | 1817.420 |  | 0.011  |
| 14(1) | 7(1)  | 1782.091 | 1755.275 |  | 0.106  |
| 14(1) | 8(1)  | 1754.730 | 1726.857 |  | 0.039  |
| 14(1) | 9(1)  | 1700.433 | 1689.747 |  | 0.029  |
| 14(1) | 10(1) | 1400.089 | 1380.210 |  | 14.543 |
| 14(1) | 11(1) | 1365.934 | 1351.856 |  | 0.214  |
| 14(1) | 12(1) | 1110.684 | 1116.510 |  | 0.086  |
| 14(1) | 13(1) | 805.493  | 817.585  |  | 0.057  |
| 15(1) | 1(1)  | 6766.111 | 6464.045 |  | 0.000  |
| 15(1) | 2(1)  | 6636.428 | 6347.044 |  | 0.000  |
| 15(1) | 3(1)  | 6237.923 | 5945.572 |  | 0.102  |
| 15(1) | 4(1)  | 6093.007 | 5712.270 |  | 0.266  |
| 15(1) | 5(1)  | 4709.260 | 4530.787 |  | 0.002  |
| 15(1) | 6(1)  | 4553.243 | 4352.253 |  | 0.107  |
| 15(1) | 7(1)  | 4475.582 | 4297.225 |  | 0.161  |
| 15(1) | 8(1)  | 4448.221 | 4273.118 |  | 0.215  |
| 15(1) | 9(1)  | 4393.925 | 4240.324 |  | 0.102  |
| 15(1) | 10(1) | 4093.580 | 3928.636 |  | 0.022  |
| 15(1) | 11(1) | 4059.425 | 3902.321 |  | 0.023  |
| 15(1) | 12(1) | 3804.176 | 3667.722 |  | 0.000  |
| 15(1) | 13(1) | 3498.985 | 3365.914 |  | 0.001  |
| 15(1) | 14(1) | 3449.899 | 3315.116 |  | 0.017  |
| 16(1) | 1(1)  | 5182.459 | 4975.110 |  | 0.000  |
| 16(1) | 2(1)  | 5052.775 | 4858.120 |  | 0.001  |
| 16(1) | 3(1)  | 4654.271 | 4443.942 |  | 0.153  |
| 16(1) | 4(1)  | 4509.354 | 4320.356 |  | 0.227  |
| 16(1) | 5(1)  | 3125.608 | 3042.418 |  | 0.001  |
| 16(1) | 6(1)  | 2969.590 | 2870.094 |  | 0.275  |
| 16(1) | 7(1)  | 2891.930 | 2807.484 |  | 0.167  |
| 16(1) | 8(1)  | 2864.569 | 2787.045 |  | 0.006  |
| 16(1) | 9(1)  | 2810.273 | 2751.604 |  | 0.003  |
| 16(1) | 10(1) | 2509.928 | 2434.003 |  | 0.057  |
| 16(1) | 11(1) | 2475.773 | 2412.784 |  | 0.005  |
| 16(1) | 12(1) | 2220.523 | 2178.348 |  | 0.012  |
| 16(1) | 13(1) | 1915.333 | 1878.640 |  | 0.003  |
| 16(1) | 14(1) | 1866.247 | 1827.980 |  | 0.018  |
| 16(1) | 15(1) | 4559.739 | 4369.489 |  | 0.154  |
| 17(1) | 1(1)  | 4732.054 | 4542.814 |  | 0.000  |

|       |       |          |          |  |       |
|-------|-------|----------|----------|--|-------|
| 17(1) | 2(1)  | 4602.371 | 4425.723 |  | 0.003 |
| 17(1) | 3(1)  | 4203.866 | 4025.717 |  | 0.008 |
| 17(1) | 4(1)  | 4058.950 | 3895.734 |  | 0.152 |
| 17(1) | 5(1)  | 2675.203 | 2609.753 |  | 0.000 |
| 17(1) | 6(1)  | 2519.186 | 2438.450 |  | 0.015 |
| 17(1) | 7(1)  | 2441.525 | 2378.384 |  | 0.211 |
| 17(1) | 8(1)  | 2414.165 | 2353.912 |  | 0.045 |
| 17(1) | 9(1)  | 2359.868 | 2317.111 |  | 0.002 |
| 17(1) | 10(1) | 2059.524 | 2008.182 |  | 0.000 |
| 17(1) | 11(1) | 2025.368 | 1977.296 |  | 0.000 |
| 17(1) | 12(1) | 1770.119 | 1746.235 |  | 0.026 |
| 17(1) | 13(1) | 1464.928 | 1444.188 |  | 0.330 |
| 17(1) | 14(1) | 1415.843 | 1393.669 |  | 0.143 |
| 17(1) | 15(1) | 4109.334 | 3936.388 |  | 0.053 |
| 17(1) | 16(1) | 2525.682 | 2451.412 |  | 0.135 |
| 18(1) | 1(1)  | 4307.326 | 4132.558 |  | 0.442 |
| 18(1) | 2(1)  | 4177.643 | 4015.484 |  | 0.040 |
| 18(1) | 3(1)  | 3779.139 | 3619.763 |  | 0.000 |
| 18(1) | 4(1)  | 3634.222 | 3494.383 |  | 0.001 |
| 18(1) | 5(1)  | 2250.476 | 2204.511 |  | 0.019 |
| 18(1) | 6(1)  | 2094.458 | 2036.280 |  | 0.000 |
| 18(1) | 7(1)  | 2016.798 | 1974.772 |  | 0.002 |
| 18(1) | 8(1)  | 1989.437 | 1945.326 |  | 0.000 |
| 18(1) | 9(1)  | 1935.140 | 1924.744 |  | 0.114 |
| 18(1) | 10(1) | 1634.796 | 1599.940 |  | 0.001 |
| 18(1) | 11(1) | 1600.640 | 1568.640 |  | 0.119 |
| 18(1) | 12(1) | 1345.391 | 1338.187 |  | 0.000 |
| 18(1) | 13(1) | 1040.200 | 1037.173 |  | 0.042 |
| 18(1) | 14(1) | 991.115  | 986.555  |  | 0.001 |
| 18(1) | 15(1) | 3684.606 | 3534.411 |  | 0.032 |
| 18(1) | 16(1) | 2100.954 | 2046.448 |  | 0.015 |
| 18(1) | 17(1) | 1650.549 | 1614.328 |  | 8.250 |
| 19(1) | 1(1)  | 4212.472 | 4032.260 |  | 0.055 |
| 19(1) | 2(1)  | 4082.789 | 3914.670 |  | 0.025 |
| 19(1) | 3(1)  | 3684.285 | 3516.826 |  | 0.000 |
| 19(1) | 4(1)  | 3539.368 | 3392.720 |  | 0.005 |
| 19(1) | 5(1)  | 2155.621 | 2099.407 |  | 0.007 |
| 19(1) | 6(1)  | 1999.604 | 1930.896 |  | 0.001 |
| 19(1) | 7(1)  | 1921.944 | 1871.320 |  | 0.077 |
| 19(1) | 8(1)  | 1894.583 | 1843.131 |  | 0.004 |
| 19(1) | 9(1)  | 1840.286 | 1808.053 |  | 0.020 |
| 19(1) | 10(1) | 1539.942 | 1496.820 |  | 0.641 |
| 19(1) | 11(1) | 1505.786 | 1470.374 |  | 0.287 |
| 19(1) | 12(1) | 1250.537 | 1235.701 |  | 0.001 |
| 19(1) | 13(1) | 945.346  | 934.954  |  | 0.007 |

|       |       |          |          |  |       |
|-------|-------|----------|----------|--|-------|
| 19(1) | 14(1) | 896.261  | 883.910  |  | 0.001 |
| 19(1) | 15(1) | 3589.752 | 3433.367 |  | 0.111 |
| 19(1) | 16(1) | 2006.100 | 1939.183 |  | 0.060 |
| 19(1) | 17(1) | 1555.695 | 1514.415 |  | 0.861 |
| 19(1) | 18(1) | 1130.968 | 1102.068 |  | 0.989 |
| 20(1) | 1(1)  | 4031.693 | 3825.554 |  | 0.003 |
| 20(1) | 2(1)  | 3902.009 | 3719.570 |  | 0.443 |
| 20(1) | 3(1)  | 3503.505 | 3342.690 |  | 0.001 |
| 20(1) | 4(1)  | 3358.589 | 3217.881 |  | 0.016 |
| 20(1) | 5(1)  | 1974.842 | 1932.593 |  | 1.101 |
| 20(1) | 6(1)  | 1818.824 | 1758.361 |  | 0.018 |
| 20(1) | 7(1)  | 1741.164 | 1695.861 |  | 0.009 |
| 20(1) | 8(1)  | 1713.803 | 1660.253 |  | 0.077 |
| 20(1) | 9(1)  | 1659.507 | 1644.720 |  | 0.005 |
| 20(1) | 10(1) | 1359.162 | 1323.918 |  | 0.018 |
| 20(1) | 11(1) | 1325.007 | 1310.913 |  | 0.006 |
| 20(1) | 12(1) | 1069.757 | 1060.293 |  | 0.031 |
| 20(1) | 13(1) | 764.567  | 755.084  |  | 0.001 |
| 20(1) | 14(1) | 715.481  | 702.128  |  | 0.018 |
| 20(1) | 15(1) | 3408.973 | 3257.519 |  | 0.023 |
| 20(1) | 16(1) | 1825.320 | 1767.892 |  | 0.065 |
| 20(1) | 17(1) | 1374.916 | 1330.238 |  | 0.006 |
| 20(1) | 18(1) | 950.188  | 895.337  |  | 8.923 |
| 20(1) | 19(1) | 855.334  | 813.700  |  | 1.541 |
| 21(1) | 1(1)  | 3726.222 | 3671.667 |  | 0.026 |
| 21(1) | 2(1)  | 3596.539 | 3545.102 |  | 0.006 |
| 21(1) | 3(1)  | 3198.035 | 3111.772 |  | 0.000 |
| 21(1) | 4(1)  | 3053.118 | 3008.355 |  | 0.065 |
| 21(1) | 5(1)  | 1669.371 | 1716.102 |  | 0.083 |
| 21(1) | 6(1)  | 1513.354 | 1531.105 |  | 4.335 |
| 21(1) | 7(1)  | 1435.694 | 1501.315 |  | 0.353 |
| 21(1) | 8(1)  | 1408.333 | 1467.028 |  | 0.001 |
| 21(1) | 9(1)  | 1354.036 | 1431.589 |  | 0.222 |
| 21(1) | 10(1) | 1053.692 | 1115.974 |  | 0.022 |
| 21(1) | 11(1) | 1019.536 | 1087.103 |  | 0.114 |
| 21(1) | 12(1) | 764.287  | 871.098  |  | 0.020 |
| 21(1) | 13(1) | 459.096  | 564.176  |  | 0.024 |
| 21(1) | 14(1) | 410.011  | 510.246  |  | 0.000 |
| 21(1) | 15(1) | 3103.502 | 3054.861 |  | 8.026 |
| 21(1) | 16(1) | 1519.850 | 1558.261 |  | 2.801 |
| 21(1) | 17(1) | 1069.445 | 1123.932 |  | 1.668 |
| 21(1) | 18(1) | 644.718  | 746.837  |  | 0.118 |
| 21(1) | 19(1) | 549.864  | 598.342  |  | 0.132 |
| 21(1) | 20(1) | 369.084  | 367.334  |  | 0.203 |

**Table S3.** Unscaled harmonic ( $E_{\text{harm}}$ , in  $\text{cm}^{-1}$ ) and anharmonic ( $E_{\text{anharm}}$ , in  $\text{cm}^{-1}$ ) frequencies and absolute harmonic ( $I_{\text{harm}}$ , in  $\text{km mol}^{-1}$ ) and anharmonic ( $I_{\text{anharm}}$ , in  $\text{km mol}^{-1}$ ) IR intensities of the **aC** isomer of thioacetamide as computed at the B3LYP/6-311++G(3df,3pd) level of theory.

| Fundamental Bands |                   |                     |                   |                     |
|-------------------|-------------------|---------------------|-------------------|---------------------|
| Mode (Quanta)     | $E_{\text{harm}}$ | $E_{\text{anharm}}$ | $I_{\text{harm}}$ | $I_{\text{anharm}}$ |
| 1(1)              | 3455.068          | 3275.813            | 1.600             | 1.766               |
| 2(1)              | 3118.941          | 2978.127            | 11.769            | 12.468              |
| 3(1)              | 3035.015          | 2934.502            | 5.506             | 6.811               |
| 4(1)              | 2686.155          | 2562.644            | 1.370             | 0.392               |
| 5(1)              | 1680.886          | 1639.983            | 149.379           | 133.907             |
| 6(1)              | 1482.424          | 1439.240            | 22.693            | 19.241              |
| 7(1)              | 1406.182          | 1372.197            | 14.062            | 12.498              |
| 8(1)              | 1299.347          | 1252.891            | 69.282            | 55.360              |
| 9(1)              | 1070.337          | 1040.666            | 52.219            | 32.872              |
| 10(1)             | 996.465           | 969.477             | 53.511            | 52.971              |
| 11(1)             | 851.843           | 826.488             | 13.761            | 14.694              |
| 12(1)             | 636.633           | 621.233             | 49.157            | 49.960              |
| 13(1)             | 449.857           | 446.087             | 6.907             | 5.070               |
| 14(1)             | 325.300           | 323.712             | 4.344             | 4.355               |
| 15(1)             | 3095.049          | 2955.548            | 4.160             | 5.240               |
| 16(1)             | 1472.775          | 1429.048            | 11.582            | 8.562               |
| 17(1)             | 1063.927          | 1037.282            | 5.184             | 4.952               |
| 18(1)             | 828.737           | 807.255             | 53.977            | 51.706              |
| 19(1)             | 501.375           | 497.483             | 0.075             | 0.111               |
| 20(1)             | 339.808           | 348.833             | 18.091            | 17.956              |
| 21(1)             | 97.849            | 103.946             | 0.468             | 0.166               |
| Overtones         |                   |                     |                   |                     |
| Mode (Quanta)     | $E_{\text{harm}}$ | $E_{\text{anharm}}$ | $I_{\text{harm}}$ | $I_{\text{anharm}}$ |
| 1(2)              | 6910.136          | 6384.375            |                   | 4.835               |
| 2(2)              | 6237.881          | 5881.345            |                   | 0.487               |
| 3(2)              | 6070.030          | 5781.910            |                   | 0.064               |
| 4(2)              | 5372.309          | 5018.358            |                   | 0.312               |
| 5(2)              | 3361.772          | 3268.699            |                   | 2.524               |
| 6(2)              | 2964.849          | 2873.263            |                   | 0.029               |
| 7(2)              | 2812.365          | 2725.279            |                   | 0.045               |
| 8(2)              | 2598.694          | 2501.560            |                   | 0.087               |
| 9(2)              | 2140.674          | 2078.101            |                   | 0.005               |
| 10(2)             | 1992.930          | 1945.234            |                   | 0.049               |
| 11(2)             | 1703.686          | 1676.165            |                   | 0.448               |
| 12(2)             | 1273.265          | 1238.130            |                   | 2.701               |
| 13(2)             | 899.714           | 892.411             |                   | 0.015               |
| 14(2)             | 650.600           | 648.107             |                   | 0.045               |

|                   |      |                   |                     |                   |                     |
|-------------------|------|-------------------|---------------------|-------------------|---------------------|
| 15(2)             |      | 6190.097          | 5848.071            |                   | 0.469               |
| 16(2)             |      | 2945.549          | 2831.485            |                   | 0.128               |
| 17(2)             |      | 2127.855          | 2071.533            |                   | 0.097               |
| 18(2)             |      | 1657.474          | 1607.438            |                   | 6.539               |
| 19(2)             |      | 1002.750          | 1000.443            |                   | 0.393               |
| 20(2)             |      | 679.615           | 710.741             |                   | 1.081               |
| 21(2)             |      | 195.697           | 207.069             |                   | 0.030               |
| Combination Bands |      |                   |                     |                   |                     |
| Mode<br>(Quanta)  |      | $E_{\text{harm}}$ | $E_{\text{anharm}}$ | $I_{\text{harm}}$ | $I_{\text{anharm}}$ |
| 2(1)              | 1(1) | 6574.009          | 6254.405            |                   | 0.014               |
| 3(1)              | 1(1) | 6490.083          | 6184.504            |                   | 0.005               |
| 3(1)              | 2(1) | 6153.956          | 5826.128            |                   | 0.107               |
| 4(1)              | 1(1) | 6141.223          | 5838.315            |                   | 0.005               |
| 4(1)              | 2(1) | 5805.095          | 5540.670            |                   | 0.002               |
| 4(1)              | 3(1) | 5721.170          | 5471.399            |                   | 0.000               |
| 5(1)              | 1(1) | 5135.954          | 4918.823            |                   | 0.121               |
| 5(1)              | 2(1) | 4799.827          | 4623.665            |                   | 0.093               |
| 5(1)              | 3(1) | 4715.901          | 4551.235            |                   | 0.083               |
| 5(1)              | 4(1) | 4367.041          | 4206.791            |                   | 0.091               |
| 6(1)              | 1(1) | 4937.492          | 4716.195            |                   | 0.094               |
| 6(1)              | 2(1) | 4601.365          | 4407.470            |                   | 0.265               |
| 6(1)              | 3(1) | 4517.440          | 4329.490            |                   | 0.081               |
| 6(1)              | 4(1) | 4168.579          | 4003.147            |                   | 0.003               |
| 6(1)              | 5(1) | 3163.311          | 3083.409            |                   | 0.589               |
| 7(1)              | 1(1) | 4861.250          | 4648.107            |                   | 0.009               |
| 7(1)              | 2(1) | 4525.123          | 4346.867            |                   | 0.150               |
| 7(1)              | 3(1) | 4441.198          | 4293.117            |                   | 0.169               |
| 7(1)              | 4(1) | 4092.337          | 3934.673            |                   | 0.003               |
| 7(1)              | 5(1) | 3087.068          | 3013.143            |                   | 0.911               |
| 7(1)              | 6(1) | 2888.607          | 2807.916            |                   | 0.234               |
| 8(1)              | 1(1) | 4754.415          | 4529.838            |                   | 1.235               |
| 8(1)              | 2(1) | 4418.288          | 4235.037            |                   | 0.085               |
| 8(1)              | 3(1) | 4334.362          | 4166.850            |                   | 0.194               |
| 8(1)              | 4(1) | 3985.502          | 3820.960            |                   | 0.031               |
| 8(1)              | 5(1) | 2980.233          | 2899.249            |                   | 0.692               |
| 8(1)              | 6(1) | 2781.772          | 2697.210            |                   | 0.116               |
| 8(1)              | 7(1) | 2705.530          | 2629.118            |                   | 0.053               |
| 9(1)              | 1(1) | 4525.405          | 4316.194            |                   | 0.002               |
| 9(1)              | 2(1) | 4189.278          | 4013.258            |                   | 0.177               |
| 9(1)              | 3(1) | 4105.352          | 3947.376            |                   | 0.162               |
| 9(1)              | 4(1) | 3756.492          | 3603.197            |                   | 0.017               |
| 9(1)              | 5(1) | 2751.223          | 2682.047            |                   | 0.091               |
| 9(1)              | 6(1) | 2552.762          | 2476.087            |                   | 0.080               |
| 9(1)              | 7(1) | 2476.520          | 2409.559            |                   | 0.068               |

|       |       |          |          |  |        |
|-------|-------|----------|----------|--|--------|
| 9(1)  | 8(1)  | 2369.684 | 2286.505 |  | 0.231  |
| 10(1) | 1(1)  | 4451.533 | 4250.202 |  | 0.107  |
| 10(1) | 2(1)  | 4115.406 | 3953.033 |  | 0.051  |
| 10(1) | 3(1)  | 4031.480 | 3882.405 |  | 0.045  |
| 10(1) | 4(1)  | 3682.620 | 3528.506 |  | 0.443  |
| 10(1) | 5(1)  | 2677.351 | 2612.883 |  | 1.716  |
| 10(1) | 6(1)  | 2478.890 | 2413.525 |  | 0.048  |
| 10(1) | 7(1)  | 2402.648 | 2343.962 |  | 0.344  |
| 10(1) | 8(1)  | 2295.812 | 2227.581 |  | 0.303  |
| 10(1) | 9(1)  | 2066.802 | 2011.382 |  | 0.049  |
| 11(1) | 1(1)  | 4306.911 | 4113.392 |  | 0.002  |
| 11(1) | 2(1)  | 3970.783 | 3815.432 |  | 0.036  |
| 11(1) | 3(1)  | 3886.858 | 3745.473 |  | 0.012  |
| 11(1) | 4(1)  | 3537.998 | 3386.146 |  | 0.480  |
| 11(1) | 5(1)  | 2532.729 | 2478.210 |  | 0.109  |
| 11(1) | 6(1)  | 2334.267 | 2276.465 |  | 0.023  |
| 11(1) | 7(1)  | 2258.025 | 2206.469 |  | 0.296  |
| 11(1) | 8(1)  | 2151.190 | 2092.045 |  | 0.170  |
| 11(1) | 9(1)  | 1922.180 | 1875.237 |  | 0.178  |
| 11(1) | 10(1) | 1848.308 | 1808.104 |  | 1.455  |
| 12(1) | 1(1)  | 4091.700 | 3897.333 |  | 0.001  |
| 12(1) | 2(1)  | 3755.573 | 3599.226 |  | 0.052  |
| 12(1) | 3(1)  | 3671.648 | 3530.097 |  | 0.029  |
| 12(1) | 4(1)  | 3322.787 | 3184.031 |  | 0.018  |
| 12(1) | 5(1)  | 2317.519 | 2265.139 |  | 0.060  |
| 12(1) | 6(1)  | 2119.057 | 2061.248 |  | 0.030  |
| 12(1) | 7(1)  | 2042.815 | 1992.452 |  | 0.102  |
| 12(1) | 8(1)  | 1935.980 | 1879.188 |  | 0.044  |
| 12(1) | 9(1)  | 1706.970 | 1658.323 |  | 8.395  |
| 12(1) | 10(1) | 1633.098 | 1592.078 |  | 0.337  |
| 12(1) | 11(1) | 1488.475 | 1456.977 |  | 0.450  |
| 13(1) | 1(1)  | 3904.925 | 3721.894 |  | 0.120  |
| 13(1) | 2(1)  | 3568.797 | 3424.400 |  | 0.025  |
| 13(1) | 3(1)  | 3484.872 | 3354.769 |  | 0.012  |
| 13(1) | 4(1)  | 3136.012 | 3008.662 |  | 0.042  |
| 13(1) | 5(1)  | 2130.743 | 2086.479 |  | 0.041  |
| 13(1) | 6(1)  | 1932.281 | 1886.759 |  | 0.017  |
| 13(1) | 7(1)  | 1856.039 | 1818.308 |  | 0.021  |
| 13(1) | 8(1)  | 1749.204 | 1704.627 |  | 0.809  |
| 13(1) | 9(1)  | 1520.194 | 1483.637 |  | 0.130  |
| 13(1) | 10(1) | 1446.322 | 1418.553 |  | 0.378  |
| 13(1) | 11(1) | 1301.700 | 1282.891 |  | 18.103 |
| 13(1) | 12(1) | 1086.489 | 1068.484 |  | 14.003 |
| 14(1) | 1(1)  | 3780.368 | 3599.428 |  | 0.047  |
| 14(1) | 2(1)  | 3444.240 | 3301.765 |  | 0.122  |

|       |       |          |          |  |       |
|-------|-------|----------|----------|--|-------|
| 14(1) | 3(1)  | 3360.315 | 3232.577 |  | 0.015 |
| 14(1) | 4(1)  | 3011.454 | 2885.400 |  | 0.086 |
| 14(1) | 5(1)  | 2006.186 | 1967.216 |  | 0.143 |
| 14(1) | 6(1)  | 1807.724 | 1764.694 |  | 0.057 |
| 14(1) | 7(1)  | 1731.482 | 1695.794 |  | 0.012 |
| 14(1) | 8(1)  | 1624.647 | 1581.560 |  | 0.240 |
| 14(1) | 9(1)  | 1395.637 | 1363.577 |  | 0.330 |
| 14(1) | 10(1) | 1321.765 | 1297.174 |  | 0.214 |
| 14(1) | 11(1) | 1177.143 | 1160.392 |  | 0.093 |
| 14(1) | 12(1) | 961.932  | 943.209  |  | 0.434 |
| 14(1) | 13(1) | 775.157  | 770.783  |  | 0.280 |
| 15(1) | 1(1)  | 6550.116 | 6231.332 |  | 0.002 |
| 15(1) | 2(1)  | 6213.989 | 5906.485 |  | 0.222 |
| 15(1) | 3(1)  | 6130.064 | 5777.513 |  | 0.152 |
| 15(1) | 4(1)  | 5781.203 | 5518.332 |  | 0.000 |
| 15(1) | 5(1)  | 4775.935 | 4597.793 |  | 0.008 |
| 15(1) | 6(1)  | 4577.473 | 4381.199 |  | 0.079 |
| 15(1) | 7(1)  | 4501.231 | 4318.314 |  | 0.283 |
| 15(1) | 8(1)  | 4394.396 | 4214.525 |  | 0.191 |
| 15(1) | 9(1)  | 4165.386 | 3995.032 |  | 0.045 |
| 15(1) | 10(1) | 4091.514 | 3929.164 |  | 0.023 |
| 15(1) | 11(1) | 3946.891 | 3792.699 |  | 0.005 |
| 15(1) | 12(1) | 3731.681 | 3577.210 |  | 0.017 |
| 15(1) | 13(1) | 3544.905 | 3401.636 |  | 0.009 |
| 15(1) | 14(1) | 3420.348 | 3279.540 |  | 0.013 |
| 16(1) | 1(1)  | 4927.843 | 4704.686 |  | 0.001 |
| 16(1) | 2(1)  | 4591.715 | 4388.828 |  | 0.127 |
| 16(1) | 3(1)  | 4507.790 | 4319.070 |  | 0.183 |
| 16(1) | 4(1)  | 4158.929 | 3991.725 |  | 0.001 |
| 16(1) | 5(1)  | 3153.661 | 3072.607 |  | 0.003 |
| 16(1) | 6(1)  | 2955.199 | 2862.781 |  | 0.064 |
| 16(1) | 7(1)  | 2878.957 | 2794.772 |  | 0.100 |
| 16(1) | 8(1)  | 2772.122 | 2686.852 |  | 0.000 |
| 16(1) | 9(1)  | 2543.112 | 2465.193 |  | 0.050 |
| 16(1) | 10(1) | 2469.240 | 2400.382 |  | 0.026 |
| 16(1) | 11(1) | 2324.617 | 2265.231 |  | 0.025 |
| 16(1) | 12(1) | 2109.407 | 2049.910 |  | 0.009 |
| 16(1) | 13(1) | 1922.631 | 1874.703 |  | 0.005 |
| 16(1) | 14(1) | 1798.074 | 1753.757 |  | 0.014 |
| 16(1) | 15(1) | 4567.823 | 4376.519 |  | 0.157 |
| 17(1) | 1(1)  | 4518.995 | 4311.019 |  | 0.000 |
| 17(1) | 2(1)  | 4182.868 | 4011.696 |  | 0.019 |
| 17(1) | 3(1)  | 4098.943 | 3940.880 |  | 0.198 |
| 17(1) | 4(1)  | 3750.082 | 3599.874 |  | 0.000 |
| 17(1) | 5(1)  | 2744.814 | 2677.821 |  | 0.012 |



|       |       |          |          |  |       |
|-------|-------|----------|----------|--|-------|
| 17(1) | 6(1)  | 2546.352 | 2471.929 |  | 0.017 |
| 17(1) | 7(1)  | 2470.110 | 2404.248 |  | 0.248 |
| 17(1) | 8(1)  | 2363.275 | 2294.241 |  | 0.032 |
| 17(1) | 9(1)  | 2134.265 | 2077.293 |  | 0.000 |
| 17(1) | 10(1) | 2060.393 | 2010.056 |  | 0.000 |
| 17(1) | 11(1) | 1915.770 | 1872.747 |  | 0.013 |
| 17(1) | 12(1) | 1700.560 | 1658.542 |  | 0.001 |
| 17(1) | 13(1) | 1513.784 | 1483.630 |  | 0.083 |
| 17(1) | 14(1) | 1389.227 | 1360.269 |  | 0.097 |
| 17(1) | 15(1) | 4158.976 | 3986.703 |  | 0.056 |
| 17(1) | 16(1) | 2536.702 | 2461.612 |  | 0.116 |
| 18(1) | 1(1)  | 4283.805 | 4068.377 |  | 0.006 |
| 18(1) | 2(1)  | 3947.677 | 3785.402 |  | 0.001 |
| 18(1) | 3(1)  | 3863.752 | 3715.168 |  | 0.000 |
| 18(1) | 4(1)  | 3514.892 | 3369.768 |  | 0.001 |
| 18(1) | 5(1)  | 2509.623 | 2446.616 |  | 0.000 |
| 18(1) | 6(1)  | 2311.161 | 2246.835 |  | 0.011 |
| 18(1) | 7(1)  | 2234.919 | 2178.507 |  | 0.034 |
| 18(1) | 8(1)  | 2128.084 | 2063.558 |  | 0.141 |
| 18(1) | 9(1)  | 1899.074 | 1848.325 |  | 0.048 |
| 18(1) | 10(1) | 1825.202 | 1781.667 |  | 0.020 |
| 18(1) | 11(1) | 1680.580 | 1643.155 |  | 0.013 |
| 18(1) | 12(1) | 1465.369 | 1427.478 |  | 0.156 |
| 18(1) | 13(1) | 1278.594 | 1252.793 |  | 0.027 |
| 18(1) | 14(1) | 1154.037 | 1131.058 |  | 0.002 |
| 18(1) | 15(1) | 3923.785 | 3761.606 |  | 0.072 |
| 18(1) | 16(1) | 2301.512 | 2235.925 |  | 0.023 |
| 18(1) | 17(1) | 1892.664 | 1841.917 |  | 0.153 |
| 19(1) | 1(1)  | 3956.443 | 3772.112 |  | 0.001 |
| 19(1) | 2(1)  | 3620.315 | 3474.919 |  | 0.013 |
| 19(1) | 3(1)  | 3536.390 | 3405.854 |  | 0.003 |
| 19(1) | 4(1)  | 3187.530 | 3060.258 |  | 0.000 |
| 19(1) | 5(1)  | 2182.261 | 2138.446 |  | 0.037 |
| 19(1) | 6(1)  | 1983.799 | 1935.286 |  | 0.003 |
| 19(1) | 7(1)  | 1907.557 | 1869.578 |  | 0.071 |
| 19(1) | 8(1)  | 1800.722 | 1754.636 |  | 0.011 |
| 19(1) | 9(1)  | 1571.712 | 1539.688 |  | 0.193 |
| 19(1) | 10(1) | 1497.840 | 1473.416 |  | 0.899 |
| 19(1) | 11(1) | 1353.218 | 1333.511 |  | 0.024 |
| 19(1) | 12(1) | 1138.007 | 1117.597 |  | 0.005 |
| 19(1) | 13(1) | 951.232  | 943.959  |  | 0.008 |
| 19(1) | 14(1) | 826.675  | 821.644  |  | 0.002 |
| 19(1) | 15(1) | 3596.423 | 3452.947 |  | 0.201 |
| 19(1) | 16(1) | 1974.150 | 1923.120 |  | 0.020 |
| 19(1) | 17(1) | 1565.302 | 1536.939 |  | 0.032 |

|       |       |          |          |  |       |
|-------|-------|----------|----------|--|-------|
| 19(1) | 18(1) | 1330.112 | 1311.664 |  | 0.078 |
| 20(1) | 1(1)  | 3794.876 | 3622.909 |  | 0.000 |
| 20(1) | 2(1)  | 3458.748 | 3326.088 |  | 0.006 |
| 20(1) | 3(1)  | 3374.823 | 3257.290 |  | 0.004 |
| 20(1) | 4(1)  | 3025.962 | 2904.000 |  | 0.054 |
| 20(1) | 5(1)  | 2020.694 | 1993.652 |  | 0.018 |
| 20(1) | 6(1)  | 1822.232 | 1789.136 |  | 0.001 |
| 20(1) | 7(1)  | 1745.990 | 1720.946 |  | 0.002 |
| 20(1) | 8(1)  | 1639.155 | 1606.911 |  | 0.000 |
| 20(1) | 9(1)  | 1410.145 | 1388.666 |  | 0.017 |
| 20(1) | 10(1) | 1336.273 | 1324.534 |  | 0.068 |
| 20(1) | 11(1) | 1191.651 | 1187.330 |  | 0.106 |
| 20(1) | 12(1) | 976.440  | 963.189  |  | 0.002 |
| 20(1) | 13(1) | 789.665  | 794.370  |  | 0.261 |
| 20(1) | 14(1) | 665.107  | 672.314  |  | 0.022 |
| 20(1) | 15(1) | 3434.856 | 3304.423 |  | 0.001 |
| 20(1) | 16(1) | 1812.582 | 1777.333 |  | 0.009 |
| 20(1) | 17(1) | 1403.735 | 1386.035 |  | 0.552 |
| 20(1) | 18(1) | 1168.545 | 1158.396 |  | 0.185 |
| 20(1) | 19(1) | 841.183  | 853.879  |  | 0.303 |
| 21(1) | 1(1)  | 3552.917 | 3380.510 |  | 0.000 |
| 21(1) | 2(1)  | 3216.789 | 3080.957 |  | 0.237 |
| 21(1) | 3(1)  | 3132.864 | 3015.339 |  | 0.102 |
| 21(1) | 4(1)  | 2784.003 | 2664.344 |  | 0.005 |
| 21(1) | 5(1)  | 1778.735 | 1747.768 |  | 0.002 |
| 21(1) | 6(1)  | 1580.273 | 1544.432 |  | 0.733 |
| 21(1) | 7(1)  | 1504.031 | 1479.288 |  | 0.509 |
| 21(1) | 8(1)  | 1397.196 | 1362.455 |  | 0.012 |
| 21(1) | 9(1)  | 1168.186 | 1142.318 |  | 0.000 |
| 21(1) | 10(1) | 1094.314 | 1079.280 |  | 0.127 |
| 21(1) | 11(1) | 949.691  | 947.731  |  | 0.038 |
| 21(1) | 12(1) | 734.481  | 723.968  |  | 0.127 |
| 21(1) | 13(1) | 547.706  | 549.427  |  | 0.024 |
| 21(1) | 14(1) | 423.148  | 426.970  |  | 0.089 |
| 21(1) | 15(1) | 3192.897 | 3062.610 |  | 0.771 |
| 21(1) | 16(1) | 1570.623 | 1532.704 |  | 0.760 |
| 21(1) | 17(1) | 1161.776 | 1136.811 |  | 0.036 |
| 21(1) | 18(1) | 926.586  | 909.916  |  | 0.149 |
| 21(1) | 19(1) | 599.224  | 603.222  |  | 0.130 |
| 21(1) | 20(1) | 437.656  | 461.903  |  | 0.165 |

**Table S4.** Unscaled harmonic ( $E_{\text{harm}}$ , in  $\text{cm}^{-1}$ ) and anharmonic ( $E_{\text{anharm}}$ , in  $\text{cm}^{-1}$ ) frequencies and absolute harmonic ( $I_{\text{harm}}$ , in  $\text{km mol}^{-1}$ ) and anharmonic ( $I_{\text{anharm}}$ , in  $\text{km mol}^{-1}$ ) IR intensities of the **aT** isomer of thioacetamide as computed at the B3LYP/6-311++G(3df,3pd) level of theory.

| Fundamental Bands |                   |                     |                   |                     |
|-------------------|-------------------|---------------------|-------------------|---------------------|
| Mode (Quanta)     | $E_{\text{harm}}$ | $E_{\text{anharm}}$ | $I_{\text{harm}}$ | $I_{\text{anharm}}$ |
| 1(1)              | 3469.687          | 3290.781            | 2.815             | 2.063               |
| 2(1)              | 3112.067          | 2971.486            | 14.532            | 15.406              |
| 3(1)              | 3032.604          | 2932.917            | 6.878             | 8.399               |
| 4(1)              | 2687.783          | 2563.948            | 1.191             | 2.066               |
| 5(1)              | 1682.463          | 1641.880            | 165.996           | 138.737             |
| 6(1)              | 1482.867          | 1440.343            | 17.698            | 15.000              |
| 7(1)              | 1403.497          | 1370.036            | 12.099            | 10.784              |
| 8(1)              | 1300.045          | 1254.228            | 61.041            | 63.799              |
| 9(1)              | 1065.693          | 1036.969            | 65.215            | 55.302              |
| 10(1)             | 1011.458          | 981.263             | 50.293            | 51.430              |
| 11(1)             | 896.739           | 871.941             | 12.720            | 12.594              |
| 12(1)             | 638.007           | 624.218             | 48.304            | 48.551              |
| 13(1)             | 433.679           | 429.636             | 3.069             | 1.741               |
| 14(1)             | 340.089           | 343.964             | 0.712             | 0.841               |
| 15(1)             | 3095.908          | 2956.097            | 4.687             | 6.031               |
| 16(1)             | 1475.226          | 1432.822            | 11.498            | 9.173               |
| 17(1)             | 1064.877          | 1040.296            | 5.285             | 3.763               |
| 18(1)             | 831.920           | 811.525             | 58.239            | 53.297              |
| 19(1)             | 506.892           | 501.774             | 0.994             | 0.764               |
| 20(1)             | 245.068           | 161.718             | 4.993             | 4.704               |
| 21(1)             | 164.289           | 151.412             | 0.098             | 0.211               |
| Overtones         |                   |                     |                   |                     |
| Mode (Quanta)     | $E_{\text{harm}}$ | $E_{\text{anharm}}$ | $I_{\text{harm}}$ | $I_{\text{anharm}}$ |
| 1(2)              | 6939.374          | 6416.591            |                   | 4.604               |
| 2(2)              | 6224.133          | 5872.684            |                   | 0.516               |
| 3(2)              | 6065.207          | 5776.617            |                   | 0.066               |
| 4(2)              | 5375.566          | 5021.709            |                   | 0.229               |
| 5(2)              | 3364.925          | 3264.758            |                   | 2.671               |
| 6(2)              | 2965.734          | 2876.113            |                   | 0.036               |
| 7(2)              | 2806.993          | 2721.137            |                   | 0.062               |
| 8(2)              | 2600.090          | 2503.416            |                   | 0.146               |
| 9(2)              | 2131.385          | 2076.736            |                   | 0.004               |
| 10(2)             | 2022.917          | 1968.572            |                   | 0.005               |
| 11(2)             | 1793.477          | 1743.381            |                   | 4.176               |
| 12(2)             | 1276.014          | 1244.373            |                   | 2.465               |
| 13(2)             | 867.358           | 859.115             |                   | 0.015               |
| 14(2)             | 680.177           | 682.884             |                   | 0.030               |

|                   |                   |                     |                   |                     |
|-------------------|-------------------|---------------------|-------------------|---------------------|
| 15(2)             | 6191.816          | 5848.925            |                   | 0.465               |
| 16(2)             | 2950.451          | 2834.425            |                   | 0.166               |
| 17(2)             | 2129.755          | 2077.456            |                   | 0.116               |
| 18(2)             | 1663.839          | 1616.204            |                   | 7.827               |
| 19(2)             | 1013.783          | 1008.836            |                   | 0.855               |
| 20(2)             | 490.136           | 262.464             |                   | 1.132               |
| 21(2)             | 328.578           | 285.739             |                   | 0.021               |
| Combination Bands |                   |                     |                   |                     |
| Mode<br>(Quanta)  | $E_{\text{harm}}$ | $E_{\text{anharm}}$ | $I_{\text{harm}}$ | $I_{\text{anharm}}$ |
| 2(1) 1(1)         | 6581.754          | 6262.575            |                   | 0.010               |
| 3(1) 1(1)         | 6502.290          | 6196.384            |                   | 0.004               |
| 3(1) 2(1)         | 6144.670          | 5809.852            |                   | 0.132               |
| 4(1) 1(1)         | 6157.470          | 5854.822            |                   | 0.002               |
| 4(1) 2(1)         | 5799.850          | 5535.410            |                   | 0.009               |
| 4(1) 3(1)         | 5720.387          | 5469.874            |                   | 0.007               |
| 5(1) 1(1)         | 5152.149          | 4931.501            |                   | 0.119               |
| 5(1) 2(1)         | 4794.529          | 4615.289            |                   | 0.094               |
| 5(1) 3(1)         | 4715.066          | 4546.161            |                   | 0.110               |
| 5(1) 4(1)         | 4370.246          | 4204.672            |                   | 0.027               |
| 6(1) 1(1)         | 4952.554          | 4731.072            |                   | 0.105               |
| 6(1) 2(1)         | 4594.934          | 4400.906            |                   | 0.254               |
| 6(1) 3(1)         | 4515.471          | 4326.595            |                   | 0.100               |
| 6(1) 4(1)         | 4170.650          | 4004.249            |                   | 0.028               |
| 6(1) 5(1)         | 3165.330          | 3081.150            |                   | 0.477               |
| 7(1) 1(1)         | 4873.183          | 4660.892            |                   | 0.014               |
| 7(1) 2(1)         | 4515.563          | 4338.059            |                   | 0.148               |
| 7(1) 3(1)         | 4436.100          | 4287.826            |                   | 0.201               |
| 7(1) 4(1)         | 4091.280          | 3933.957            |                   | 0.000               |
| 7(1) 5(1)         | 3085.959          | 3008.772            |                   | 1.357               |
| 7(1) 6(1)         | 2886.364          | 2805.525            |                   | 0.240               |
| 8(1) 1(1)         | 4769.732          | 4546.108            |                   | 1.399               |
| 8(1) 2(1)         | 4412.112          | 4229.448            |                   | 0.100               |
| 8(1) 3(1)         | 4332.649          | 4164.636            |                   | 0.184               |
| 8(1) 4(1)         | 3987.828          | 3823.175            |                   | 0.035               |
| 8(1) 5(1)         | 2982.508          | 2898.147            |                   | 0.666               |
| 8(1) 6(1)         | 2782.912          | 2697.896            |                   | 0.112               |
| 8(1) 7(1)         | 2703.542          | 2627.731            |                   | 0.039               |
| 9(1) 1(1)         | 4535.380          | 4330.916            |                   | 0.003               |
| 9(1) 2(1)         | 4177.759          | 4006.606            |                   | 0.143               |
| 9(1) 3(1)         | 4098.296          | 3943.679            |                   | 0.182               |
| 9(1) 4(1)         | 3753.476          | 3603.905            |                   | 0.013               |
| 9(1) 5(1)         | 2748.155          | 2679.668            |                   | 0.150               |
| 9(1) 6(1)         | 2548.560          | 2475.094            |                   | 0.060               |
| 9(1) 7(1)         | 2469.189          | 2406.655            |                   | 0.053               |

|       |       |          |          |  |       |
|-------|-------|----------|----------|--|-------|
| 9(1)  | 8(1)  | 2365.738 | 2285.721 |  | 0.345 |
| 10(1) | 1(1)  | 4481.145 | 4275.713 |  | 0.118 |
| 10(1) | 2(1)  | 4123.525 | 3957.539 |  | 0.020 |
| 10(1) | 3(1)  | 4044.062 | 3890.878 |  | 0.056 |
| 10(1) | 4(1)  | 3699.241 | 3542.067 |  | 0.318 |
| 10(1) | 5(1)  | 2693.921 | 2624.580 |  | 0.554 |
| 10(1) | 6(1)  | 2494.325 | 2425.367 |  | 0.020 |
| 10(1) | 7(1)  | 2414.955 | 2354.283 |  | 0.204 |
| 10(1) | 8(1)  | 2311.503 | 2241.048 |  | 0.291 |
| 10(1) | 9(1)  | 2077.151 | 2023.510 |  | 0.038 |
| 11(1) | 1(1)  | 4366.425 | 4163.381 |  | 0.008 |
| 11(1) | 2(1)  | 4008.805 | 3844.096 |  | 0.011 |
| 11(1) | 3(1)  | 3929.342 | 3777.072 |  | 0.008 |
| 11(1) | 4(1)  | 3584.522 | 3428.545 |  | 0.181 |
| 11(1) | 5(1)  | 2579.201 | 2505.442 |  | 0.306 |
| 11(1) | 6(1)  | 2379.606 | 2310.397 |  | 0.032 |
| 11(1) | 7(1)  | 2300.235 | 2239.180 |  | 0.318 |
| 11(1) | 8(1)  | 2196.784 | 2126.555 |  | 0.194 |
| 11(1) | 9(1)  | 1962.431 | 1908.745 |  | 0.191 |
| 11(1) | 10(1) | 1908.197 | 1851.830 |  | 0.474 |
| 12(1) | 1(1)  | 4107.694 | 3915.130 |  | 0.000 |
| 12(1) | 2(1)  | 3750.074 | 3595.709 |  | 0.052 |
| 12(1) | 3(1)  | 3670.611 | 3530.082 |  | 0.024 |
| 12(1) | 4(1)  | 3325.790 | 3187.874 |  | 0.015 |
| 12(1) | 5(1)  | 2320.470 | 2265.622 |  | 0.063 |
| 12(1) | 6(1)  | 2120.874 | 2063.655 |  | 0.028 |
| 12(1) | 7(1)  | 2041.504 | 1993.212 |  | 0.099 |
| 12(1) | 8(1)  | 1938.052 | 1882.879 |  | 0.033 |
| 12(1) | 9(1)  | 1703.700 | 1664.021 |  | 9.697 |
| 12(1) | 10(1) | 1649.465 | 1607.423 |  | 0.177 |
| 12(1) | 11(1) | 1534.746 | 1492.678 |  | 0.460 |
| 13(1) | 1(1)  | 3903.366 | 3720.802 |  | 0.033 |
| 13(1) | 2(1)  | 3545.746 | 3401.315 |  | 0.037 |
| 13(1) | 3(1)  | 3466.283 | 3335.337 |  | 0.012 |
| 13(1) | 4(1)  | 3121.462 | 2992.713 |  | 0.094 |
| 13(1) | 5(1)  | 2116.142 | 2068.092 |  | 0.063 |
| 13(1) | 6(1)  | 1916.546 | 1869.795 |  | 0.026 |
| 13(1) | 7(1)  | 1837.176 | 1799.722 |  | 0.024 |
| 13(1) | 8(1)  | 1733.724 | 1689.295 |  | 1.609 |
| 13(1) | 9(1)  | 1499.372 | 1470.352 |  | 0.745 |
| 13(1) | 10(1) | 1445.137 | 1414.321 |  | 0.185 |
| 13(1) | 11(1) | 1330.418 | 1300.590 |  | 0.171 |
| 13(1) | 12(1) | 1071.686 | 1055.048 |  | 0.577 |
| 14(1) | 1(1)  | 3809.776 | 3631.681 |  | 0.029 |
| 14(1) | 2(1)  | 3452.155 | 3312.329 |  | 0.156 |

|       |       |          |          |  |       |
|-------|-------|----------|----------|--|-------|
| 14(1) | 3(1)  | 3372.692 | 3246.882 |  | 0.003 |
| 14(1) | 4(1)  | 3027.872 | 2905.182 |  | 0.095 |
| 14(1) | 5(1)  | 2022.551 | 1982.154 |  | 0.101 |
| 14(1) | 6(1)  | 1822.956 | 1782.163 |  | 0.078 |
| 14(1) | 7(1)  | 1743.585 | 1710.805 |  | 0.016 |
| 14(1) | 8(1)  | 1640.134 | 1599.654 |  | 0.523 |
| 14(1) | 9(1)  | 1405.781 | 1380.852 |  | 1.027 |
| 14(1) | 10(1) | 1351.547 | 1327.243 |  | 0.148 |
| 14(1) | 11(1) | 1236.827 | 1212.291 |  | 0.050 |
| 14(1) | 12(1) | 978.096  | 963.278  |  | 0.920 |
| 14(1) | 13(1) | 773.768  | 771.311  |  | 0.284 |
| 15(1) | 1(1)  | 6565.595 | 6246.839 |  | 0.002 |
| 15(1) | 2(1)  | 6207.975 | 5895.754 |  | 0.249 |
| 15(1) | 3(1)  | 6128.512 | 5779.577 |  | 0.146 |
| 15(1) | 4(1)  | 5783.691 | 5520.501 |  | 0.001 |
| 15(1) | 5(1)  | 4778.370 | 4596.182 |  | 0.006 |
| 15(1) | 6(1)  | 4578.775 | 4381.939 |  | 0.079 |
| 15(1) | 7(1)  | 4499.404 | 4316.644 |  | 0.307 |
| 15(1) | 8(1)  | 4395.953 | 4216.031 |  | 0.186 |
| 15(1) | 9(1)  | 4161.601 | 3995.252 |  | 0.046 |
| 15(1) | 10(1) | 4107.366 | 3940.980 |  | 0.004 |
| 15(1) | 11(1) | 3992.647 | 3827.419 |  | 0.019 |
| 15(1) | 12(1) | 3733.915 | 3580.787 |  | 0.016 |
| 15(1) | 13(1) | 3529.587 | 3385.698 |  | 0.011 |
| 15(1) | 14(1) | 3435.997 | 3297.508 |  | 0.009 |
| 16(1) | 1(1)  | 4944.912 | 4723.344 |  | 0.001 |
| 16(1) | 2(1)  | 4587.292 | 4386.017 |  | 0.133 |
| 16(1) | 3(1)  | 4507.829 | 4319.314 |  | 0.173 |
| 16(1) | 4(1)  | 4163.009 | 3996.659 |  | 0.000 |
| 16(1) | 5(1)  | 3157.688 | 3074.330 |  | 0.003 |
| 16(1) | 6(1)  | 2958.093 | 2866.353 |  | 0.081 |
| 16(1) | 7(1)  | 2878.722 | 2798.401 |  | 0.103 |
| 16(1) | 8(1)  | 2775.271 | 2691.695 |  | 0.000 |
| 16(1) | 9(1)  | 2540.918 | 2468.604 |  | 0.044 |
| 16(1) | 10(1) | 2486.684 | 2416.619 |  | 0.026 |
| 16(1) | 11(1) | 2371.964 | 2304.137 |  | 0.022 |
| 16(1) | 12(1) | 2113.233 | 2056.647 |  | 0.008 |
| 16(1) | 13(1) | 1908.905 | 1861.396 |  | 0.007 |
| 16(1) | 14(1) | 1815.314 | 1775.170 |  | 0.013 |
| 16(1) | 15(1) | 4571.134 | 4381.144 |  | 0.142 |
| 17(1) | 1(1)  | 4534.564 | 4328.975 |  | 0.000 |
| 17(1) | 2(1)  | 4176.944 | 4007.912 |  | 0.023 |
| 17(1) | 3(1)  | 4097.481 | 3941.211 |  | 0.193 |
| 17(1) | 4(1)  | 3752.661 | 3604.235 |  | 0.000 |
| 17(1) | 5(1)  | 2747.340 | 2678.760 |  | 0.018 |

|       |       |          |          |  |       |
|-------|-------|----------|----------|--|-------|
| 17(1) | 6(1)  | 2547.745 | 2475.173 |  | 0.012 |
| 17(1) | 7(1)  | 2468.374 | 2405.043 |  | 0.223 |
| 17(1) | 8(1)  | 2364.923 | 2297.931 |  | 0.028 |
| 17(1) | 9(1)  | 2130.570 | 2079.642 |  | 0.001 |
| 17(1) | 10(1) | 2076.336 | 2025.251 |  | 0.000 |
| 17(1) | 11(1) | 1961.616 | 1911.922 |  | 0.005 |
| 17(1) | 12(1) | 1702.885 | 1664.432 |  | 0.000 |
| 17(1) | 13(1) | 1498.557 | 1470.789 |  | 0.458 |
| 17(1) | 14(1) | 1404.966 | 1380.558 |  | 0.117 |
| 17(1) | 15(1) | 4160.785 | 3990.332 |  | 0.059 |
| 17(1) | 16(1) | 2540.103 | 2467.756 |  | 0.109 |
| 18(1) | 1(1)  | 4301.606 | 4088.536 |  | 0.010 |
| 18(1) | 2(1)  | 3943.986 | 3783.061 |  | 0.001 |
| 18(1) | 3(1)  | 3864.523 | 3716.544 |  | 0.001 |
| 18(1) | 4(1)  | 3519.703 | 3374.297 |  | 0.002 |
| 18(1) | 5(1)  | 2514.382 | 2448.787 |  | 0.000 |
| 18(1) | 6(1)  | 2314.787 | 2250.978 |  | 0.010 |
| 18(1) | 7(1)  | 2235.416 | 2180.613 |  | 0.028 |
| 18(1) | 8(1)  | 2131.965 | 2068.640 |  | 0.134 |
| 18(1) | 9(1)  | 1897.612 | 1852.253 |  | 0.053 |
| 18(1) | 10(1) | 1843.378 | 1795.200 |  | 0.027 |
| 18(1) | 11(1) | 1728.658 | 1680.955 |  | 0.008 |
| 18(1) | 12(1) | 1469.927 | 1434.906 |  | 0.173 |
| 18(1) | 13(1) | 1265.599 | 1240.805 |  | 0.020 |
| 18(1) | 14(1) | 1172.008 | 1152.572 |  | 0.005 |
| 18(1) | 15(1) | 3927.828 | 3766.427 |  | 0.079 |
| 18(1) | 16(1) | 2307.145 | 2243.978 |  | 0.020 |
| 18(1) | 17(1) | 1896.797 | 1849.143 |  | 0.204 |
| 19(1) | 1(1)  | 3976.578 | 3791.371 |  | 0.002 |
| 19(1) | 2(1)  | 3618.958 | 3472.628 |  | 0.012 |
| 19(1) | 3(1)  | 3539.495 | 3407.240 |  | 0.001 |
| 19(1) | 4(1)  | 3194.675 | 3065.479 |  | 0.000 |
| 19(1) | 5(1)  | 2189.354 | 2140.680 |  | 0.057 |
| 19(1) | 6(1)  | 1989.759 | 1939.805 |  | 0.002 |
| 19(1) | 7(1)  | 1910.388 | 1871.813 |  | 0.068 |
| 19(1) | 8(1)  | 1806.937 | 1759.668 |  | 0.009 |
| 19(1) | 9(1)  | 1572.584 | 1543.478 |  | 0.171 |
| 19(1) | 10(1) | 1518.350 | 1488.623 |  | 0.394 |
| 19(1) | 11(1) | 1403.630 | 1373.296 |  | 0.089 |
| 19(1) | 12(1) | 1144.899 | 1124.476 |  | 0.007 |
| 19(1) | 13(1) | 940.571  | 931.667  |  | 0.000 |
| 19(1) | 14(1) | 846.980  | 844.116  |  | 0.042 |
| 19(1) | 15(1) | 3602.800 | 3457.874 |  | 0.182 |
| 19(1) | 16(1) | 1982.117 | 1932.029 |  | 0.023 |
| 19(1) | 17(1) | 1571.769 | 1543.977 |  | 0.007 |

|       |       |          |          |  |       |
|-------|-------|----------|----------|--|-------|
| 19(1) | 18(1) | 1338.811 | 1319.817 |  | 0.137 |
| 20(1) | 1(1)  | 3714.755 | 3447.708 |  | 0.002 |
| 20(1) | 2(1)  | 3357.135 | 3132.686 |  | 0.009 |
| 20(1) | 3(1)  | 3277.672 | 3067.365 |  | 0.004 |
| 20(1) | 4(1)  | 2932.851 | 2706.991 |  | 0.086 |
| 20(1) | 5(1)  | 1927.531 | 1803.473 |  | 0.004 |
| 20(1) | 6(1)  | 1727.935 | 1601.667 |  | 0.003 |
| 20(1) | 7(1)  | 1648.565 | 1532.182 |  | 0.000 |
| 20(1) | 8(1)  | 1545.113 | 1421.072 |  | 0.032 |
| 20(1) | 9(1)  | 1310.761 | 1201.580 |  | 0.005 |
| 20(1) | 10(1) | 1256.527 | 1139.004 |  | 0.486 |
| 20(1) | 11(1) | 1141.807 | 1029.229 |  | 0.379 |
| 20(1) | 12(1) | 883.075  | 785.303  |  | 0.487 |
| 20(1) | 13(1) | 678.747  | 590.579  |  | 0.112 |
| 20(1) | 14(1) | 585.157  | 501.660  |  | 0.002 |
| 20(1) | 15(1) | 3340.976 | 3117.798 |  | 0.010 |
| 20(1) | 16(1) | 1720.294 | 1593.792 |  | 0.006 |
| 20(1) | 17(1) | 1309.946 | 1202.333 |  | 1.660 |
| 20(1) | 18(1) | 1076.988 | 980.073  |  | 1.131 |
| 20(1) | 19(1) | 751.960  | 657.036  |  | 0.146 |
| 21(1) | 1(1)  | 3633.976 | 3441.682 |  | 0.000 |
| 21(1) | 2(1)  | 3276.356 | 3122.906 |  | 0.147 |
| 21(1) | 3(1)  | 3196.893 | 3059.259 |  | 0.034 |
| 21(1) | 4(1)  | 2852.072 | 2717.556 |  | 0.001 |
| 21(1) | 5(1)  | 1846.752 | 1791.551 |  | 0.004 |
| 21(1) | 6(1)  | 1647.156 | 1591.448 |  | 0.355 |
| 21(1) | 7(1)  | 1567.786 | 1522.781 |  | 0.010 |
| 21(1) | 8(1)  | 1464.334 | 1410.882 |  | 0.396 |
| 21(1) | 9(1)  | 1229.982 | 1190.374 |  | 0.000 |
| 21(1) | 10(1) | 1175.747 | 1140.453 |  | 0.038 |
| 21(1) | 11(1) | 1061.028 | 1022.974 |  | 1.568 |
| 21(1) | 12(1) | 802.296  | 773.148  |  | 1.164 |
| 21(1) | 13(1) | 597.968  | 581.296  |  | 0.028 |
| 21(1) | 14(1) | 504.378  | 495.319  |  | 0.239 |
| 21(1) | 15(1) | 3260.197 | 3110.529 |  | 0.562 |
| 21(1) | 16(1) | 1639.515 | 1583.669 |  | 1.841 |
| 21(1) | 17(1) | 1229.167 | 1189.813 |  | 0.077 |
| 21(1) | 18(1) | 996.209  | 962.230  |  | 2.450 |
| 21(1) | 19(1) | 671.181  | 655.188  |  | 0.276 |
| 21(1) | 20(1) | 409.357  | 308.797  |  | 0.010 |



**Table S5.** Unscaled harmonic ( $E_{\text{harm}}$ , in  $\text{cm}^{-1}$ ) and anharmonic ( $E_{\text{anharm}}$ , in  $\text{cm}^{-1}$ ) frequencies and absolute harmonic ( $I_{\text{harm}}$ , in  $\text{km mol}^{-1}$ ) and anharmonic ( $I_{\text{anharm}}$ , in  $\text{km mol}^{-1}$ ) IR intensities of the **sC** isomer of thioacetamide as computed at the B3LYP/6-311++G(3df,3pd) level of theory.

| Fundamental Bands |                   |                     |                   |                     |
|-------------------|-------------------|---------------------|-------------------|---------------------|
| Mode (Quanta)     | $E_{\text{harm}}$ | $E_{\text{anharm}}$ | $I_{\text{harm}}$ | $I_{\text{anharm}}$ |
| 1(1)              | 3481.372          | 3300.005            | 5.065             | 3.086               |
| 2(1)              | 3143.362          | 3001.404            | 4.662             | 5.982               |
| 3(1)              | 3038.754          | 2935.142            | 5.443             | 6.279               |
| 4(1)              | 2679.211          | 2556.881            | 1.144             | 1.298               |
| 5(1)              | 1693.593          | 1648.229            | 133.999           | 121.760             |
| 6(1)              | 1473.990          | 1430.558            | 11.875            | 9.030               |
| 7(1)              | 1405.603          | 1370.828            | 13.772            | 6.039               |
| 8(1)              | 1266.424          | 1226.639            | 233.967           | 210.598             |
| 9(1)              | 1078.989          | 1058.424            | 25.864            | 23.752              |
| 10(1)             | 996.465           | 966.179             | 9.078             | 9.416               |
| 11(1)             | 867.420           | 851.443             | 12.852            | 12.685              |
| 12(1)             | 616.223           | 606.647             | 42.333            | 37.482              |
| 13(1)             | 442.811           | 437.026             | 13.412            | 12.411              |
| 14(1)             | 328.244           | 325.305             | 2.818             | 2.967               |
| 15(1)             | 3093.430          | 2954.465            | 5.427             | 6.566               |
| 16(1)             | 1478.654          | 1434.216            | 12.157            | 6.638               |
| 17(1)             | 1069.535          | 1041.410            | 3.960             | 2.970               |
| 18(1)             | 855.485           | 835.624             | 54.406            | 52.829              |
| 19(1)             | 493.417           | 490.426             | 2.579             | 2.336               |
| 20(1)             | 278.579           | 277.706             | 8.031             | 9.390               |
| 21(1)             | 105.617           | 119.337             | 1.339             | 0.749               |
| Overtones         |                   |                     |                   |                     |
| Mode (Quanta)     | $E_{\text{harm}}$ | $E_{\text{anharm}}$ | $I_{\text{harm}}$ | $I_{\text{anharm}}$ |
| 1(2)              | 6962.743          | 6433.636            |                   | 4.057               |
| 2(2)              | 6286.724          | 5915.741            |                   | 0.556               |
| 3(2)              | 6077.508          | 5784.838            |                   | 0.063               |
| 4(2)              | 5358.422          | 5006.709            |                   | 0.300               |
| 5(2)              | 3387.185          | 3284.546            |                   | 1.866               |
| 6(2)              | 2947.979          | 2831.278            |                   | 0.040               |
| 7(2)              | 2811.205          | 2723.336            |                   | 0.079               |
| 8(2)              | 2532.849          | 2434.644            |                   | 0.828               |
| 9(2)              | 2157.978          | 2102.353            |                   | 0.141               |
| 10(2)             | 1992.929          | 1941.769            |                   | 0.474               |
| 11(2)             | 1734.839          | 1701.840            |                   | 9.774               |
| 12(2)             | 1232.447          | 1208.106            |                   | 17.392              |
| 13(2)             | 885.621           | 873.968             |                   | 0.318               |
| 14(2)             | 656.488           | 651.277             |                   | 0.002               |

|                   |                   |                     |                   |                     |
|-------------------|-------------------|---------------------|-------------------|---------------------|
| 15(2)             | 6186.860          | 5846.095            |                   | 0.484               |
| 16(2)             | 2957.309          | 2865.815            |                   | 0.161               |
| 17(2)             | 2139.070          | 2079.664            |                   | 0.117               |
| 18(2)             | 1710.970          | 1667.111            |                   | 0.860               |
| 19(2)             | 986.834           | 988.403             |                   | 0.390               |
| 20(2)             | 557.158           | 557.960             |                   | 5.497               |
| 21(2)             | 211.234           | 249.970             |                   | 0.004               |
| Combination Bands |                   |                     |                   |                     |
| Mode<br>(Quanta)  | $E_{\text{harm}}$ | $E_{\text{anharm}}$ | $I_{\text{harm}}$ | $I_{\text{anharm}}$ |
| 2(1) 1(1)         | 6624.733          | 6301.309            |                   | 0.003               |
| 3(1) 1(1)         | 6520.125          | 6212.035            |                   | 0.011               |
| 3(1) 2(1)         | 6182.116          | 5871.927            |                   | 0.091               |
| 4(1) 1(1)         | 6160.582          | 5856.829            |                   | 0.001               |
| 4(1) 2(1)         | 5822.573          | 5558.104            |                   | 0.003               |
| 4(1) 3(1)         | 5717.965          | 5469.020            |                   | 0.000               |
| 5(1) 1(1)         | 5174.964          | 4947.418            |                   | 0.106               |
| 5(1) 2(1)         | 4836.954          | 4654.391            |                   | 0.066               |
| 5(1) 3(1)         | 4732.347          | 4562.637            |                   | 0.040               |
| 5(1) 4(1)         | 4372.804          | 4207.885            |                   | 0.157               |
| 6(1) 1(1)         | 4955.361          | 4730.229            |                   | 0.076               |
| 6(1) 2(1)         | 4617.351          | 4420.897            |                   | 0.288               |
| 6(1) 3(1)         | 4512.744          | 4321.324            |                   | 0.099               |
| 6(1) 4(1)         | 4153.201          | 3987.446            |                   | 0.003               |
| 6(1) 5(1)         | 3167.582          | 3081.799            |                   | 0.281               |
| 7(1) 1(1)         | 4886.974          | 4670.473            |                   | 0.130               |
| 7(1) 2(1)         | 4548.964          | 4366.404            |                   | 0.270               |
| 7(1) 3(1)         | 4444.356          | 4294.312            |                   | 0.094               |
| 7(1) 4(1)         | 4084.813          | 3927.425            |                   | 0.003               |
| 7(1) 5(1)         | 3099.195          | 3020.139            |                   | 0.120               |
| 7(1) 6(1)         | 2879.592          | 2797.368            |                   | 0.268               |
| 8(1) 1(1)         | 4747.796          | 4525.116            |                   | 1.432               |
| 8(1) 2(1)         | 4409.786          | 4225.626            |                   | 0.058               |
| 8(1) 3(1)         | 4305.178          | 4138.371            |                   | 0.111               |
| 8(1) 4(1)         | 3945.635          | 3782.567            |                   | 0.022               |
| 8(1) 5(1)         | 2960.017          | 2875.613            |                   | 2.013               |
| 8(1) 6(1)         | 2740.414          | 2656.108            |                   | 0.051               |
| 8(1) 7(1)         | 2672.027          | 2594.904            |                   | 0.347               |
| 9(1) 1(1)         | 4560.361          | 4351.819            |                   | 0.030               |
| 9(1) 2(1)         | 4222.351          | 4046.202            |                   | 0.165               |
| 9(1) 3(1)         | 4117.743          | 3962.889            |                   | 0.169               |
| 9(1) 4(1)         | 3758.200          | 3609.016            |                   | 0.049               |
| 9(1) 5(1)         | 2772.582          | 2702.201            |                   | 0.505               |
| 9(1) 6(1)         | 2552.979          | 2479.319            |                   | 0.130               |
| 9(1) 7(1)         | 2484.592          | 2419.102            |                   | 0.118               |

|       |       |          |          |  |       |
|-------|-------|----------|----------|--|-------|
| 9(1)  | 8(1)  | 2345.414 | 2269.839 |  | 0.120 |
| 10(1) | 1(1)  | 4477.836 | 4271.810 |  | 0.037 |
| 10(1) | 2(1)  | 4139.826 | 3974.752 |  | 0.041 |
| 10(1) | 3(1)  | 4035.219 | 3884.395 |  | 0.045 |
| 10(1) | 4(1)  | 3675.676 | 3523.399 |  | 0.209 |
| 10(1) | 5(1)  | 2690.057 | 2621.739 |  | 0.437 |
| 10(1) | 6(1)  | 2470.454 | 2402.406 |  | 0.033 |
| 10(1) | 7(1)  | 2402.067 | 2340.437 |  | 0.345 |
| 10(1) | 8(1)  | 2262.889 | 2191.963 |  | 0.005 |
| 10(1) | 9(1)  | 2075.454 | 2022.098 |  | 0.377 |
| 11(1) | 1(1)  | 4348.791 | 4151.662 |  | 0.011 |
| 11(1) | 2(1)  | 4010.781 | 3853.208 |  | 0.026 |
| 11(1) | 3(1)  | 3906.174 | 3763.439 |  | 0.015 |
| 11(1) | 4(1)  | 3546.631 | 3400.840 |  | 0.146 |
| 11(1) | 5(1)  | 2561.012 | 2495.001 |  | 0.114 |
| 11(1) | 6(1)  | 2341.409 | 2279.573 |  | 0.040 |
| 11(1) | 7(1)  | 2273.022 | 2219.623 |  | 0.281 |
| 11(1) | 8(1)  | 2133.844 | 2074.912 |  | 0.012 |
| 11(1) | 9(1)  | 1946.409 | 1902.115 |  | 0.310 |
| 11(1) | 10(1) | 1863.884 | 1818.434 |  | 0.964 |
| 12(1) | 1(1)  | 4097.595 | 3906.906 |  | 0.413 |
| 12(1) | 2(1)  | 3759.585 | 3607.308 |  | 0.030 |
| 12(1) | 3(1)  | 3654.977 | 3518.868 |  | 0.082 |
| 12(1) | 4(1)  | 3295.434 | 3163.489 |  | 0.018 |
| 12(1) | 5(1)  | 2309.816 | 2258.933 |  | 0.051 |
| 12(1) | 6(1)  | 2090.213 | 2034.553 |  | 0.030 |
| 12(1) | 7(1)  | 2021.826 | 1976.550 |  | 0.104 |
| 12(1) | 8(1)  | 1882.648 | 1834.820 |  | 0.580 |
| 12(1) | 9(1)  | 1695.213 | 1662.343 |  | 0.014 |
| 12(1) | 10(1) | 1612.688 | 1575.270 |  | 0.070 |
| 12(1) | 11(1) | 1483.643 | 1457.150 |  | 2.898 |
| 13(1) | 1(1)  | 3924.182 | 3736.859 |  | 0.020 |
| 13(1) | 2(1)  | 3586.173 | 3438.574 |  | 0.006 |
| 13(1) | 3(1)  | 3481.565 | 3349.347 |  | 1.918 |
| 13(1) | 4(1)  | 3122.022 | 2994.199 |  | 0.002 |
| 13(1) | 5(1)  | 2136.403 | 2086.025 |  | 0.021 |
| 13(1) | 6(1)  | 1916.800 | 1867.499 |  | 0.003 |
| 13(1) | 7(1)  | 1848.413 | 1807.720 |  | 0.018 |
| 13(1) | 8(1)  | 1709.235 | 1663.617 |  | 5.660 |
| 13(1) | 9(1)  | 1521.800 | 1489.630 |  | 0.163 |
| 13(1) | 10(1) | 1439.275 | 1408.114 |  | 0.027 |
| 13(1) | 11(1) | 1310.230 | 1287.851 |  | 0.711 |
| 13(1) | 12(1) | 1059.034 | 1035.300 |  | 0.350 |
| 14(1) | 1(1)  | 3809.616 | 3624.501 |  | 0.014 |
| 14(1) | 2(1)  | 3471.606 | 3326.557 |  | 0.075 |

|       |       |          |          |  |       |
|-------|-------|----------|----------|--|-------|
| 14(1) | 3(1)  | 3366.998 | 3237.560 |  | 0.034 |
| 14(1) | 4(1)  | 3007.455 | 2882.188 |  | 0.042 |
| 14(1) | 5(1)  | 2021.837 | 1976.562 |  | 0.104 |
| 14(1) | 6(1)  | 1802.234 | 1756.583 |  | 0.024 |
| 14(1) | 7(1)  | 1733.847 | 1694.985 |  | 0.037 |
| 14(1) | 8(1)  | 1594.669 | 1551.304 |  | 0.025 |
| 14(1) | 9(1)  | 1407.233 | 1377.863 |  | 7.898 |
| 14(1) | 10(1) | 1324.709 | 1296.690 |  | 0.037 |
| 14(1) | 11(1) | 1195.664 | 1176.137 |  | 0.200 |
| 14(1) | 12(1) | 944.468  | 930.342  |  | 0.076 |
| 14(1) | 13(1) | 771.055  | 762.970  |  | 0.239 |
| 15(1) | 1(1)  | 6574.802 | 6254.662 |  | 0.000 |
| 15(1) | 2(1)  | 6236.792 | 5939.644 |  | 0.172 |
| 15(1) | 3(1)  | 6132.184 | 5768.894 |  | 0.200 |
| 15(1) | 4(1)  | 5772.641 | 5511.519 |  | 0.000 |
| 15(1) | 5(1)  | 4787.023 | 4604.934 |  | 0.021 |
| 15(1) | 6(1)  | 4567.420 | 4368.681 |  | 0.130 |
| 15(1) | 7(1)  | 4499.033 | 4317.467 |  | 0.220 |
| 15(1) | 8(1)  | 4359.855 | 4181.315 |  | 0.144 |
| 15(1) | 9(1)  | 4172.419 | 4005.189 |  | 0.088 |
| 15(1) | 10(1) | 4089.895 | 3927.030 |  | 0.031 |
| 15(1) | 11(1) | 3960.850 | 3806.154 |  | 0.002 |
| 15(1) | 12(1) | 3709.654 | 3561.492 |  | 0.043 |
| 15(1) | 13(1) | 3536.241 | 3391.589 |  | 0.008 |
| 15(1) | 14(1) | 3421.674 | 3280.085 |  | 0.020 |
| 16(1) | 1(1)  | 4960.026 | 4734.087 |  | 0.000 |
| 16(1) | 2(1)  | 4622.016 | 4417.526 |  | 0.158 |
| 16(1) | 3(1)  | 4517.408 | 4329.101 |  | 0.184 |
| 16(1) | 4(1)  | 4157.865 | 3991.075 |  | 0.001 |
| 16(1) | 5(1)  | 3172.247 | 3085.588 |  | 0.002 |
| 16(1) | 6(1)  | 2952.644 | 2859.157 |  | 0.062 |
| 16(1) | 7(1)  | 2884.257 | 2798.255 |  | 0.112 |
| 16(1) | 8(1)  | 2745.079 | 2660.363 |  | 0.000 |
| 16(1) | 9(1)  | 2557.644 | 2481.649 |  | 0.025 |
| 16(1) | 10(1) | 2475.119 | 2403.011 |  | 0.020 |
| 16(1) | 11(1) | 2346.074 | 2285.060 |  | 0.023 |
| 16(1) | 12(1) | 2094.878 | 2040.919 |  | 0.012 |
| 16(1) | 13(1) | 1921.465 | 1870.906 |  | 0.003 |
| 16(1) | 14(1) | 1806.899 | 1760.681 |  | 0.014 |
| 16(1) | 15(1) | 4572.085 | 4380.638 |  | 0.166 |
| 17(1) | 1(1)  | 4550.907 | 4339.451 |  | 0.019 |
| 17(1) | 2(1)  | 4212.897 | 4039.529 |  | 0.021 |
| 17(1) | 3(1)  | 4108.289 | 3947.541 |  | 0.205 |
| 17(1) | 4(1)  | 3748.746 | 3598.266 |  | 0.000 |
| 17(1) | 5(1)  | 2763.128 | 2690.930 |  | 0.002 |

|       |       |          |          |  |       |
|-------|-------|----------|----------|--|-------|
| 17(1) | 6(1)  | 2543.525 | 2465.105 |  | 0.030 |
| 17(1) | 7(1)  | 2475.138 | 2407.491 |  | 0.193 |
| 17(1) | 8(1)  | 2335.960 | 2266.636 |  | 0.037 |
| 17(1) | 9(1)  | 2148.524 | 2093.361 |  | 0.005 |
| 17(1) | 10(1) | 2066.000 | 2012.274 |  | 0.000 |
| 17(1) | 11(1) | 1936.955 | 1891.313 |  | 0.016 |
| 17(1) | 12(1) | 1685.758 | 1648.561 |  | 0.002 |
| 17(1) | 13(1) | 1512.346 | 1478.636 |  | 0.077 |
| 17(1) | 14(1) | 1397.779 | 1365.824 |  | 0.131 |
| 17(1) | 15(1) | 4162.965 | 3989.616 |  | 0.077 |
| 17(1) | 16(1) | 2548.190 | 2470.816 |  | 0.088 |
| 18(1) | 1(1)  | 4336.857 | 4120.066 |  | 0.016 |
| 18(1) | 2(1)  | 3998.847 | 3836.883 |  | 0.001 |
| 18(1) | 3(1)  | 3894.239 | 3746.842 |  | 0.000 |
| 18(1) | 4(1)  | 3534.696 | 3392.759 |  | 0.000 |
| 18(1) | 5(1)  | 2549.078 | 2480.835 |  | 0.002 |
| 18(1) | 6(1)  | 2329.475 | 2265.533 |  | 0.005 |
| 18(1) | 7(1)  | 2261.088 | 2205.937 |  | 0.049 |
| 18(1) | 8(1)  | 2121.910 | 2056.944 |  | 0.169 |
| 18(1) | 9(1)  | 1934.474 | 1888.515 |  | 0.051 |
| 18(1) | 10(1) | 1851.950 | 1807.594 |  | 0.011 |
| 18(1) | 11(1) | 1722.905 | 1685.001 |  | 0.008 |
| 18(1) | 12(1) | 1471.709 | 1441.104 |  | 1.096 |
| 18(1) | 13(1) | 1298.296 | 1272.424 |  | 0.041 |
| 18(1) | 14(1) | 1183.729 | 1161.640 |  | 0.000 |
| 18(1) | 15(1) | 3948.915 | 3789.042 |  | 0.085 |
| 18(1) | 16(1) | 2334.140 | 2270.127 |  | 0.023 |
| 18(1) | 17(1) | 1925.020 | 1873.088 |  | 0.246 |
| 19(1) | 1(1)  | 3974.789 | 3789.047 |  | 0.006 |
| 19(1) | 2(1)  | 3636.779 | 3491.333 |  | 0.006 |
| 19(1) | 3(1)  | 3532.171 | 3402.322 |  | 0.008 |
| 19(1) | 4(1)  | 3172.628 | 3047.290 |  | 0.000 |
| 19(1) | 5(1)  | 2187.010 | 2139.583 |  | 0.040 |
| 19(1) | 6(1)  | 1967.407 | 1918.547 |  | 0.007 |
| 19(1) | 7(1)  | 1899.020 | 1861.148 |  | 0.083 |
| 19(1) | 8(1)  | 1759.842 | 1713.909 |  | 0.013 |
| 19(1) | 9(1)  | 1572.406 | 1545.014 |  | 0.126 |
| 19(1) | 10(1) | 1489.882 | 1465.576 |  | 3.442 |
| 19(1) | 11(1) | 1360.837 | 1342.269 |  | 0.022 |
| 19(1) | 12(1) | 1109.640 | 1096.277 |  | 0.010 |
| 19(1) | 13(1) | 936.228  | 927.772  |  | 0.029 |
| 19(1) | 14(1) | 821.661  | 816.503  |  | 0.005 |
| 19(1) | 15(1) | 3586.847 | 3445.002 |  | 0.215 |
| 19(1) | 16(1) | 1972.072 | 1919.968 |  | 0.022 |
| 19(1) | 17(1) | 1562.952 | 1533.892 |  | 0.022 |

|       |       |          |          |  |       |
|-------|-------|----------|----------|--|-------|
| 19(1) | 18(1) | 1348.902 | 1328.566 |  | 5.014 |
| 20(1) | 1(1)  | 3759.950 | 3576.882 |  | 0.003 |
| 20(1) | 2(1)  | 3421.941 | 3277.930 |  | 0.004 |
| 20(1) | 3(1)  | 3317.333 | 3189.636 |  | 0.002 |
| 20(1) | 4(1)  | 2957.790 | 2823.259 |  | 0.000 |
| 20(1) | 5(1)  | 1972.171 | 1930.196 |  | 0.010 |
| 20(1) | 6(1)  | 1752.568 | 1707.869 |  | 0.008 |
| 20(1) | 7(1)  | 1684.181 | 1648.340 |  | 0.000 |
| 20(1) | 8(1)  | 1545.003 | 1504.829 |  | 0.001 |
| 20(1) | 9(1)  | 1357.568 | 1328.864 |  | 0.001 |
| 20(1) | 10(1) | 1275.043 | 1251.091 |  | 0.097 |
| 20(1) | 11(1) | 1145.998 | 1130.279 |  | 0.132 |
| 20(1) | 12(1) | 894.802  | 888.970  |  | 0.000 |
| 20(1) | 13(1) | 721.390  | 712.565  |  | 0.112 |
| 20(1) | 14(1) | 606.823  | 600.469  |  | 0.166 |
| 20(1) | 15(1) | 3372.009 | 3231.977 |  | 0.014 |
| 20(1) | 16(1) | 1757.233 | 1711.048 |  | 0.022 |
| 20(1) | 17(1) | 1348.114 | 1318.636 |  | 0.003 |
| 20(1) | 18(1) | 1134.064 | 1117.407 |  | 0.135 |
| 20(1) | 19(1) | 771.996  | 764.429  |  | 0.052 |
| 21(1) | 1(1)  | 3586.988 | 3418.371 |  | 0.001 |
| 21(1) | 2(1)  | 3248.979 | 3118.207 |  | 0.088 |
| 21(1) | 3(1)  | 3144.371 | 3033.830 |  | 0.037 |
| 21(1) | 4(1)  | 2784.828 | 2673.023 |  | 0.000 |
| 21(1) | 5(1)  | 1799.209 | 1770.533 |  | 0.001 |
| 21(1) | 6(1)  | 1579.606 | 1550.005 |  | 0.726 |
| 21(1) | 7(1)  | 1511.219 | 1494.151 |  | 0.495 |
| 21(1) | 8(1)  | 1372.041 | 1344.495 |  | 0.072 |
| 21(1) | 9(1)  | 1184.606 | 1170.219 |  | 0.028 |
| 21(1) | 10(1) | 1102.081 | 1093.551 |  | 0.044 |
| 21(1) | 11(1) | 973.036  | 976.944  |  | 0.006 |
| 21(1) | 12(1) | 721.840  | 725.790  |  | 0.091 |
| 21(1) | 13(1) | 548.427  | 554.142  |  | 0.015 |
| 21(1) | 14(1) | 433.861  | 443.537  |  | 0.004 |
| 21(1) | 15(1) | 3199.047 | 3077.050 |  | 0.746 |
| 21(1) | 16(1) | 1584.271 | 1552.602 |  | 0.496 |
| 21(1) | 17(1) | 1175.152 | 1155.293 |  | 3.152 |
| 21(1) | 18(1) | 961.102  | 954.509  |  | 0.685 |
| 21(1) | 19(1) | 599.034  | 611.111  |  | 0.149 |
| 21(1) | 20(1) | 384.196  | 404.297  |  | 0.451 |

**Table S6.** Unscaled harmonic ( $E_{\text{harm}}$ , in  $\text{cm}^{-1}$ ) and anharmonic ( $E_{\text{anharm}}$ , in  $\text{cm}^{-1}$ ) frequencies and absolute harmonic ( $I_{\text{harm}}$ , in  $\text{km mol}^{-1}$ ) and anharmonic ( $I_{\text{anharm}}$ , in  $\text{km mol}^{-1}$ ) IR intensities of the **sT** isomer of thioacetamide as computed at the B3LYP/6-311++G(3df,3pd) level of theory.

| Fundamental Bands |                   |                     |                   |                     |
|-------------------|-------------------|---------------------|-------------------|---------------------|
| Mode (Quanta)     | $E_{\text{harm}}$ | $E_{\text{anharm}}$ | $I_{\text{harm}}$ | $I_{\text{anharm}}$ |
| 1(1)              | 3466.499          | 3289.488            | 4.648             | 4.107               |
| 2(1)              | 3136.961          | 2995.619            | 6.441             | 8.386               |
| 3(1)              | 3036.968          | 2934.482            | 6.385             | 7.676               |
| 4(1)              | 2684.153          | 2557.785            | 0.314             | 1.350               |
| 5(1)              | 1690.374          | 1645.350            | 139.120           | 73.668              |
| 6(1)              | 1474.512          | 1431.872            | 8.187             | 7.878               |
| 7(1)              | 1403.857          | 1369.986            | 12.347            | 11.169              |
| 8(1)              | 1283.256          | 1243.449            | 229.864           | 211.895             |
| 9(1)              | 1076.784          | 1053.917            | 23.930            | 21.590              |
| 10(1)             | 995.972           | 966.037             | 7.271             | 8.690               |
| 11(1)             | 875.549           | 857.188             | 7.768             | 7.104               |
| 12(1)             | 621.902           | 607.671             | 33.465            | 34.609              |
| 13(1)             | 421.153           | 416.251             | 14.473            | 12.672              |
| 14(1)             | 334.562           | 336.971             | 0.926             | 0.684               |
| 15(1)             | 3093.399          | 2954.296            | 6.161             | 7.867               |
| 16(1)             | 1481.126          | 1434.706            | 11.969            | 7.405               |
| 17(1)             | 1070.886          | 1041.181            | 4.536             | 2.277               |
| 18(1)             | 870.304           | 848.646             | 49.856            | 50.092              |
| 19(1)             | 497.010           | 489.759             | 3.875             | 3.032               |
| 20(1)             | 203.364           | 87.783              | 16.509            | 10.897              |
| 21(1)             | 170.380           | 149.972             | 0.000             | 3.907               |
| Overtones         |                   |                     |                   |                     |
| Mode (Quanta)     | $E_{\text{harm}}$ | $E_{\text{anharm}}$ | $I_{\text{harm}}$ | $I_{\text{anharm}}$ |
| 1(2)              | 6932.998          | 6412.596            |                   | 4.039               |
| 2(2)              | 6273.922          | 5906.125            |                   | 0.592               |
| 3(2)              | 6073.935          | 5781.449            |                   | 0.065               |
| 4(2)              | 5368.305          | 5008.038            |                   | 0.354               |
| 5(2)              | 3380.748          | 3271.538            |                   | 1.937               |
| 6(2)              | 2949.024          | 2833.202            |                   | 0.012               |
| 7(2)              | 2807.713          | 2721.684            |                   | 0.098               |
| 8(2)              | 2566.513          | 2467.605            |                   | 0.820               |
| 9(2)              | 2153.569          | 2104.342            |                   | 0.221               |
| 10(2)             | 1991.944          | 1946.926            |                   | 0.326               |
| 11(2)             | 1751.099          | 1716.607            |                   | 7.598               |
| 12(2)             | 1243.804          | 1210.177            |                   | 13.884              |
| 13(2)             | 842.306           | 832.224             |                   | 0.011               |
| 14(2)             | 669.125           | 670.012             |                   | 0.053               |

|                   |                   |                     |                   |                     |
|-------------------|-------------------|---------------------|-------------------|---------------------|
| 15(2)             | 6186.797          | 5845.451            |                   | 0.487               |
| 16(2)             | 2962.251          | 2870.279            |                   | 0.215               |
| 17(2)             | 2141.772          | 2079.087            |                   | 0.137               |
| 18(2)             | 1740.608          | 1692.818            |                   | 1.120               |
| 19(2)             | 994.020           | 988.808             |                   | 0.478               |
| 20(2)             | 406.727           | 79.144              |                   | 0.614               |
| 21(2)             | 340.761           | 283.317             |                   | 0.028               |
| Combination Bands |                   |                     |                   |                     |
| Mode<br>(Quanta)  | $E_{\text{harm}}$ | $E_{\text{anharm}}$ | $I_{\text{harm}}$ | $I_{\text{anharm}}$ |
| 2(1) 1(1)         | 6603.460          | 6284.940            |                   | 0.004               |
| 3(1) 1(1)         | 6503.467          | 6199.610            |                   | 0.010               |
| 3(1) 2(1)         | 6173.928          | 5860.363            |                   | 0.104               |
| 4(1) 1(1)         | 6150.652          | 5846.343            |                   | 0.012               |
| 4(1) 2(1)         | 5821.113          | 5553.365            |                   | 0.007               |
| 4(1) 3(1)         | 5721.120          | 5468.101            |                   | 0.007               |
| 5(1) 1(1)         | 5156.873          | 4930.757            |                   | 0.177               |
| 5(1) 2(1)         | 4827.335          | 4642.174            |                   | 0.061               |
| 5(1) 3(1)         | 4727.342          | 4553.896            |                   | 0.047               |
| 5(1) 4(1)         | 4374.527          | 4200.160            |                   | 0.070               |
| 6(1) 1(1)         | 4941.011          | 4721.126            |                   | 0.078               |
| 6(1) 2(1)         | 4611.473          | 4416.422            |                   | 0.288               |
| 6(1) 3(1)         | 4511.480          | 4320.813            |                   | 0.110               |
| 6(1) 4(1)         | 4158.664          | 3989.607            |                   | 0.031               |
| 6(1) 5(1)         | 3164.886          | 3076.464            |                   | 0.233               |
| 7(1) 1(1)         | 4870.356          | 4659.466            |                   | 0.103               |
| 7(1) 2(1)         | 4540.817          | 4359.780            |                   | 0.270               |
| 7(1) 3(1)         | 4440.824          | 4291.283            |                   | 0.122               |
| 7(1) 4(1)         | 4088.009          | 3927.680            |                   | 0.000               |
| 7(1) 5(1)         | 3094.231          | 3012.828            |                   | 0.132               |
| 7(1) 6(1)         | 2878.368          | 2797.813            |                   | 0.263               |
| 8(1) 1(1)         | 4749.755          | 4532.376            |                   | 1.221               |
| 8(1) 2(1)         | 4420.217          | 4236.879            |                   | 0.065               |
| 8(1) 3(1)         | 4320.224          | 4153.122            |                   | 0.103               |
| 8(1) 4(1)         | 3967.409          | 3801.011            |                   | 0.095               |
| 8(1) 5(1)         | 2973.630          | 2884.818            |                   | 2.128               |
| 8(1) 6(1)         | 2757.768          | 2674.278            |                   | 0.038               |
| 8(1) 7(1)         | 2687.113          | 2610.683            |                   | 0.296               |
| 9(1) 1(1)         | 4543.283          | 4342.365            |                   | 0.037               |
| 9(1) 2(1)         | 4213.745          | 4041.824            |                   | 0.122               |
| 9(1) 3(1)         | 4113.752          | 3962.132            |                   | 0.177               |
| 9(1) 4(1)         | 3760.937          | 3611.817            |                   | 0.011               |
| 9(1) 5(1)         | 2767.158          | 2694.569            |                   | 0.368               |
| 9(1) 6(1)         | 2551.296          | 2481.469            |                   | 0.114               |
| 9(1) 7(1)         | 2480.641          | 2420.130            |                   | 0.115               |



|       |       |          |          |  |        |
|-------|-------|----------|----------|--|--------|
| 9(1)  | 8(1)  | 2360.041 | 2286.644 |  | 0.092  |
| 10(1) | 1(1)  | 4462.471 | 4264.596 |  | 0.026  |
| 10(1) | 2(1)  | 4132.933 | 3970.961 |  | 0.017  |
| 10(1) | 3(1)  | 4032.940 | 3883.969 |  | 0.052  |
| 10(1) | 4(1)  | 3680.125 | 3527.443 |  | 0.097  |
| 10(1) | 5(1)  | 2686.346 | 2617.973 |  | 0.029  |
| 10(1) | 6(1)  | 2470.484 | 2405.638 |  | 0.031  |
| 10(1) | 7(1)  | 2399.829 | 2341.612 |  | 0.262  |
| 10(1) | 8(1)  | 2279.228 | 2211.929 |  | 0.037  |
| 10(1) | 9(1)  | 2072.756 | 2026.181 |  | 0.495  |
| 11(1) | 1(1)  | 4342.048 | 4147.323 |  | 0.022  |
| 11(1) | 2(1)  | 4012.510 | 3853.287 |  | 0.005  |
| 11(1) | 3(1)  | 3912.517 | 3766.896 |  | 0.003  |
| 11(1) | 4(1)  | 3559.702 | 3405.210 |  | 0.218  |
| 11(1) | 5(1)  | 2565.924 | 2492.742 |  | 0.036  |
| 11(1) | 6(1)  | 2350.061 | 2287.830 |  | 0.043  |
| 11(1) | 7(1)  | 2279.406 | 2225.213 |  | 0.234  |
| 11(1) | 8(1)  | 2158.806 | 2096.939 |  | 0.017  |
| 11(1) | 9(1)  | 1952.334 | 1909.231 |  | 0.237  |
| 11(1) | 10(1) | 1871.522 | 1828.665 |  | 1.279  |
| 12(1) | 1(1)  | 4088.401 | 3897.627 |  | 0.394  |
| 12(1) | 2(1)  | 3758.863 | 3602.739 |  | 0.022  |
| 12(1) | 3(1)  | 3658.869 | 3517.874 |  | 0.067  |
| 12(1) | 4(1)  | 3306.054 | 3165.338 |  | 0.022  |
| 12(1) | 5(1)  | 2312.276 | 2250.716 |  | 0.059  |
| 12(1) | 6(1)  | 2096.414 | 2038.197 |  | 0.027  |
| 12(1) | 7(1)  | 2025.758 | 1976.485 |  | 0.113  |
| 12(1) | 8(1)  | 1905.158 | 1851.818 |  | 0.335  |
| 12(1) | 9(1)  | 1698.686 | 1666.059 |  | 45.105 |
| 12(1) | 10(1) | 1617.874 | 1579.411 |  | 0.520  |
| 12(1) | 11(1) | 1497.451 | 1461.499 |  | 0.551  |
| 13(1) | 1(1)  | 3887.652 | 3704.716 |  | 0.047  |
| 13(1) | 2(1)  | 3558.114 | 3412.120 |  | 0.027  |
| 13(1) | 3(1)  | 3458.121 | 3326.492 |  | 0.017  |
| 13(1) | 4(1)  | 3105.306 | 2973.433 |  | 0.092  |
| 13(1) | 5(1)  | 2111.527 | 2057.893 |  | 0.089  |
| 13(1) | 6(1)  | 1895.665 | 1847.647 |  | 0.007  |
| 13(1) | 7(1)  | 1825.010 | 1786.084 |  | 0.023  |
| 13(1) | 8(1)  | 1704.410 | 1661.091 |  | 17.253 |
| 13(1) | 9(1)  | 1497.938 | 1473.030 |  | 0.450  |
| 13(1) | 10(1) | 1417.125 | 1389.714 |  | 0.034  |
| 13(1) | 11(1) | 1296.703 | 1272.870 |  | 0.085  |
| 13(1) | 12(1) | 1043.055 | 1019.267 |  | 0.630  |
| 14(1) | 1(1)  | 3801.061 | 3623.479 |  | 0.003  |
| 14(1) | 2(1)  | 3471.523 | 3330.101 |  | 0.118  |

|       |       |          |          |  |       |
|-------|-------|----------|----------|--|-------|
| 14(1) | 3(1)  | 3371.530 | 3245.002 |  | 0.016 |
| 14(1) | 4(1)  | 3018.715 | 2892.619 |  | 0.067 |
| 14(1) | 5(1)  | 2024.936 | 1979.089 |  | 0.160 |
| 14(1) | 6(1)  | 1809.074 | 1767.390 |  | 0.036 |
| 14(1) | 7(1)  | 1738.419 | 1704.389 |  | 0.046 |
| 14(1) | 8(1)  | 1617.819 | 1577.517 |  | 0.083 |
| 14(1) | 9(1)  | 1411.347 | 1387.671 |  | 0.045 |
| 14(1) | 10(1) | 1330.534 | 1309.931 |  | 0.872 |
| 14(1) | 11(1) | 1210.112 | 1192.604 |  | 0.027 |
| 14(1) | 12(1) | 956.464  | 939.937  |  | 0.051 |
| 14(1) | 13(1) | 755.715  | 751.179  |  | 0.228 |
| 15(1) | 1(1)  | 6559.898 | 6243.985 |  | 0.000 |
| 15(1) | 2(1)  | 6230.359 | 5931.700 |  | 0.188 |
| 15(1) | 3(1)  | 6130.366 | 5768.248 |  | 0.206 |
| 15(1) | 4(1)  | 5777.551 | 5512.477 |  | 0.001 |
| 15(1) | 5(1)  | 4783.773 | 4598.084 |  | 0.020 |
| 15(1) | 6(1)  | 4567.911 | 4370.200 |  | 0.127 |
| 15(1) | 7(1)  | 4497.255 | 4316.510 |  | 0.232 |
| 15(1) | 8(1)  | 4376.655 | 4197.933 |  | 0.143 |
| 15(1) | 9(1)  | 4170.183 | 4006.679 |  | 0.099 |
| 15(1) | 10(1) | 4089.371 | 3928.161 |  | 0.010 |
| 15(1) | 11(1) | 3968.948 | 3811.274 |  | 0.011 |
| 15(1) | 12(1) | 3715.300 | 3562.434 |  | 0.040 |
| 15(1) | 13(1) | 3514.552 | 3370.678 |  | 0.014 |
| 15(1) | 14(1) | 3427.961 | 3289.451 |  | 0.012 |
| 16(1) | 1(1)  | 4947.625 | 4726.280 |  | 0.000 |
| 16(1) | 2(1)  | 4618.086 | 4414.526 |  | 0.160 |
| 16(1) | 3(1)  | 4518.093 | 4329.496 |  | 0.179 |
| 16(1) | 4(1)  | 4165.278 | 3994.534 |  | 0.000 |
| 16(1) | 5(1)  | 3171.500 | 3081.678 |  | 0.001 |
| 16(1) | 6(1)  | 2955.638 | 2862.877 |  | 0.084 |
| 16(1) | 7(1)  | 2884.982 | 2801.681 |  | 0.121 |
| 16(1) | 8(1)  | 2764.382 | 2679.722 |  | 0.000 |
| 16(1) | 9(1)  | 2557.910 | 2485.727 |  | 0.019 |
| 16(1) | 10(1) | 2477.098 | 2410.402 |  | 0.030 |
| 16(1) | 11(1) | 2356.675 | 2293.614 |  | 0.011 |
| 16(1) | 12(1) | 2103.028 | 2043.501 |  | 0.010 |
| 16(1) | 13(1) | 1902.279 | 1850.556 |  | 0.006 |
| 16(1) | 14(1) | 1815.688 | 1772.787 |  | 0.012 |
| 16(1) | 15(1) | 4574.524 | 4383.415 |  | 0.150 |
| 17(1) | 1(1)  | 4537.385 | 4328.850 |  | 0.020 |
| 17(1) | 2(1)  | 4207.847 | 4033.528 |  | 0.023 |
| 17(1) | 3(1)  | 4107.854 | 3945.459 |  | 0.202 |
| 17(1) | 4(1)  | 3755.039 | 3598.902 |  | 0.000 |
| 17(1) | 5(1)  | 2761.260 | 2684.140 |  | 0.004 |

|       |       |          |          |  |       |
|-------|-------|----------|----------|--|-------|
| 17(1) | 6(1)  | 2545.398 | 2466.641 |  | 0.021 |
| 17(1) | 7(1)  | 2474.743 | 2406.300 |  | 0.163 |
| 17(1) | 8(1)  | 2354.142 | 2283.264 |  | 0.039 |
| 17(1) | 9(1)  | 2147.670 | 2094.410 |  | 0.007 |
| 17(1) | 10(1) | 2066.858 | 2014.397 |  | 0.001 |
| 17(1) | 11(1) | 1946.435 | 1894.633 |  | 0.006 |
| 17(1) | 12(1) | 1692.788 | 1649.263 |  | 0.000 |
| 17(1) | 13(1) | 1492.039 | 1460.050 |  | 2.683 |
| 17(1) | 14(1) | 1405.448 | 1375.020 |  | 0.108 |
| 17(1) | 15(1) | 4164.285 | 3989.309 |  | 0.082 |
| 17(1) | 16(1) | 2552.012 | 2470.740 |  | 0.077 |
| 18(1) | 1(1)  | 4336.803 | 4124.322 |  | 0.017 |
| 18(1) | 2(1)  | 4007.265 | 3844.065 |  | 0.001 |
| 18(1) | 3(1)  | 3907.271 | 3757.768 |  | 0.000 |
| 18(1) | 4(1)  | 3554.456 | 3405.680 |  | 0.003 |
| 18(1) | 5(1)  | 2560.678 | 2487.894 |  | 0.003 |
| 18(1) | 6(1)  | 2344.816 | 2279.873 |  | 0.004 |
| 18(1) | 7(1)  | 2274.160 | 2218.056 |  | 0.048 |
| 18(1) | 8(1)  | 2153.560 | 2086.772 |  | 0.154 |
| 18(1) | 9(1)  | 1947.088 | 1903.146 |  | 0.051 |
| 18(1) | 10(1) | 1866.276 | 1820.687 |  | 0.017 |
| 18(1) | 11(1) | 1745.853 | 1702.770 |  | 0.000 |
| 18(1) | 12(1) | 1492.206 | 1456.299 |  | 0.535 |
| 18(1) | 13(1) | 1291.457 | 1264.753 |  | 0.025 |
| 18(1) | 14(1) | 1204.866 | 1183.444 |  | 0.001 |
| 18(1) | 15(1) | 3963.702 | 3801.862 |  | 0.091 |
| 18(1) | 16(1) | 2351.429 | 2284.574 |  | 0.020 |
| 18(1) | 17(1) | 1941.190 | 1885.679 |  | 0.284 |
| 19(1) | 1(1)  | 3963.509 | 3778.329 |  | 0.008 |
| 19(1) | 2(1)  | 3633.971 | 3484.867 |  | 0.006 |
| 19(1) | 3(1)  | 3533.978 | 3399.531 |  | 0.005 |
| 19(1) | 4(1)  | 3181.162 | 3047.456 |  | 0.000 |
| 19(1) | 5(1)  | 2187.384 | 2132.442 |  | 0.059 |
| 19(1) | 6(1)  | 1971.522 | 1919.433 |  | 0.005 |
| 19(1) | 7(1)  | 1900.866 | 1859.635 |  | 0.077 |
| 19(1) | 8(1)  | 1780.266 | 1729.990 |  | 0.011 |
| 19(1) | 9(1)  | 1573.794 | 1545.365 |  | 0.102 |
| 19(1) | 10(1) | 1492.982 | 1466.298 |  | 0.013 |
| 19(1) | 11(1) | 1372.559 | 1347.387 |  | 0.020 |
| 19(1) | 12(1) | 1118.912 | 1095.957 |  | 0.008 |
| 19(1) | 13(1) | 918.163  | 905.745  |  | 0.040 |
| 19(1) | 14(1) | 831.572  | 824.338  |  | 0.002 |
| 19(1) | 15(1) | 3590.409 | 3444.117 |  | 0.199 |
| 19(1) | 16(1) | 1978.136 | 1924.629 |  | 0.025 |
| 19(1) | 17(1) | 1567.896 | 1532.591 |  | 0.114 |

|       |       |          |          |  |       |
|-------|-------|----------|----------|--|-------|
| 19(1) | 18(1) | 1367.314 | 1340.180 |  | 3.697 |
| 20(1) | 1(1)  | 3669.863 | 3378.560 |  | 0.003 |
| 20(1) | 2(1)  | 3340.325 | 3082.821 |  | 0.006 |
| 20(1) | 3(1)  | 3240.331 | 2997.980 |  | 0.004 |
| 20(1) | 4(1)  | 2887.516 | 2626.732 |  | 0.018 |
| 20(1) | 5(1)  | 1893.738 | 1734.161 |  | 0.003 |
| 20(1) | 6(1)  | 1677.876 | 1518.927 |  | 0.002 |
| 20(1) | 7(1)  | 1607.220 | 1458.047 |  | 0.000 |
| 20(1) | 8(1)  | 1486.620 | 1331.938 |  | 0.993 |
| 20(1) | 9(1)  | 1280.148 | 1141.169 |  | 0.011 |
| 20(1) | 10(1) | 1199.336 | 1059.690 |  | 0.171 |
| 20(1) | 11(1) | 1078.913 | 945.025  |  | 1.842 |
| 20(1) | 12(1) | 825.266  | 694.196  |  | 0.087 |
| 20(1) | 13(1) | 624.517  | 503.883  |  | 0.251 |
| 20(1) | 14(1) | 537.926  | 421.358  |  | 0.137 |
| 20(1) | 15(1) | 3296.762 | 3041.994 |  | 0.004 |
| 20(1) | 16(1) | 1684.489 | 1523.389 |  | 0.503 |
| 20(1) | 17(1) | 1274.250 | 1126.267 |  | 0.065 |
| 20(1) | 18(1) | 1073.668 | 941.470  |  | 1.268 |
| 20(1) | 19(1) | 700.374  | 571.146  |  | 0.013 |
| 21(1) | 1(1)  | 3636.879 | 3440.559 |  | 0.000 |
| 21(1) | 2(1)  | 3307.341 | 3144.444 |  | 0.061 |
| 21(1) | 3(1)  | 3207.348 | 3062.449 |  | 0.013 |
| 21(1) | 4(1)  | 2854.533 | 2708.936 |  | 0.000 |
| 21(1) | 5(1)  | 1860.754 | 1794.054 |  | 0.002 |
| 21(1) | 6(1)  | 1644.892 | 1581.209 |  | 0.392 |
| 21(1) | 7(1)  | 1574.237 | 1521.512 |  | 0.013 |
| 21(1) | 8(1)  | 1453.637 | 1392.394 |  | 0.254 |
| 21(1) | 9(1)  | 1247.165 | 1202.660 |  | 0.015 |
| 21(1) | 10(1) | 1166.352 | 1127.417 |  | 0.013 |
| 21(1) | 11(1) | 1045.930 | 1006.975 |  | 0.011 |
| 21(1) | 12(1) | 792.282  | 755.610  |  | 0.141 |
| 21(1) | 13(1) | 591.534  | 564.941  |  | 0.012 |
| 21(1) | 14(1) | 504.943  | 486.039  |  | 0.061 |
| 21(1) | 15(1) | 3263.779 | 3107.803 |  | 0.576 |
| 21(1) | 16(1) | 1651.506 | 1586.109 |  | 1.125 |
| 21(1) | 17(1) | 1241.266 | 1186.751 |  | 3.723 |
| 21(1) | 18(1) | 1040.684 | 997.230  |  | 0.239 |
| 21(1) | 19(1) | 667.390  | 639.346  |  | 0.071 |
| 21(1) | 20(1) | 373.744  | 227.411  |  | 0.023 |
